# Supplementary material for: A new ferrocenyl bisphosphorus ligand for the asymmetric hydrogenation of α-methylene-γ-keto-carboxylic acids
Source: Royal Society of Chemistry journal article supplement (doi:10.1039/c7cc04401a), 2017-01-01
Supplement: c7cc04401a1.pdf [file c7cc04401a1.pdf]

## Supporting Information for

# A new ferrocenyl bisphosphorus ligand for asymmetric hydrogenation of $\alpha$ -methylene- $\gamma$ -keto-carboxylic acids

Caiyou Chen, ‡<sup>a</sup> Songwei Wen, ‡<sup>a</sup> Mingyu Geng,<sup>a</sup> Shicheng Jin,<sup>a</sup> Zhefan Zhang,<sup>a</sup> Xiu-Qin Dong, \*<sup>a</sup> and Xumu Zhang\*<sup>b, a</sup>

<sup>a</sup> College of Chemistry and Molecular Sciences, Wuhan University, Wuhan, 430072, P. R. China;

<sup>b</sup> Department of Chemistry, South University of Science and Technology of China, Shenzhen, 518000, P. R. China.

## Contents

|                                                                 |           |
|-----------------------------------------------------------------|-----------|
| <b>General remarks .....</b>                                    | <b>2</b>  |
| <b>Synthesis of ligand <i>t</i>-Bu-Wudaphos .....</b>           | <b>2</b>  |
| 1. Synthesis of the intermediate <b>1</b> .....                 | 2         |
| 2. Synthesis of the <i>t</i> -Bu-Wudaphos .....                 | 3         |
| <b>Preparation of compounds <b>2m</b> and <b>8</b> .....</b>    | <b>4</b>  |
| 1. Preparation of compound <b>2m</b> .....                      | 4         |
| 2. Preparation of compound <b>8</b> .....                       | 5         |
| <b>General procedure for the asymmetric hydrogenation .....</b> | <b>6</b>  |
| <b>NMR spectra.....</b>                                         | <b>14</b> |
| <b>HPLC spectra .....</b>                                       | <b>37</b> |
| <b>Reference.....</b>                                           | <b>75</b> |

## General remarks

All reactions were performed in the argon-filled glovebox or under nitrogen using standard Schlenk techniques, unless otherwise noted. Solvents were dried with standard procedures and degassed with N<sub>2</sub>. Column chromatography was performed using 200~400 mesh silica gel. Thin layer chromatography (TLC) was performed on EM reagents 0.25 mm silica 60-F plates. <sup>1</sup>H, <sup>13</sup>C, and <sup>31</sup>P NMR spectrum were recorded on Bruker-400, with CDCl<sub>3</sub> as the solvent and tetramethylsilane (TMS) as the internal standard. Chemical shifts were reported in ppm, upfield to TMS (0.00 ppm) for and relative to CDCl<sub>3</sub> (7.26 ppm, 77.3 ppm) for <sup>1</sup>H NMR and <sup>13</sup>C NMR. Data are reported as: multiplicity (s = singlet, d = doublet, dd = double of doublet, t = triplet, dt = double of triplet, q = quartet, m = multiplet), coupling constant in hertz (Hz) and signal area integration in natural numbers. <sup>13</sup>C NMR and <sup>31</sup>P NMR analysis were run with decoupling. HPLC analysis was conducted on an Agilent 1260 Series instrument. High resolution mass spectrum was obtained on Thermo LTQ XL Orbitrap. Unless otherwise noted, all reagents and solvents were purchased from commercial suppliers and used without further purification.

The substrates for asymmetric hydrogenation were prepared according to the literature procedures.<sup>[1]</sup> The absolute configuration of products **3** was determined by comparison of optical data with those reported by the literature.<sup>[1c]</sup>

## Synthesis of ligand *t*-Bu-Wudaphos

### 1. Synthesis of the intermediate **1**

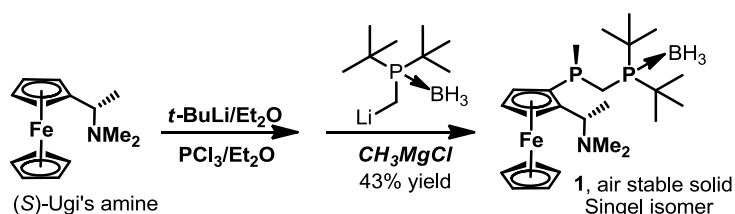

To an oven dried Schlenk flask (100 mL) was added (S)-Ugi's amine (10 mmol, 2.57 g) and 20 mL of dry Et<sub>2</sub>O under N<sub>2</sub> atmosphere. The resulting solution was cooled to -78 °C and *t*-BuLi (11 mmol, 1.5 M in pentane, 7.6 mL) was added carefully and dropwise. After the addition, the solution was allowed to warm to room

temperature (rt) and stirred for 1.5 h. The Schlenk flask was cooled to -78 °C and PCl<sub>3</sub> (10 mmol, 1.0 mL) was added in one portion. The yellow suspension was allowed to warm to rt and stirred for 1.5 h. The Schlenk flask was cooled to -78 °C and borane protected ((di-tert-butylphosphino)methyl)lithium (11 mmol, prepared by treating borane protected di-tert-butyl(methyl)phosphine<sup>[2]</sup> with *s*-BuLi in an 1:1.1 molar ratio under 0 °C for 1.0 h in Et<sub>2</sub>O) was added dropwise and the resulting suspension was allowed to warm to rt and stirred for 1.5 h. The Schlenk flask was cooled to -78 °C again and CH<sub>3</sub>MgCl (3.0 M in Et<sub>2</sub>O, 3.7 mL) was added dropwise. The resulting yellow suspension was allowed to warm to rt and stirred for 3 h. Water (20 mL) was added into the Schlenk flask and the solution was stirred for 10 min. The organic phase was separated and the aqueous phase was extracted by ethyl acetate (30 mL X 3). The organic phases were combined, dried and concentrated under reduced pressure. The residue was purified by column chromatography to give the desired product **1** as a yellow solid (2.04g, 43% yield). [ $\alpha$ ]<sub>D</sub><sup>20</sup> = 22.000 (c 0.100, CHCl<sub>3</sub>); HRMS (ESI) calculated for C<sub>24</sub>H<sub>45</sub>BFeNP<sub>2</sub><sup>+</sup> [M + H<sup>+</sup>]: 476.2464; found: 476.2462. <sup>1</sup>H NMR (400 MHz, CDCl<sub>3</sub>):  $\delta$  4.31 (s, 1H), 4.26 (s, 1H), 4.22 (d, *J* = 0.9 Hz, 1H), 4.15 (dd, *J* = 11.6, 4.8 Hz, 1H), 4.12 – 4.03 (m, 5H), 2.30 (t, *J* = 14.8 Hz, 2H), 2.06 (s, 6H), 1.61 (d, *J* = 4.1 Hz, 3H), 1.42 – 1.34 (m, 9H), 1.25 (d, *J* = 6.5 Hz, 3H), 1.18 (d, *J* = 12.4 Hz, 9H), 0.66 (brs, 1H), 0.40 (brs, 1H), 0.21 (brs, 1H) ppm; <sup>13</sup>C NMR (101 MHz, CDCl<sub>3</sub>)  $\delta$  95.92, 69.84 (d, *J* = 3.6 Hz), 69.56, 68.14, 67.82 (d, *J* = 5.3 Hz), 56.71 (d, *J* = 7.6 Hz), 39.73, 32.72 (dd, *J* = 51.9, 26.0 Hz), 28.25 (d, *J* = 6.5 Hz), 27.72, 25.19, 21.85 (dd, *J* = 32.7, 18.7 Hz), 12.29 (d, *J* = 12.7 Hz), 7.21 ppm; <sup>31</sup>P NMR (162 MHz, CDCl<sub>3</sub>):  $\delta$  43.02 (s), -48.34 (d, *J* = 25.8 Hz) ppm.

## 2. Synthesis of the *t*-Bu-Wudaphos

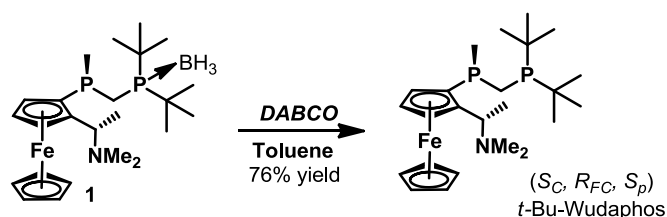

To an oven dried Schlenk flask (100 mL) was added the intermediate **1** (4 mmol,

1.90 g), DABCO (4.8 mmol, 540 mg) and 50 mL of dry toluene under N<sub>2</sub> atmosphere. The reaction system was heated to 80 °C and stirred for 8 h. The resulting solution was concentrated under reduced pressure. The residue was purified by column chromatography to give the desired product *t*-Bu-Wudaphos (air stable yellow solid, 1.40 g, 76% yield).  $[\alpha]_D^{20} = 25.385$  (c 0.130, CHCl<sub>3</sub>); HRMS (ESI) calculated for C<sub>24</sub>H<sub>42</sub>FeNP<sub>2</sub><sup>+</sup> [M + H<sup>+</sup>]: 462.2136; found: 462.2130. <sup>1</sup>H NMR (400 MHz, CDCl<sub>3</sub>): δ 4.29 (brs, 1H), 4.26 – 4.20 (m, 2H), 4.15 (qd, *J* = 6.7, 2.5 Hz, 1H), 4.08 (s, 5H), 2.08 (s, 6H), 2.06 – 2.03 (m, 1H), 1.75 – 1.61 (m, 1H), 1.47 (d, *J* = 4.1 Hz, 3H), 1.24 (d, *J* = 6.8 Hz, 3H), 1.21 (d, *J* = 11.2 Hz, 9H), 1.06 (d, *J* = 11.1 Hz, 9H) ppm; <sup>13</sup>C NMR (101 MHz, CDCl<sub>3</sub>): δ 96.31 (d, *J* = 22.3 Hz), 81.47 (dd, *J* = 16.4, 15.0 Hz), 70.16, 69.41, 67.67, 67.33 (d, *J* = 5.9 Hz), 56.88 (d, *J* = 7.3 Hz), 39.69, 31.86 (dd, *J* = 20.8, 2.6 Hz), 31.33 (dd, *J* = 22.0, 8.5 Hz), 29.78 (dd, *J* = 13.1, 4.4 Hz), 29.52 (d, *J* = 13.5 Hz), 25.10 (dd, *J* = 33.5, 18.1 Hz), 10.35 (dd, *J* = 11.0, 6.9 Hz), 7.51 ppm; <sup>31</sup>P NMR (162 MHz, CDCl<sub>3</sub>): δ 20.29 (d, *J* = 107.5 Hz), -49.86 (d, *J* = 107.6 Hz) ppm.

## Preparation of compounds 2m and 8

### 1. Preparation of compound 2m

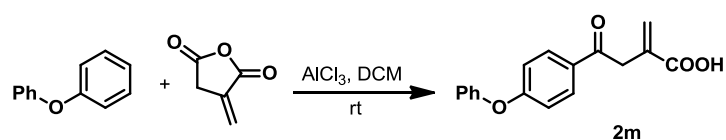

The following is a modified literature procedure. <sup>[1c]</sup> To an oven dried Schlenk flask with DCM (5 mL) was added AlCl<sub>3</sub> (20 mmol, 2.67 g) portion-wise under argon atmosphere. 3-methylenedihydrofuran-2,5-dione (10 mmol, 1.12 g) was then added and the oxydibenzene (15 mmol, 2.55 g) was added dropwise. The resulting suspension was stirred at rt for 2 h. After the reaction, the suspension was poured into ice water (20 mL) and conc. HCl aqueous solution (5 mL) was added dropwise. Hexane (30 mL) was then added and the mixture was then stirred for 20 min and filtered. The filtrate was washed with 3M HCl solution (30 mL X 1), PE (30 mL X 2) and dried. The crude product was further recrystallized with PE/EA as the solvent to



give the pure product **2m** as a white solid (2.54 g, 90% yield).  $^1\text{H}$  NMR (400 MHz,  $\text{CDCl}_3$ )  $\delta$  8.01–7.93 (m, 2H), 7.41 (dd,  $J = 8.4, 7.5$  Hz, 2H), 7.25–7.18 (m, 1H), 7.12–7.06 (m, 2H), 7.05–6.98 (m, 2H), 6.53 (s, 1H), 5.81 (s, 1H), 3.97 (s, 2H) ppm.  $^{13}\text{C}$  NMR (101 MHz,  $\text{CDCl}_3$ ):  $\delta$  195.51, 171.53, 162.51, 155.63, 134.33, 131.18, 131.09, 130.88, 130.36, 124.97, 120.52, 117.59, 41.36 ppm.

## 2. Preparation of compound **8**

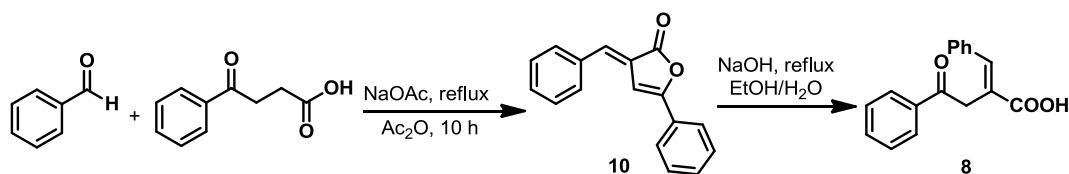

The compound **10** was synthesized according to the reported procedure.<sup>[1d]</sup> A mixture of 10 mmol of benzaldehyde, 10 mmol of 3-benzoylpropionic acid, 10 mmol of sodium acetate and 5 mL of acetic anhydride was heated under reflux for 10 h until crystals separated. After cooling, the reaction was poured into water, and the solid product was filtered, washed with water and finally recrystallized from 95% ethanol. Pure product was easily obtained by filtration (compound **10**, 1.32 g, 53% yield). The compound **8** was synthesized according to a modified literature procedure.<sup>[1e]</sup> A mixture of 0.21 g (5.3 mmol) of sodium hydroxide, 5.3 mmol of the compound **10** and 30 mL of ethanol/water ( $V/V = 2:1$ ) was heated under reflux for 6 hours and then allowed to cool room temperature. After evaporation of ethanol, HCl (20%) was added until the mixture was acidified (pH 1). The aqueous layer was extracted with ethyl acetate ( $3 \times 10$  mL). The combined extracts were washed with a saturated solution of NaCl (20 mL), dried over  $\text{Na}_2\text{SO}_4$ , and evaporated in vacuo. The residue was purified by column chromatography (eluant: DCM/MeOH ( $V/V = 15:1$ )) to give the product **8** (a white solid, 1.27 g, 90% yield).  $^1\text{H}$  NMR (400 MHz,  $\text{CDCl}_3$ ):  $\delta$  8.13 (s, 1H), 8.01 (d,  $J = 7.4$  Hz, 2H), 7.59 (t,  $J = 7.4$  Hz, 1H), 7.48 (t,  $J = 7.6$  Hz, 2H), 7.36–7.30 (m, 5H), 4.21 (s, 2H) ppm.  $^{13}\text{C}$  NMR (101 MHz,  $\text{CDCl}_3$ ):  $\delta$  197.40, 172.64, 144.64, 136.75, 135.23, 133.64, 129.38, 129.17, 128.95, 128.59, 126.50, 38.15 ppm.

## General procedure for the asymmetric hydrogenation

In an argon-filled glove box,  $[\text{Rh}(\text{NBD})_2]\text{BF}_4$  (0.01 mmol) and *t*-Bu-Wudaphos (0.011 mmol) were dissolved in THF (1.0 mL) and stirred for 45 min. 0.1 mL of the resulting solution was transferred by syringe into the vials charged with different substrates (0.1 mmol for each). Additional THF was added to bring the total reaction volume to 1.0 mL. The vials were subsequently transferred into an autoclave which was charged with hydrogen (10 bar). The reaction was then stirred at rt for 12 h. The hydrogen gas was released slowly and carefully in a well-ventilated hood. The solution was passed through a short column of silica gel (eluent: EtOAc) to remove the metal complex and concentrated to give compounds **3**. The ee values of compounds **3** were then determined by HPLC analysis on a chiral stationary phase.

The following products can be obtained following the procedures for asymmetric hydrogenation.

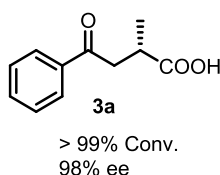

>99% conv., 98% ee, white solid;  $[\alpha]_{\text{D}}^{20} = -32.9$  (c 0.240,  $\text{CHCl}_3$ );  $^1\text{H}$  NMR (400 MHz,  $\text{CDCl}_3$ ):  $\delta$  7.98-7.96 (m, 2H), 7.59-7.55 (m, 1H), 7.47 (t,  $J = 8.0$  Hz, 2H), 3.48 (dd,  $J = 17.6, 7.6$  Hz, 1H), 3.21-3.12 (m, 1H), 3.06 (dd,  $J = 17.6, 5.2$  Hz, 1H), 1.32 (d,  $J = 7.2$  Hz, 3H) ppm;  $^{13}\text{C}$  NMR (101 MHz,  $\text{CDCl}_3$ ):  $\delta$  198.16, 182.28, 136.71, 133.59, 128.90, 128.32, 41.97, 35.06, 17.36 ppm. The enantiomeric excess of **3a** was determined by chiral HPLC analysis on Chiralpak OJ-H column. Conditions: hexane/isopropanol = 95 :5, flow rate = 1.0 mL/min, uv-vis detection at  $\lambda = 230$  nm,  $t_{\text{R}} = 17.9$  min (major), 22.6 min (minor).

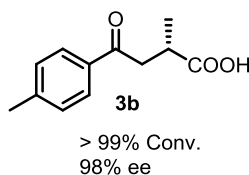

>99% conv., 98% ee, white solid;  $[\alpha]_{\text{D}}^{20} = -42.6$  (c 0.385,  $\text{CHCl}_3$ );  $^1\text{H}$  NMR (400 MHz,  $\text{CDCl}_3$ ):  $\delta$  7.87 (d,  $J = 8.0$  Hz, 2H), 7.26 (d,  $J = 8.0$  Hz, 2H), 3.45 (dd,  $J =$

18.0, 7.6 Hz, 1H), 3.19 – 3.11 (m, 1H), 3.04 (dd,  $J = 17.6, 5.6$  Hz, 1H), 2.42 (s, 3H), 1.31 (d,  $J = 6.8$  Hz, 3H) ppm;  $^{13}\text{C}$  NMR (101 MHz,  $\text{CDCl}_3$ ):  $\delta$  197.87, 182.20, 144.41, 134.27, 129.56, 128.45, 41.88, 35.12, 21.94, 17.37 ppm. The enantiomeric excess of **3b** was determined by chiral HPLC analysis on Chiralpak OJ-H column. Conditions: hexane/isopropanol = 95 :5, flow rate = 1.0 mL/min, uv-vis detection at  $\lambda = 254$  nm,  $t_R = 17.0$  min (major), 22.8 min (minor).

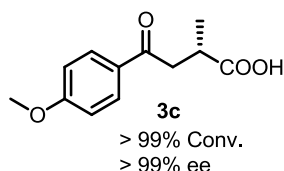

>99% conv., > 99% ee, white solid;  $[\alpha]_D^{20} = -33.9$  (c 0.440,  $\text{CHCl}_3$ );  $^1\text{H}$  NMR (400 MHz,  $\text{CDCl}_3$ ):  $\delta$  7.95 (d,  $J = 8.9$  Hz, 2H), 6.93 (d,  $J = 8.9$  Hz, 2H), 3.87 (s, 3H), 3.42 (dd,  $J = 17.5, 7.7$  Hz, 1H), 3.19 – 3.09 (m, 1H), 3.02 (dd,  $J = 17.6, 5.5$  Hz, 1H), 1.31 (d,  $J = 7.1$  Hz, 3H) ppm;  $^{13}\text{C}$  NMR (101 MHz,  $\text{CDCl}_3$ ):  $\delta$  196.74, 182.19, 163.89, 130.62, 129.83, 114.01, 55.76, 41.63, 35.13, 17.38 ppm. The enantiomeric excess of **3c** was determined by chiral HPLC analysis on Chiralpak OJ-H column. Conditions: hexane/isopropanol = 95 :5, flow rate = 1.0 mL/min, uv-vis detection at  $\lambda = 254$  nm,  $t_R = 46.3$  min (major), 60.4 min (minor).

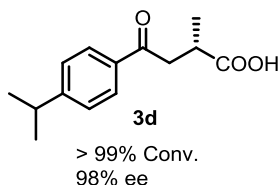

>99% conv., 98% ee, white solid;  $[\alpha]_D^{20} = -39.3$  (c 0.450,  $\text{CHCl}_3$ );  $^1\text{H}$  NMR (400 MHz,  $\text{CDCl}_3$ ):  $\delta$  7.90 (d,  $J = 8.3$  Hz, 2H), 7.31 (d,  $J = 8.2$  Hz, 2H), 3.45 (dd,  $J = 17.6, 7.5$  Hz, 1H), 3.21 – 3.09 (m, 1H), 3.09 – 2.99 (m, 1H), 2.98-2.91 (m, 1H), 1.30 (d,  $J = 7.1$  Hz, 3H), 1.26 (d,  $J = 6.9$  Hz, 6H) ppm;  $^{13}\text{C}$  NMR (101 MHz,  $\text{CDCl}_3$ ):  $\delta$  197.86, 182.34, 155.11, 134.63, 128.60, 126.97, 41.89, 35.13, 34.52, 23.93, 17.35 ppm. The enantiomeric excess of **3d** was determined by chiral HPLC analysis on Chiralpak OJ-H column. Conditions: hexane/isopropanol = 95 :5, flow rate = 1.0 mL/min, uv-vis detection at  $\lambda = 254$  nm,  $t_R = 12.9$  min (major), 16.9 min (minor).

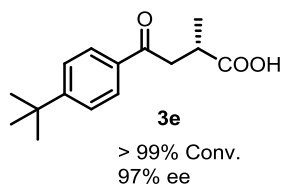

>99% conv., 97% *ee*, white solid;  $[\alpha]_{\text{D}}^{20} = -36.2$  (c 0.425,  $\text{CHCl}_3$ );  $^1\text{H}$  NMR (400 MHz,  $\text{CDCl}_3$ ):  $\delta$  7.92 (d,  $J = 8.5$  Hz, 2H), 7.48 (d,  $J = 8.5$  Hz, 2H), 3.46 (dd,  $J = 17.6, 7.5$  Hz, 1H), 3.22 – 3.10 (m, 1H), 3.04 (dd,  $J = 17.6, 5.7$  Hz, 1H), 1.34 (s, 9H), 1.31 (d,  $J = 7.1$  Hz, 3H) ppm;  $^{13}\text{C}$  NMR (101 MHz,  $\text{CDCl}_3$ ):  $\delta$  197.88, 182.45, 157.30, 134.19, 128.31, 125.83, 41.89, 35.38, 35.15, 31.33, 17.35 ppm. The enantiomeric excess of **3e** was determined by chiral HPLC analysis on Chiralpak OJ-H column. Conditions: hexane/isopropanol = 95 :5, flow rate = 1.0 mL/min, uv-vis detection at  $\lambda = 230$  nm,  $t_{\text{R}} = 10.3$  min (major), 15.2 min (minor).

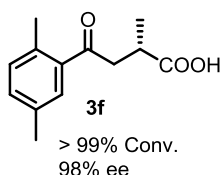

>99% conv., 98% *ee*, white solid;  $[\alpha]_{\text{D}}^{20} = -31.5$  (c 0.425,  $\text{CHCl}_3$ );  $^1\text{H}$  NMR (400 MHz,  $\text{CDCl}_3$ ):  $\delta$  7.47 (s, 1H), 7.20 – 7.10 (m, 2H), 3.39 (dd,  $J = 17.8, 8.0$  Hz, 1H), 3.18 – 3.08 (m, 1H), 2.96 (dd,  $J = 17.8, 5.4$  Hz, 1H), 2.43 (s, 3H), 2.36 (s, 3H), 1.30 (d,  $J = 7.2$  Hz, 3H) ppm;  $^{13}\text{C}$  NMR (101 MHz,  $\text{CDCl}_3$ ):  $\delta$  202.21, 182.31, 137.44, 135.46, 132.50, 132.17, 129.41, 44.76, 35.32, 21.19, 21.14, 17.30 ppm. The enantiomeric excess of **3f** was determined by chiral HPLC analysis on Chiralpak OJ-H column. Conditions: hexane/isopropanol = 95 :5, flow rate = 1.0 mL/min, uv-vis detection at  $\lambda = 254$  nm,  $t_{\text{R}} = 10.9$  min (major), 16.7 min (minor).

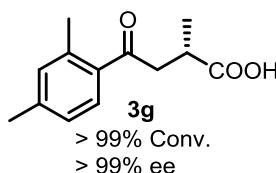

>99% conv., > 99% *ee*, white solid;  $[\alpha]_{\text{D}}^{20} = -34.2$  (c 0.503,  $\text{CHCl}_3$ );  $^1\text{H}$  NMR (400 MHz,  $\text{CDCl}_3$ ):  $\delta$  7.63 (d,  $J = 8.5$  Hz, 1H), 7.06 (d,  $J = 7.1$  Hz, 2H), 3.38 (dd,  $J = 17.6, 8.0$  Hz, 1H), 3.16 – 3.06 (m, 1H), 2.96 (dd,  $J = 17.6, 5.4$  Hz, 1H), 2.48 (s, 3H), 2.35 (s, 3H), 1.29 (d,  $J = 7.2$  Hz, 3H) ppm;  $^{13}\text{C}$  NMR (101 MHz,  $\text{CDCl}_3$ )  $\delta$  201.32, 182.32, 142.48, 139.22, 134.47, 133.20, 129.44, 126.59, 44.44, 35.39, 21.90, 21.65, 17.31 ppm. The enantiomeric excess of **3g** was determined by chiral HPLC analysis on Chiralpak OJ-H column. Conditions: hexane/isopropanol = 95 :5, flow rate = 1.0 mL/min, uv-vis detection at  $\lambda = 254$  nm,  $t_{\text{R}} = 14.5$  min (major), 26.2 min (minor).

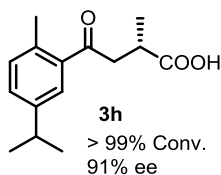

>99% conv., 91% *ee*, white solid;  $[\alpha]_{\text{D}}^{20} = -35.1$  (c 0.305,  $\text{CHCl}_3$ );  $^1\text{H}$  NMR (400 MHz,  $\text{CDCl}_3$ ):  $\delta$  7.50 (d,  $J = 1.6$  Hz, 1H), 7.27 – 7.14 (m, 2H), 3.40 (dd,  $J = 17.7$ , 7.9 Hz, 1H), 3.19 – 3.09 (m, 1H), 3.03 – 2.86 (m, 2H), 2.44 (s, 3H), 1.31 (d,  $J = 7.2$  Hz, 3H), 1.26 (d,  $J = 6.9$  Hz, 6H) ppm;  $^{13}\text{C}$  NMR (101 MHz,  $\text{CDCl}_3$ ):  $\delta$  202.33, 182.41, 146.59, 137.59, 135.84, 132.26, 129.79, 126.89, 44.80, 35.35, 33.96, 24.25, 21.15, 17.29 ppm. The enantiomeric excess of **3h** was determined by chiral HPLC analysis on Chiralpak OJ-H column. Conditions: hexane/isopropanol = 95 :5, flow rate = 1.0 mL/min, uv-vis detection at  $\lambda = 230$  nm,  $t_{\text{R}} = 6.8$  min (major), 7.9 min (minor).

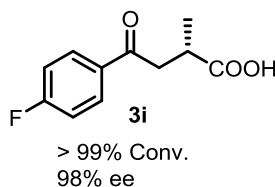

>99% conv., 98% *ee*, white solid;  $[\alpha]_{\text{D}}^{20} = -36.9$  (c 0.325,  $\text{CHCl}_3$ );  $^1\text{H}$  NMR (400 MHz,  $\text{CDCl}_3$ ):  $\delta$  8.02 – 7.97 (m, 2H), 7.16 – 7.10 (m, 2H), 3.44 (dd,  $J = 17.8$ , 7.9 Hz, 1H), 3.19 – 3.10 (m, 1H), 3.01 (dd,  $J = 17.8$ , 5.3 Hz, 1H), 1.32 (d,  $J = 7.2$  Hz, 3H) ppm;  $^{13}\text{C}$  NMR (101 MHz,  $\text{CDCl}_3$ ):  $\delta$  196.56, 182.33, 166.12 (d,  $J = 255.0$  Hz), 133.16 (d,  $J = 3.0$  Hz), 130.97 (d,  $J = 9.4$  Hz), 116.01 (d,  $J = 21.9$  Hz), 41.86, 35.09, 17.37 ppm. The enantiomeric excess of **3i** was determined by chiral HPLC analysis on Chiralpak OJ-H column. Conditions: hexane/isopropanol = 95 :5, flow rate = 1.0 mL/min, uv-vis detection at  $\lambda = 210$  nm,  $t_{\text{R}} = 19.5$  min (major), 22.6 min (minor).

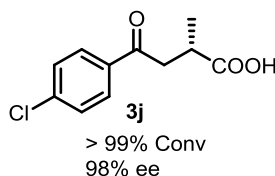

>99% conv., 98% *ee*, white solid;  $[\alpha]_{\text{D}}^{20} = -41.0$  (c 0.305,  $\text{CHCl}_3$ );  $^1\text{H}$  NMR (400 MHz,  $\text{CDCl}_3$ ):  $\delta$  7.90 (d,  $J = 8.6$  Hz, 2H), 7.43 (d,  $J = 8.6$  Hz, 2H), 3.44 (dd,  $J = 17.8$ , 7.9 Hz, 1H), 3.19 – 3.09 (m, 1H), 3.00 (dd,  $J = 17.8$ , 5.2 Hz, 1H), 1.31 (d,  $J = 7.2$  Hz, 3H) ppm;  $^{13}\text{C}$  NMR (101 MHz,  $\text{CDCl}_3$ ):  $\delta$  196.98, 182.21, 140.03, 135.02,

129.74, 129.22, 41.92, 35.07, 17.37 ppm. The enantiomeric excess of **3j** was determined by chiral HPLC analysis on Chiralpak OJ-H column. Conditions: hexane/isopropanol = 95 :5, flow rate = 1.0 mL/min, uv-vis detection at  $\lambda = 254$  nm,  $t_R = 19.3$  min (major), 26.0 min (minor).

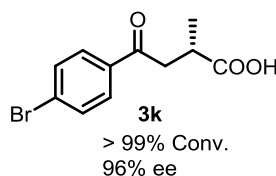

>99% conv., 96% ee, white solid;  $[\alpha]_D^{20} = -35.0$  (c 0.400,  $\text{CHCl}_3$ );  $^1\text{H}$  NMR (400 MHz,  $\text{CDCl}_3$ ):  $\delta$  7.76 (d,  $J = 8.6$  Hz, 2H), 7.54 (d,  $J = 8.6$  Hz, 2H), 3.36 (dd,  $J = 17.8, 8.0$  Hz, 1H), 3.13 – 3.03 (m, 1H), 2.93 (dd,  $J = 17.8, 5.2$  Hz, 1H), 1.25 (d,  $J = 7.2$  Hz, 3H) ppm;  $^{13}\text{C}$  NMR (101 MHz,  $\text{CDCl}_3$ ):  $\delta$  197.15, 181.87, 135.43, 132.23, 129.85, 128.80, 41.90, 34.99, 17.38 ppm. The enantiomeric excess of **3k** was determined by chiral HPLC analysis on Chiralpak OJ-H column. Conditions: hexane/isopropanol = 95 :5, flow rate = 1.0 mL/min, uv-vis detection at  $\lambda = 254$  nm,  $t_R = 22.6$  min (major), 32.2 min (minor).

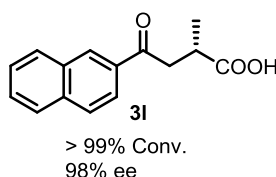

>99% conv., 98% ee, white solid;  $[\alpha]_D^{20} = -61.7$  (c 0.360,  $\text{CHCl}_3$ );  $^1\text{H}$  NMR (400 MHz,  $\text{CDCl}_3$ ):  $\delta$  8.43 (s, 1H), 7.96 (dd,  $J = 8.6, 1.5$  Hz, 1H), 7.89 (d,  $J = 8.0$  Hz, 1H), 7.81 (t,  $J = 7.9$  Hz, 2H), 7.57 – 7.45 (m, 2H), 3.60 – 3.50 (m, 1H), 3.19 – 3.10 (m, 2H), 1.30 (d,  $J = 7.0$  Hz, 3H) ppm;  $^{13}\text{C}$  NMR (101 MHz,  $\text{CDCl}_3$ ):  $\delta$  198.13, 181.67, 135.95, 134.08, 132.73, 130.13, 129.86, 128.84, 128.78, 128.06, 127.10, 123.99, 42.07, 35.13, 17.46 ppm. The enantiomeric excess of **3l** was determined by chiral HPLC analysis on Chiralpak OJ-H column. Conditions: hexane/isopropanol = 95 :5, flow rate = 1.0 mL/min, uv-vis detection at  $\lambda = 230$  nm,  $t_R = 42.2$  min (major), 67.0 min (minor).

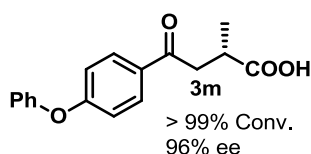

>99% conv., 96% *ee*, white solid;  $[\alpha]_D^{20} = -6.8$  (c 0.340, CHCl<sub>3</sub>); <sup>1</sup>H NMR (400 MHz, CDCl<sub>3</sub>): δ 7.98–7.91 (m, 2H), 7.44–7.36 (m, 2H), 7.24–7.17 (m, 1H), 7.07 (dt, *J* = 9.0, 1.8 Hz, 2H), 7.03–6.97 (m, 2H), 3.43 (dd, *J* = 17.7, 7.8 Hz, 1H), 3.24–3.08 (m, 1H), 3.01 (dd, *J* = 17.7, 5.4 Hz, 1H), 1.31 (d, *J* = 7.2 Hz, 3H) ppm. <sup>13</sup>C NMR (101 MHz, CDCl<sub>3</sub>): δ 196.74, 181.87, 162.43, 155.65, 131.40, 130.63, 130.34, 124.93, 120.47, 117.57, 41.77, 35.09, 17.40 ppm. The enantiomeric excess of **3m** was determined by chiral HPLC analysis on Chiralpak AD-H column. Conditions: hexane/isopropanol = 95 :5, flow rate = 1.0 mL/min, uv-vis detection at λ = 210 nm, *t*<sub>R</sub> = 41.0 min (minor), 45.6 min (major).

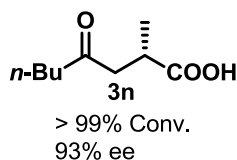

>99% conv., 93% *ee*, white solid;  $[\alpha]_D^{20} = -6.6$  (c 0.52, CHCl<sub>3</sub>). <sup>1</sup>H NMR (400 MHz, CDCl<sub>3</sub>): δ 3.01 – 2.85 (m, 2H), 2.47 – 2.41 (m, 3H), 1.61 – 1.53 (m, 2H), 1.35 – 1.29 (m, 2H), 1.22 (d, *J* = 7.1 Hz, 3H), 0.91 (t, *J* = 7.3 Hz, 3H) ppm; <sup>13</sup>C NMR (101 MHz, CDCl<sub>3</sub>): δ 209.50, 182.08, 45.68, 42.86, 34.81, 26.06, 22.54, 17.16, 14.11 ppm. The enantiomeric excess of **3n** was determined by chiral HPLC analysis on Chiralpak OJ-H column after esterification with BnOH in the presence of DCC and DMAP. Conditions: hexane/isopropanol = 99 :1, flow rate = 1.0 mL/min, uv-vis detection at λ = 210 nm, *t*<sub>R</sub> = 18.0 min (minor), 19.8 min (major).

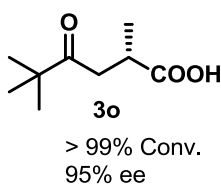

>99% conv., 95% *ee*, colorless oil;  $[\alpha]_D^{20} = -11.5$  (c 0.900, CHCl<sub>3</sub>). <sup>1</sup>H NMR (400 MHz, CDCl<sub>3</sub>): δ 2.99 – 2.93 (m, 2H), 2.62 – 2.55 (m, 1H), 1.21 (d, *J* = 6.7 Hz, 3H), 1.15 (s, 9H) ppm; <sup>13</sup>C NMR (101 MHz, CDCl<sub>3</sub>): δ 214.30, 182.32, 44.17, 40.29, 34.90, 26.64, 17.17 ppm. The enantiomeric excess of **3o** was determined by chiral HPLC analysis on Chiralpak OJ-H column after esterification with BnOH in the presence of DCC and DMAP. Conditions: hexane/isopropanol = 99 :1, flow rate = 1.0 mL/min, uv-vis detection at λ = 210 nm, *t*<sub>R</sub> = 10.2 min (minor), 11.8 min (major).

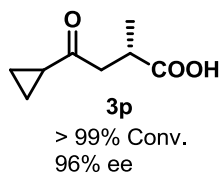

>99% conv., 96% *ee*, colorless oil;  $[\alpha]_D^{20} = -13.5$  (c 0.635,  $\text{CHCl}_3$ ).  $^1\text{H}$  NMR (400 MHz,  $\text{CDCl}_3$ )  $\delta$  3.08 – 2.95 (m, 2H), 2.67 (dd,  $J = 17.2, 5.0$  Hz, 1H), 1.96 – 1.90 (m, 1H), 1.23 (d,  $J = 7.0$  Hz, 3H), 1.05 (dd,  $J = 4.5, 2.9$  Hz, 2H), 0.92 – 0.88 (m, 2H) ppm;  $^{13}\text{C}$  NMR (101 MHz,  $\text{CDCl}_3$ ):  $\delta$  209.19, 181.60, 46.38, 34.84, 20.90, 17.18, 11.23, 11.16 ppm. The enantiomeric excess of **3p** was determined by chiral HPLC analysis on Chiralpak OJ-H column after esterification with BnOH in the presence of DCC and DMAP. Conditions: hexane/isopropanol = 99 :1, flow rate = 1.0 mL/min, uv-vis detection at  $\lambda = 210$  nm,  $t_R = 25.1$  min (minor), 32.2 min (major).

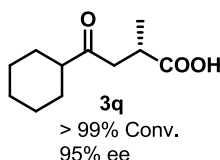

>99% conv., 95% *ee*, colorless oil;  $[\alpha]_D^{20} = -11.9$  (c 0.655,  $\text{CHCl}_3$ ).  $^1\text{H}$  NMR (400 MHz,  $\text{CDCl}_3$ ):  $\delta$  2.99 – 2.89 (m, 2H), 2.52 (dd,  $J = 17.3, 4.8$  Hz, 1H), 2.37 – 2.31 (m, 1H), 1.87 – 1.77 (m, 4H), 1.68 – 1.66 (m, 1H), 1.38 – 1.17 (m, 8H) ppm;  $^{13}\text{C}$  NMR (101 MHz,  $\text{CDCl}_3$ ):  $\delta$  212.34, 182.14, 51.00, 43.77, 34.74, 28.61, 28.58, 26.07, 25.89, 25.84, 17.20 ppm. The enantiomeric excess of **3q** was determined by chiral HPLC analysis on Chiralpak OJ-H column after esterification with BnOH in the presence of DCC and DMAP. Conditions: hexane/isopropanol = 99 :1, flow rate = 1.0 mL/min, uv-vis detection at  $\lambda = 205$  nm,  $t_R = 15.3$  min (minor), 19.7 min (major).

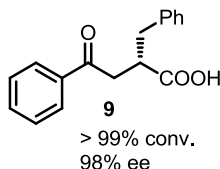

>99% conv., 98% *ee*, white solid;  $[\alpha]_D^{20} = 3.7$  (c 0.295,  $\text{CHCl}_3$ );  $^1\text{H}$  NMR (400 MHz,  $\text{CDCl}_3$ ):  $\delta$  7.87 (d,  $J = 7.5$  Hz, 2H), 7.53 (t,  $J = 7.3$  Hz, 1H), 7.40 (t,  $J = 7.4$  Hz, 2H), 7.33 – 7.26 (m, 2H), 7.21 (d,  $J = 7.3$  Hz, 3H), 3.48 – 3.28 (m, 2H), 3.20 (dd,  $J = 13.7, 4.1$  Hz, 1H), 2.98 (dd,  $J = 21.2, 7.6$  Hz, 1H), 2.84 (dd,  $J = 13.3, 8.1$  Hz, 1H)



ppm.  $^{13}\text{C}$  NMR (101 MHz,  $\text{CDCl}_3$ ):  $\delta$  198.50, 180.81, 138.67, 136.65, 133.55, 129.35, 128.89, 128.82, 128.32, 126.97, 42.36, 39.21, 37.65 ppm. The enantiomeric excess of **9** was determined by chiral HPLC analysis on Chiralpak AD-H column. Conditions: hexane/isopropanol = 95 :5, flow rate = 1.0 mL/min, uv-vis detection at  $\lambda = 210$  nm,  $t_{\text{R}} = 35.8$  min (minor), 41.9 min (major).

# NMR spectra

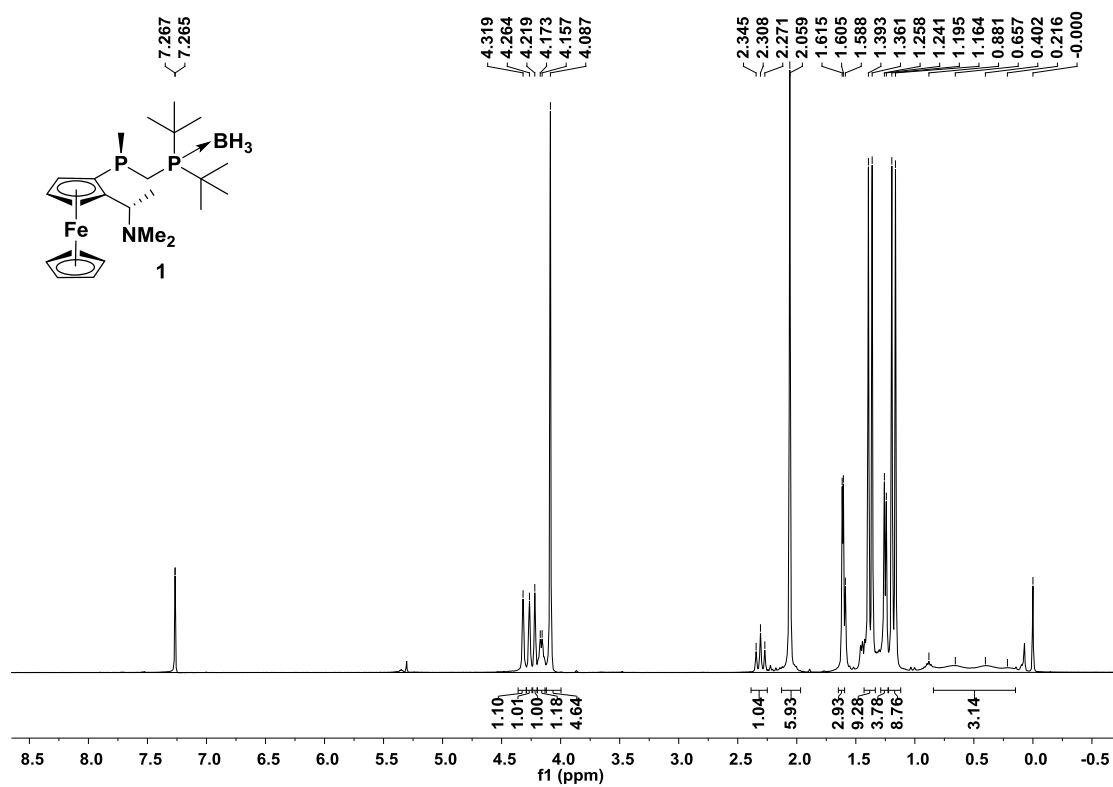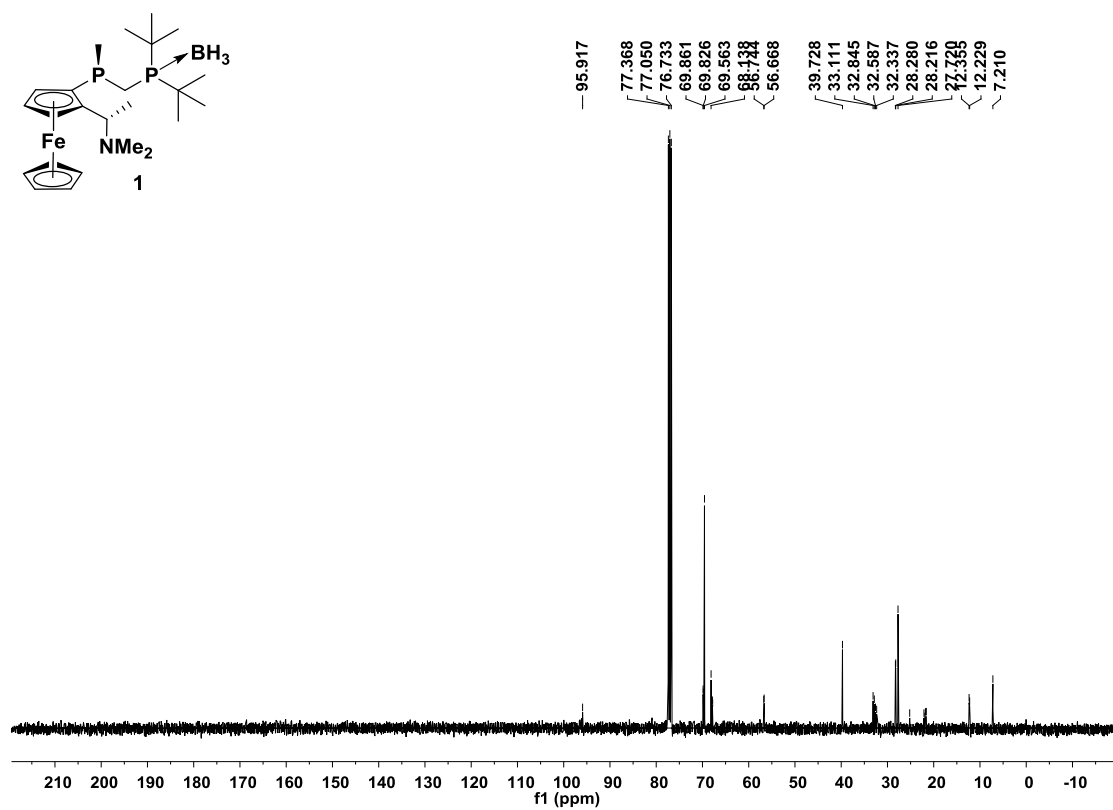

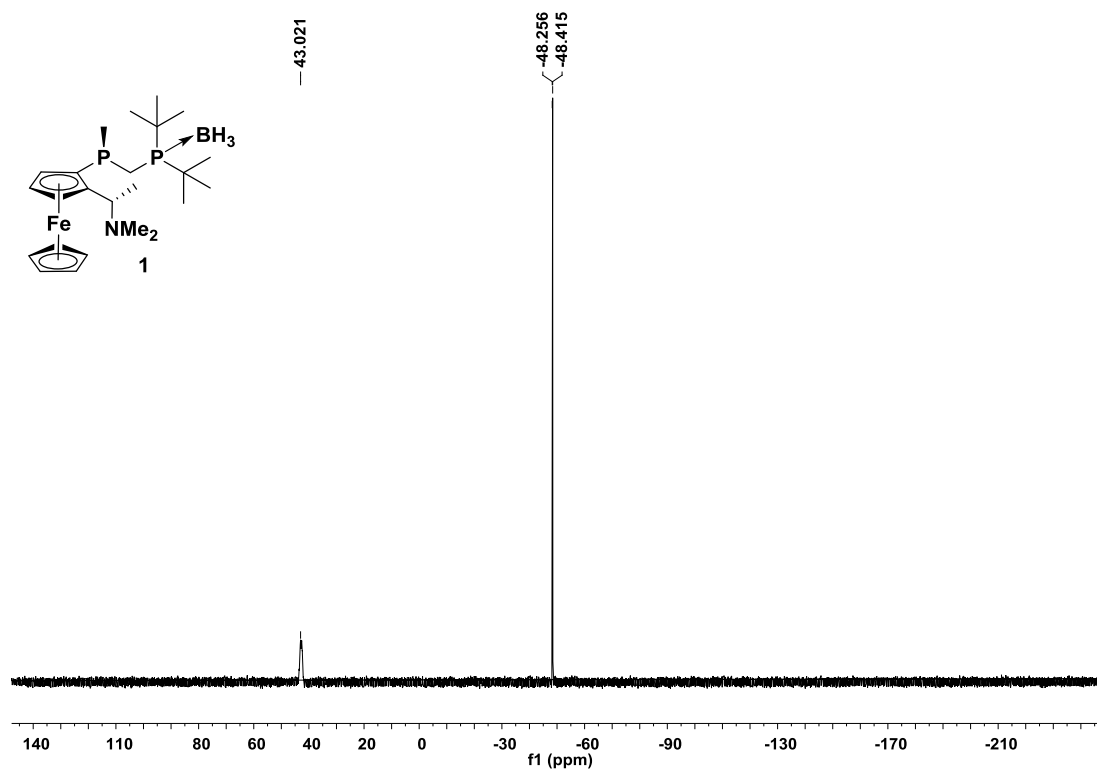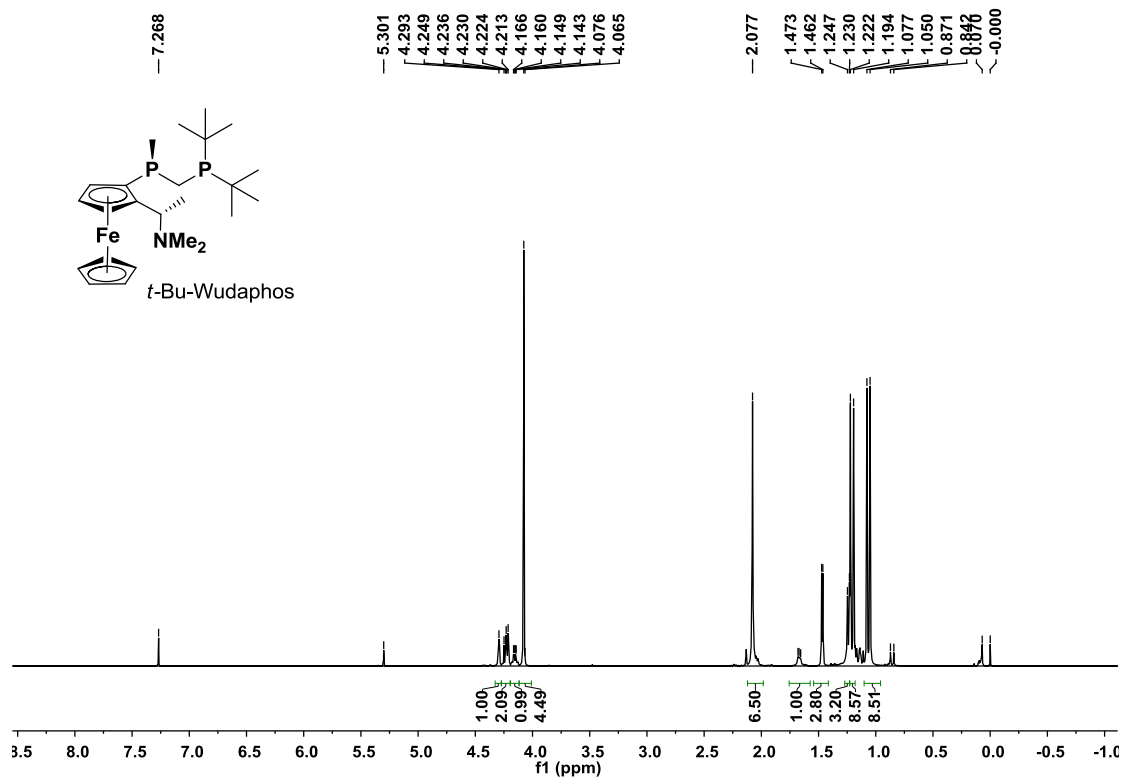

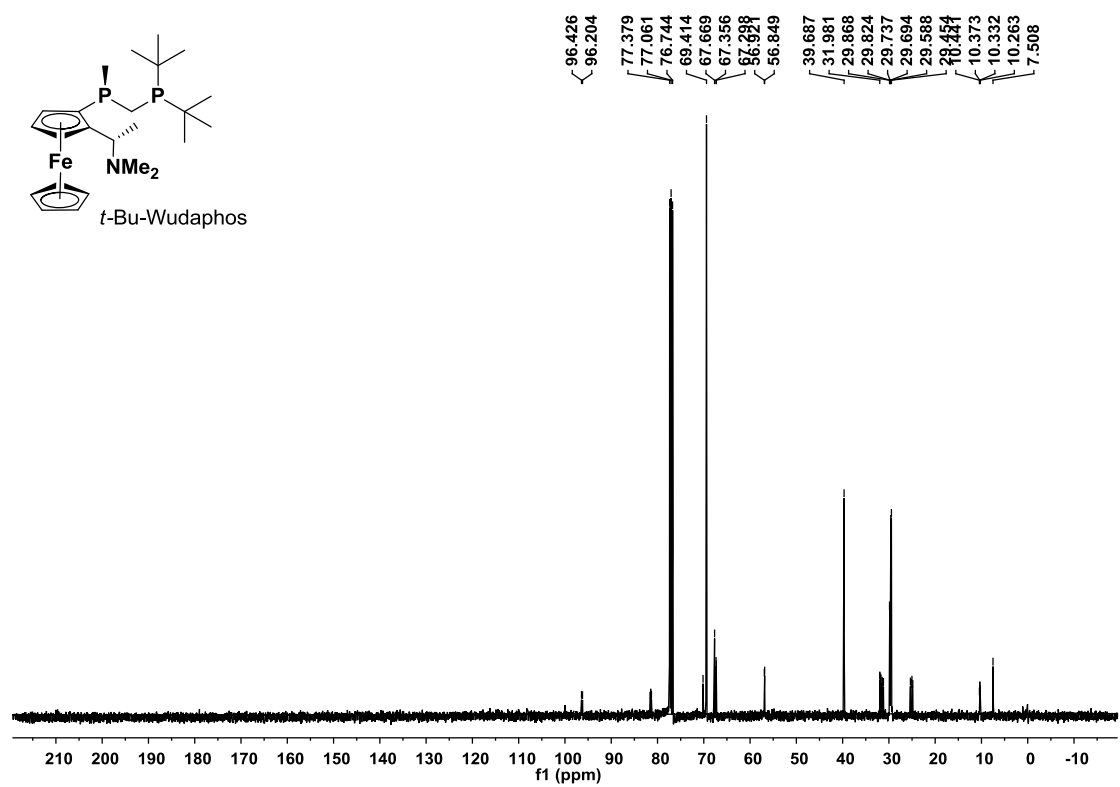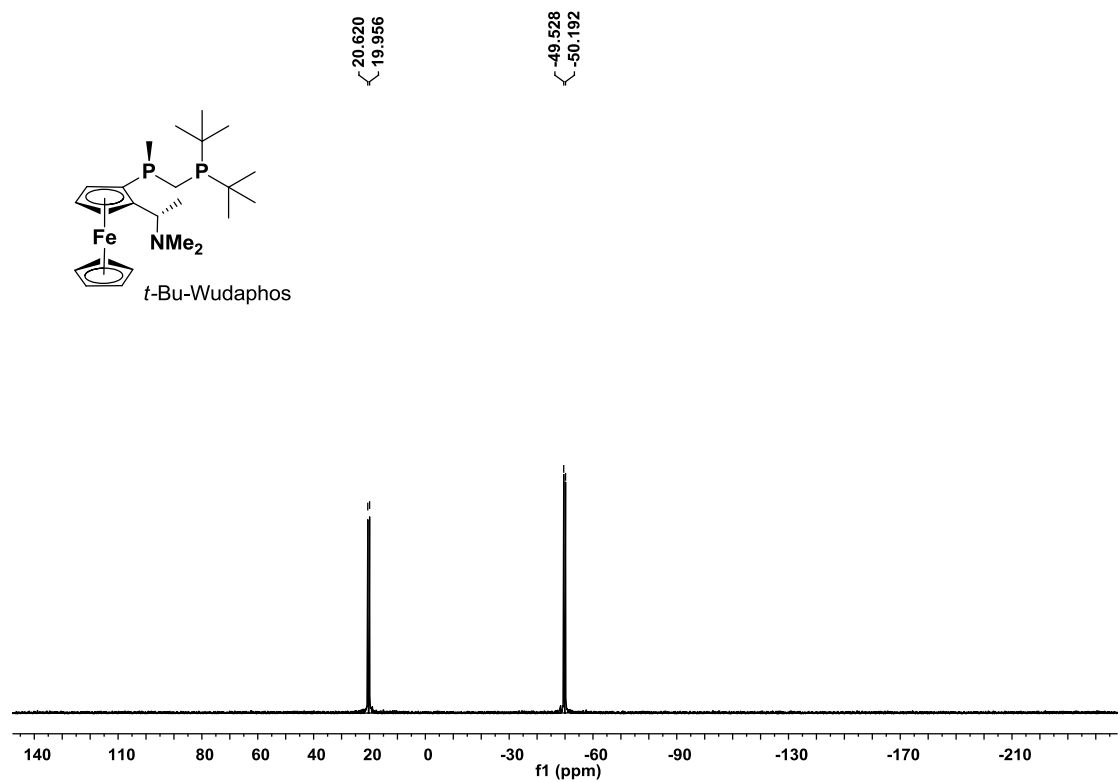

zhangmu-004380  
 7.980, 7.975, 7.965, 7.955, 7.410, 7.410, 7.093, 7.074, 7.023, 6.991, 5.805, 3.966

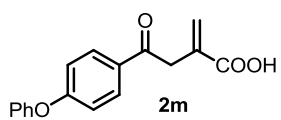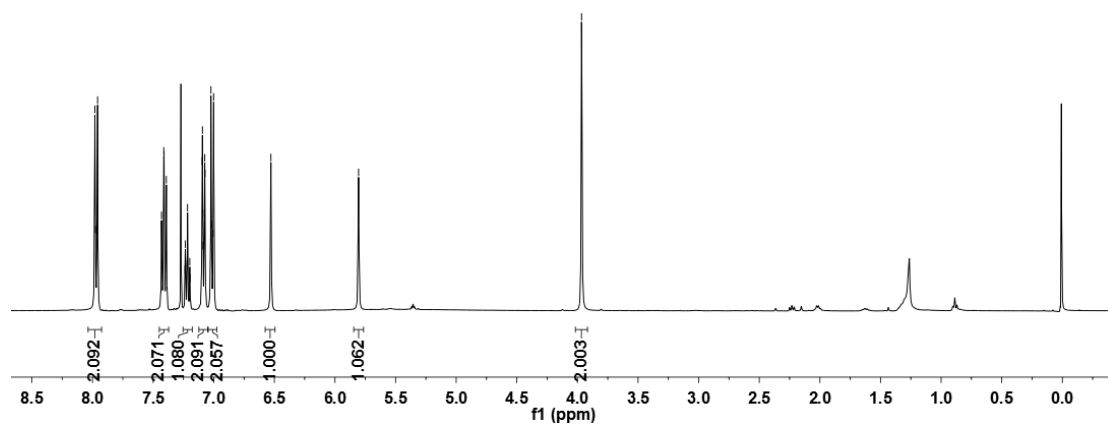

zhangmu-004380  
 195.500, 171.529, 162.511, 155.626, 134.331, 131.178, 131.086, 130.877, 130.357, 124.973, 120.522, 117.587, 77.617, 77.200, 76.982, 41.360

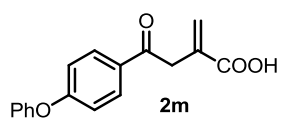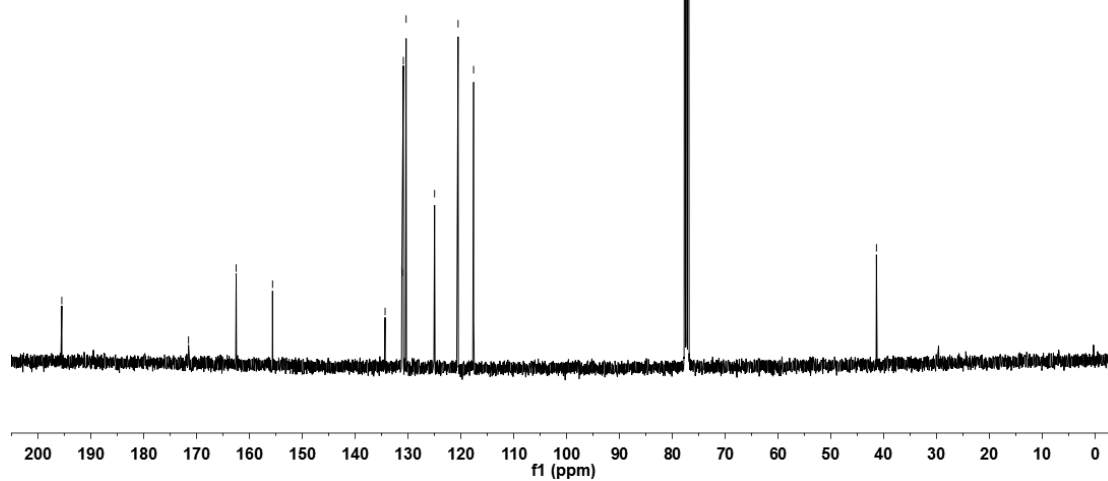

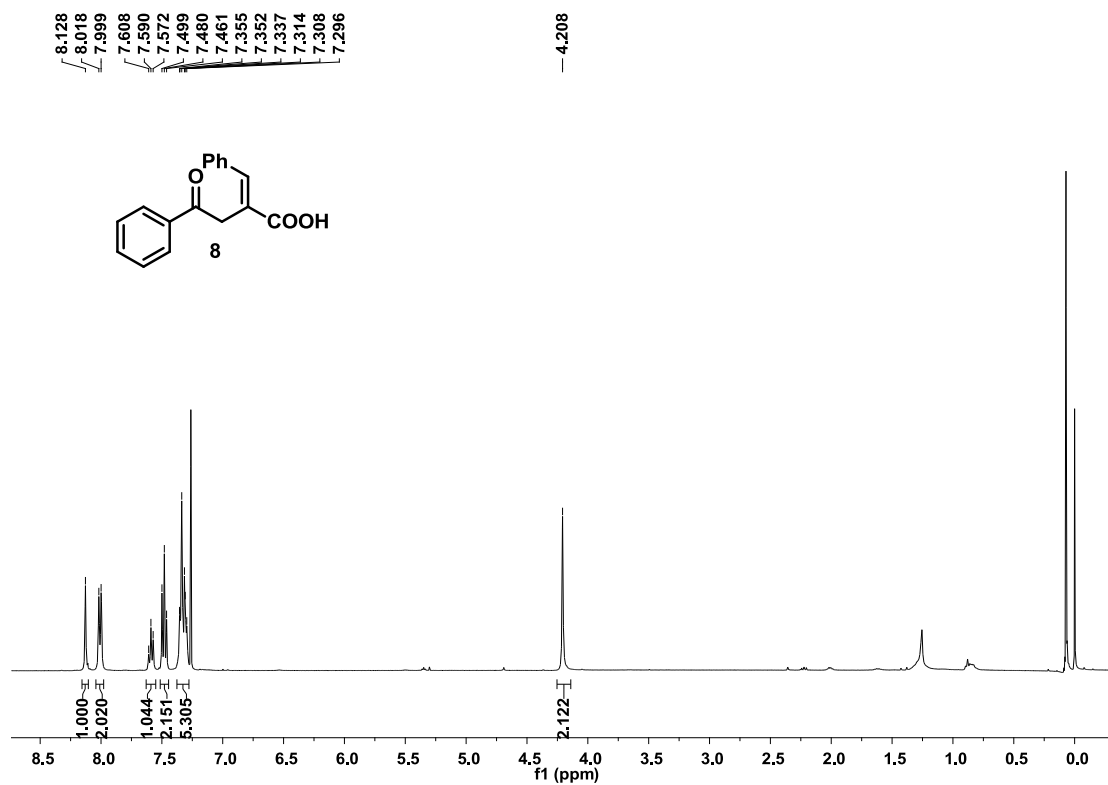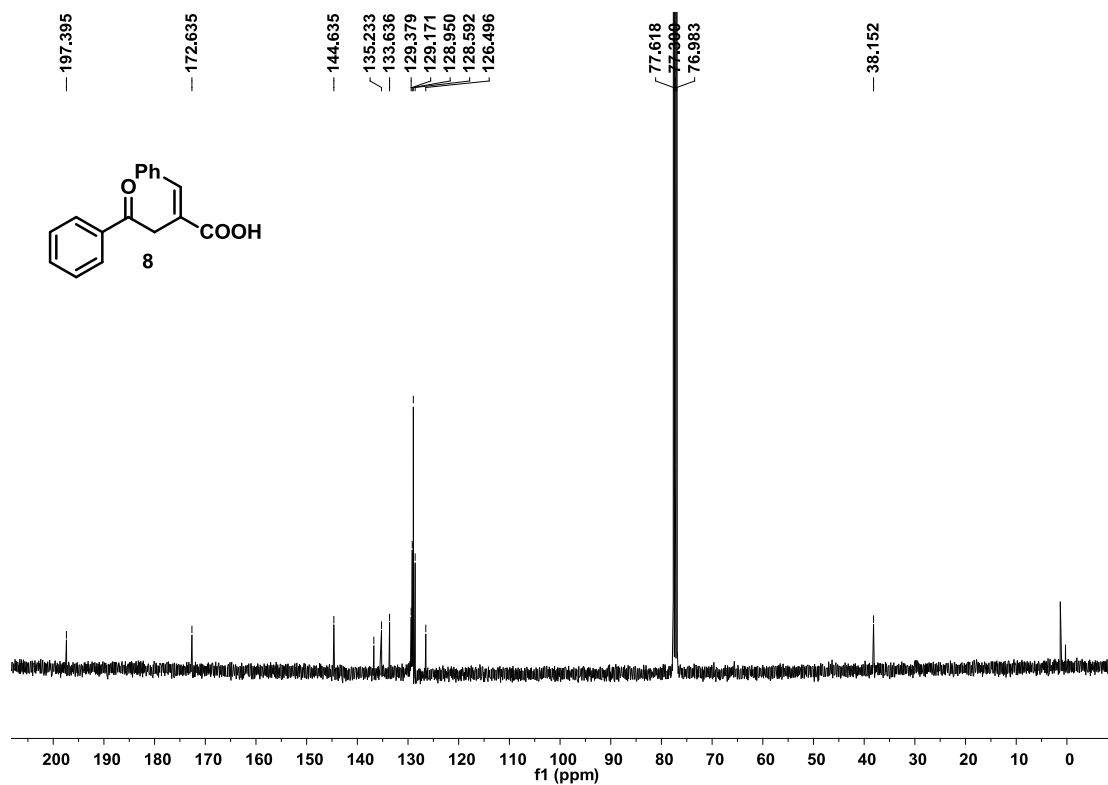

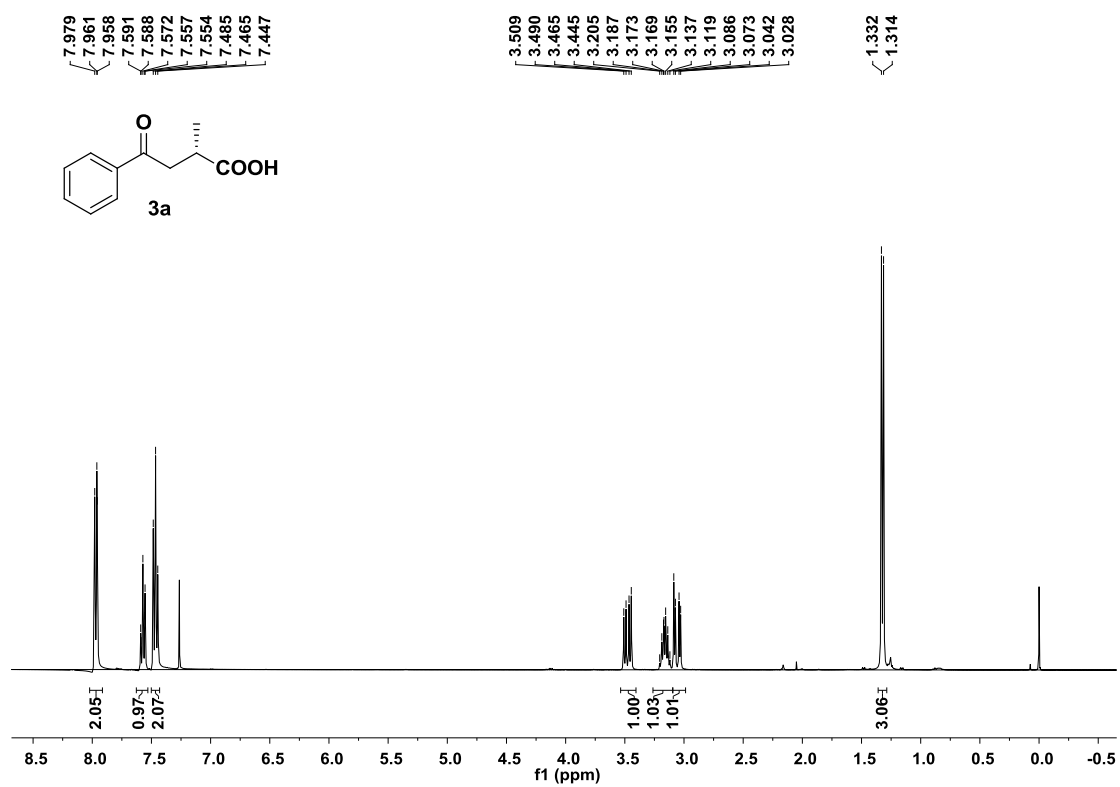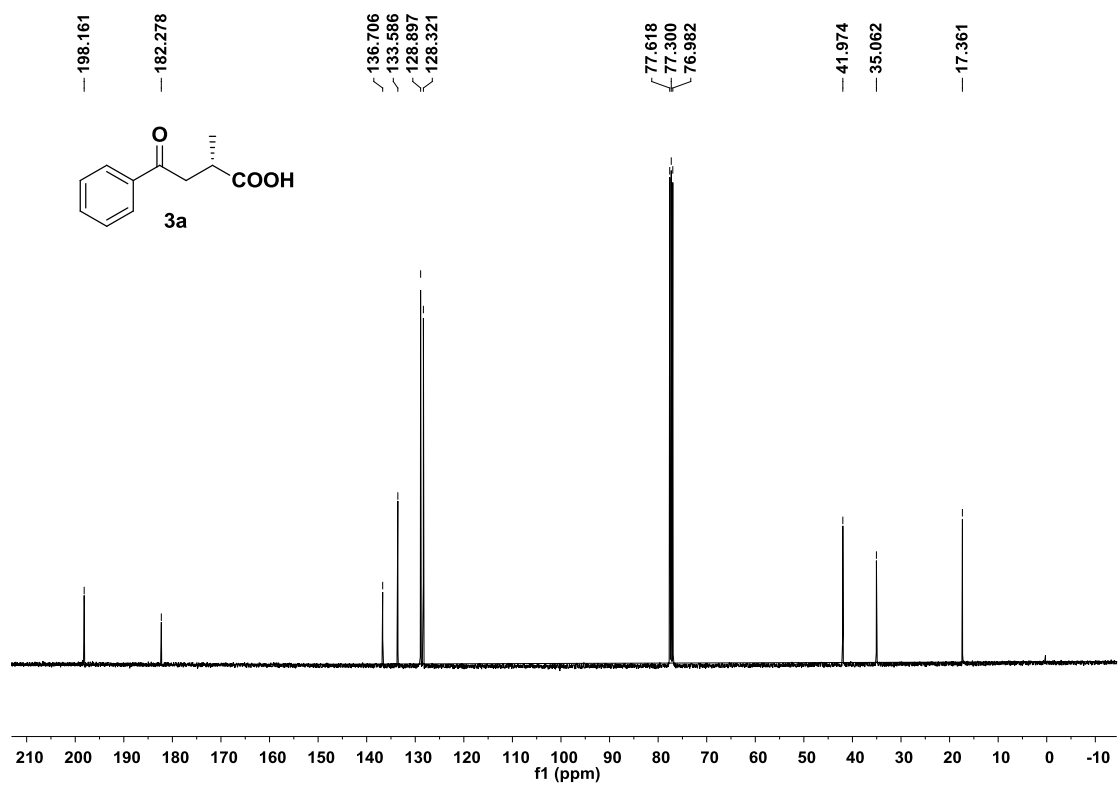

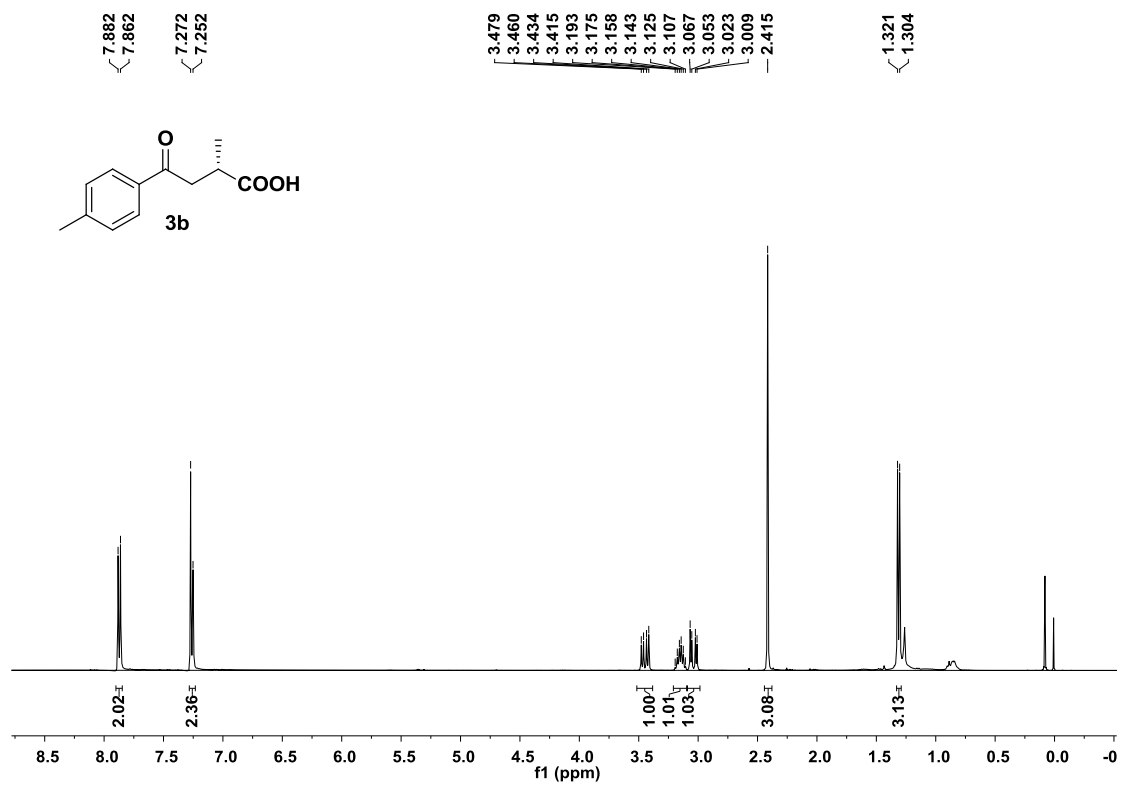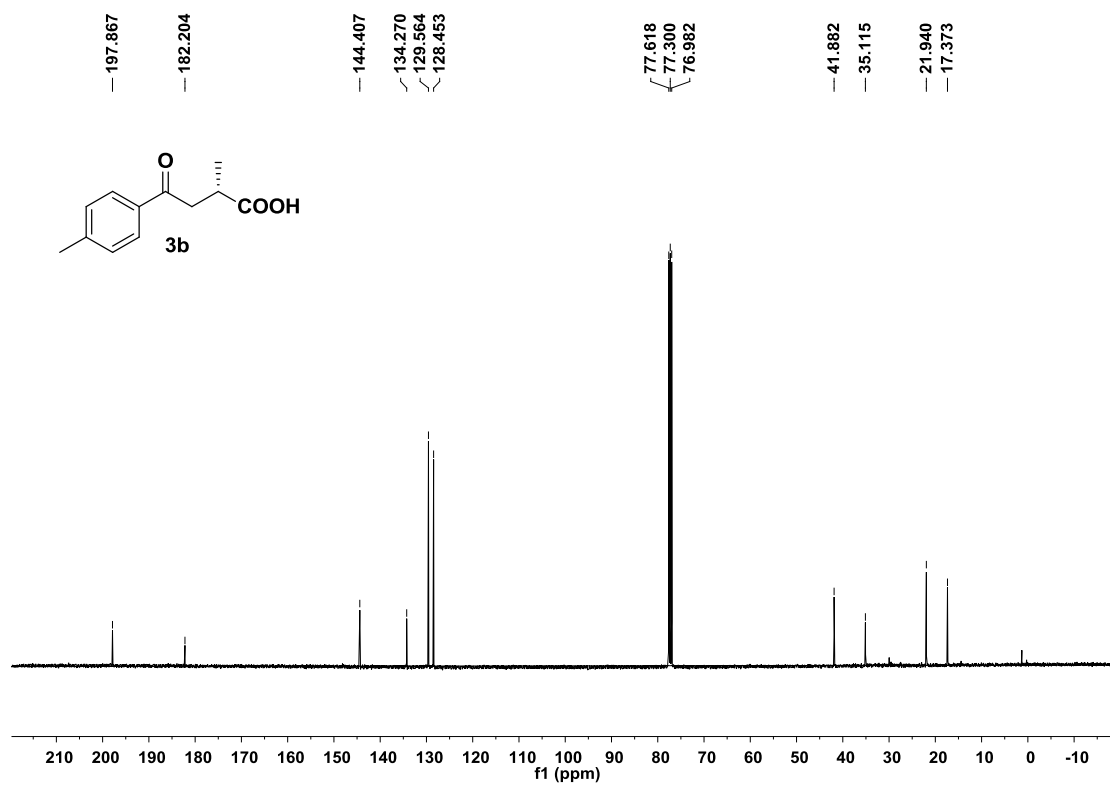



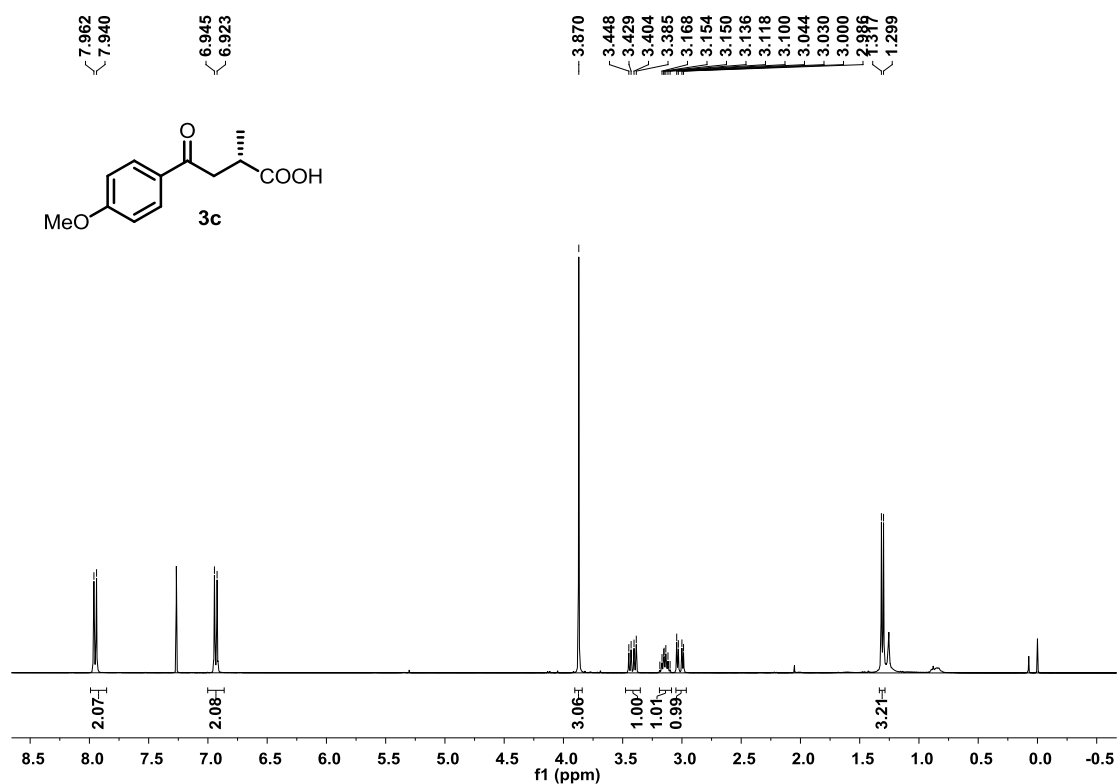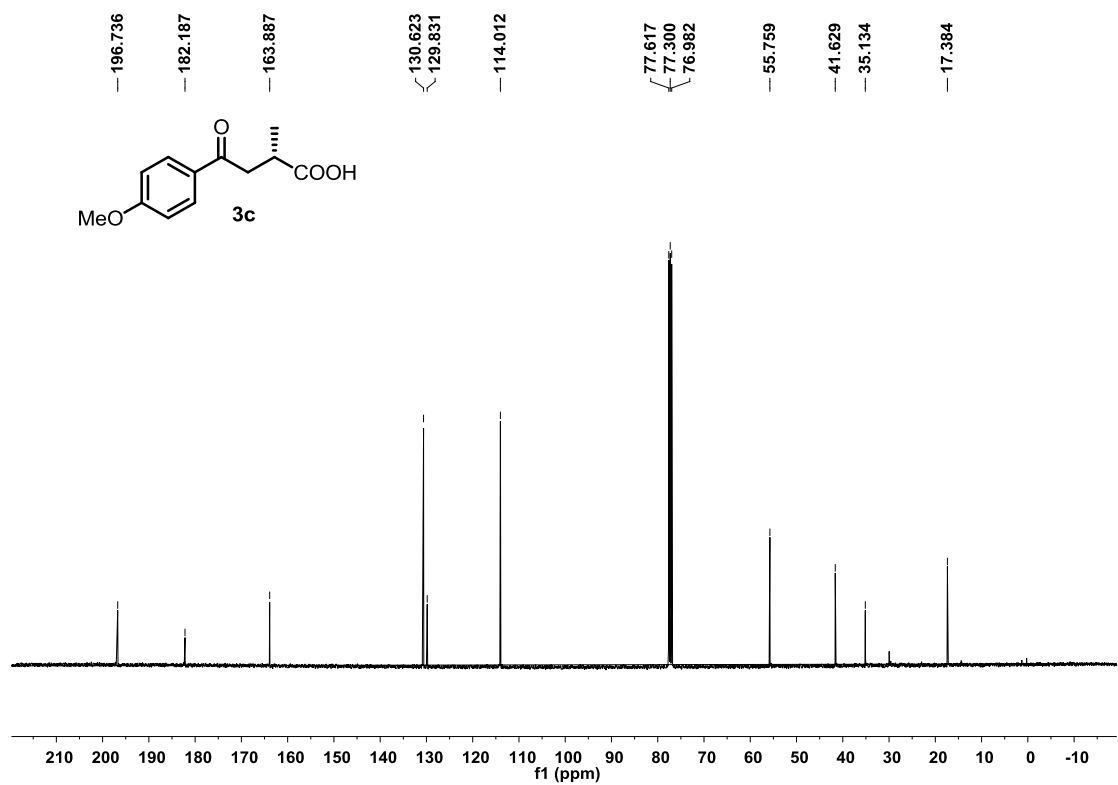

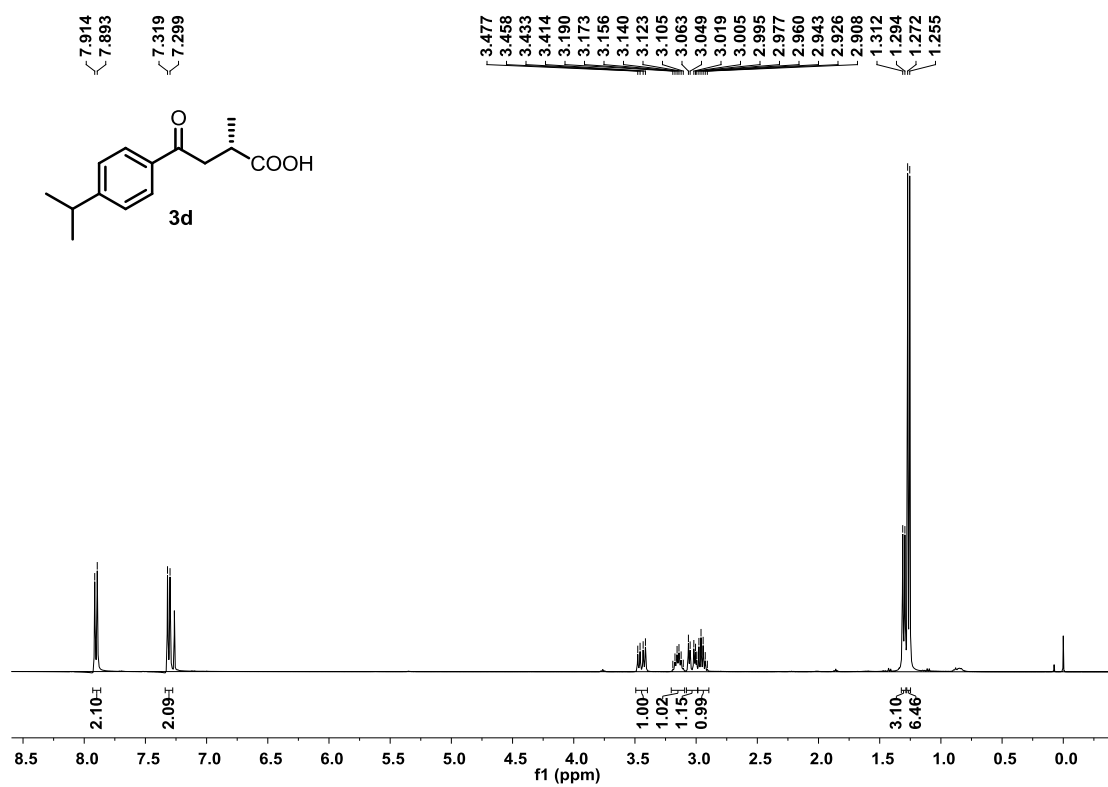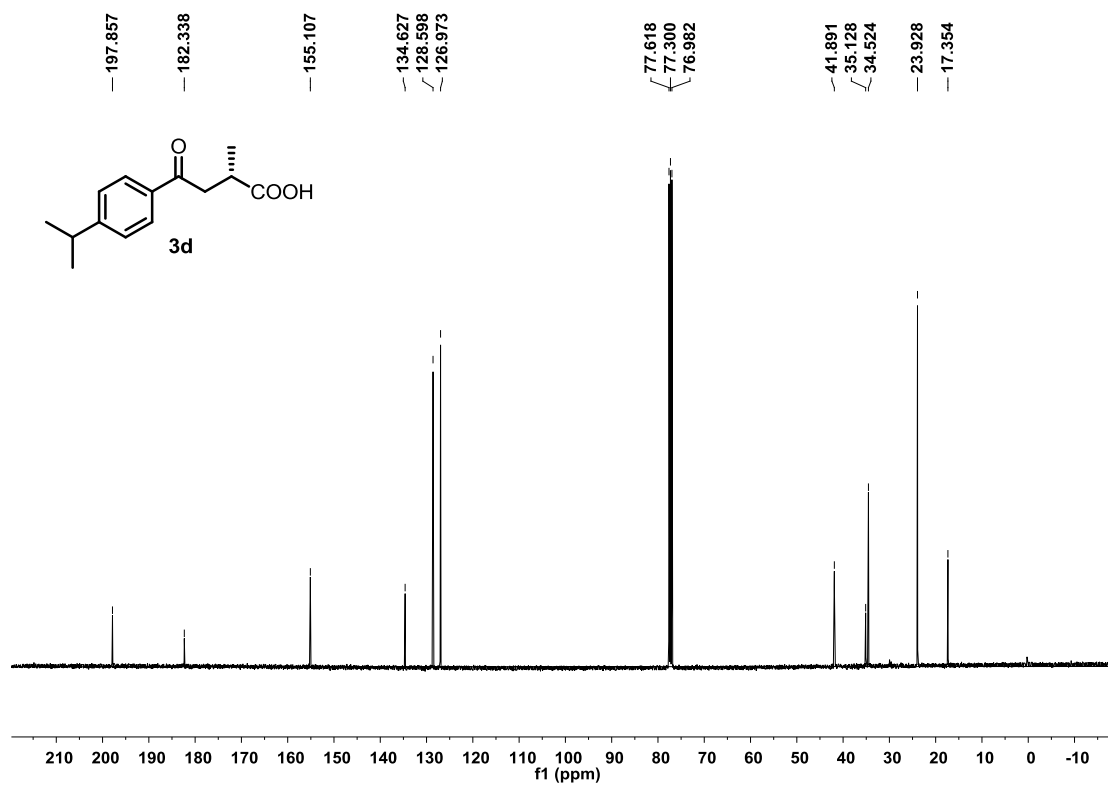

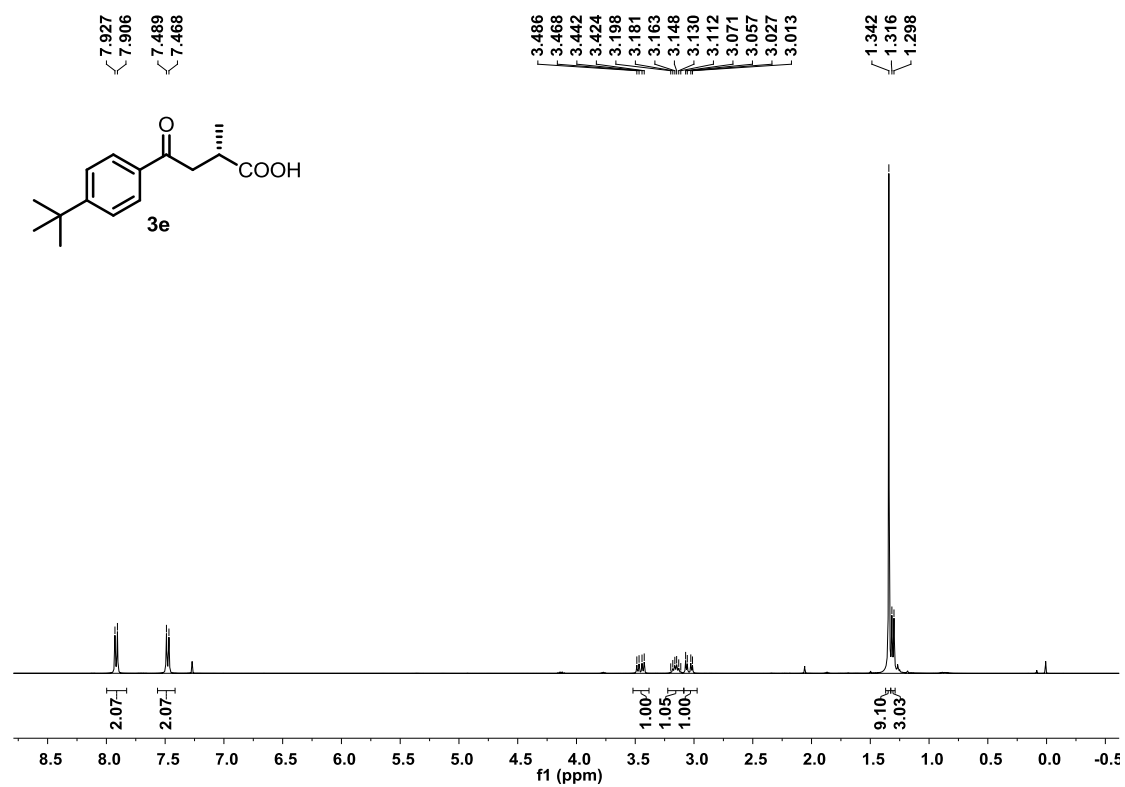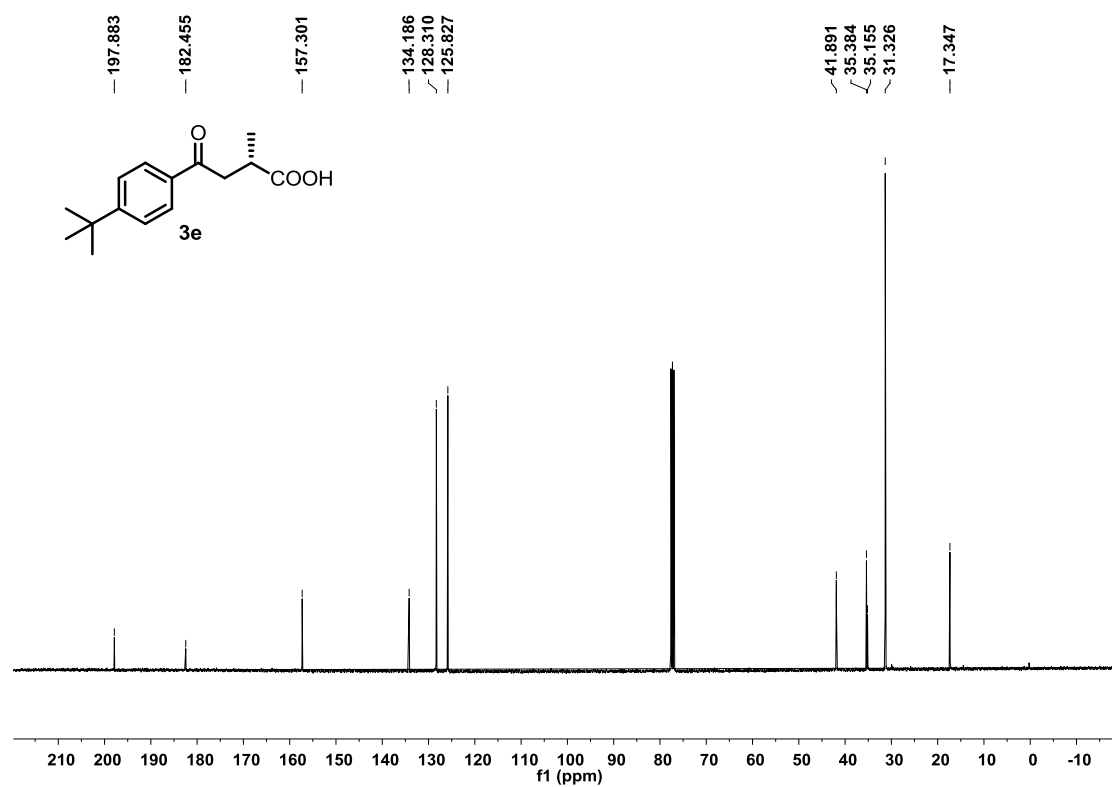

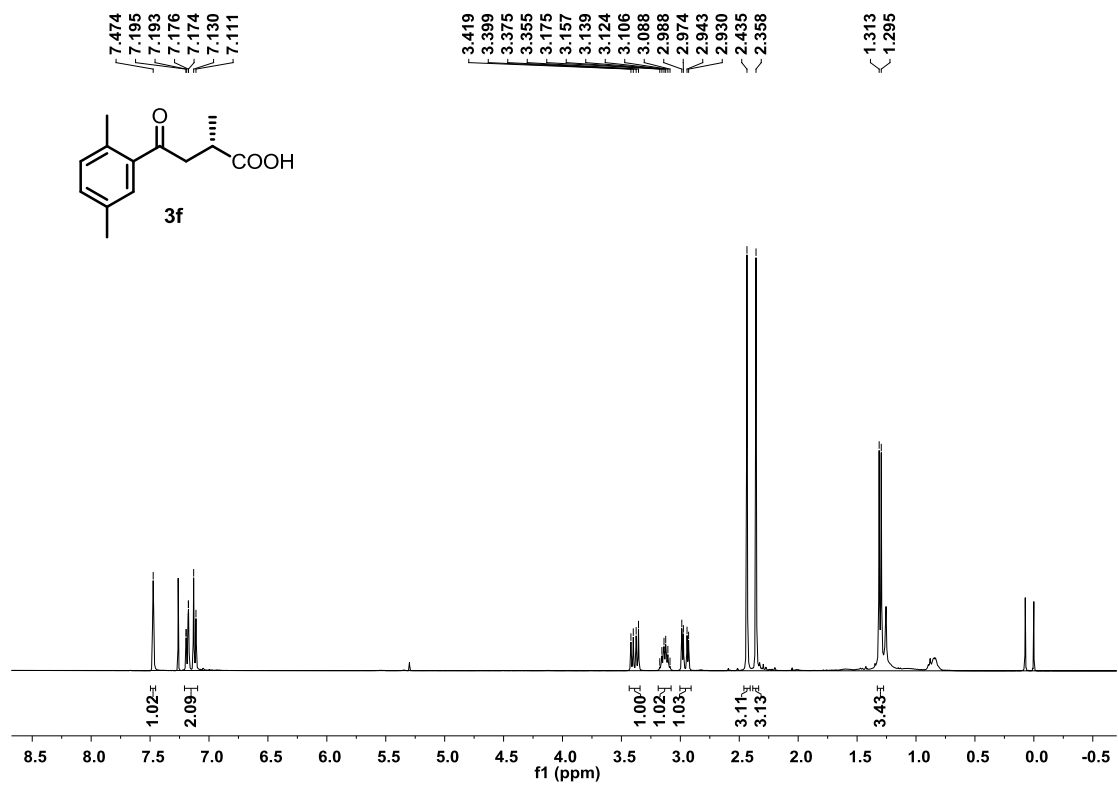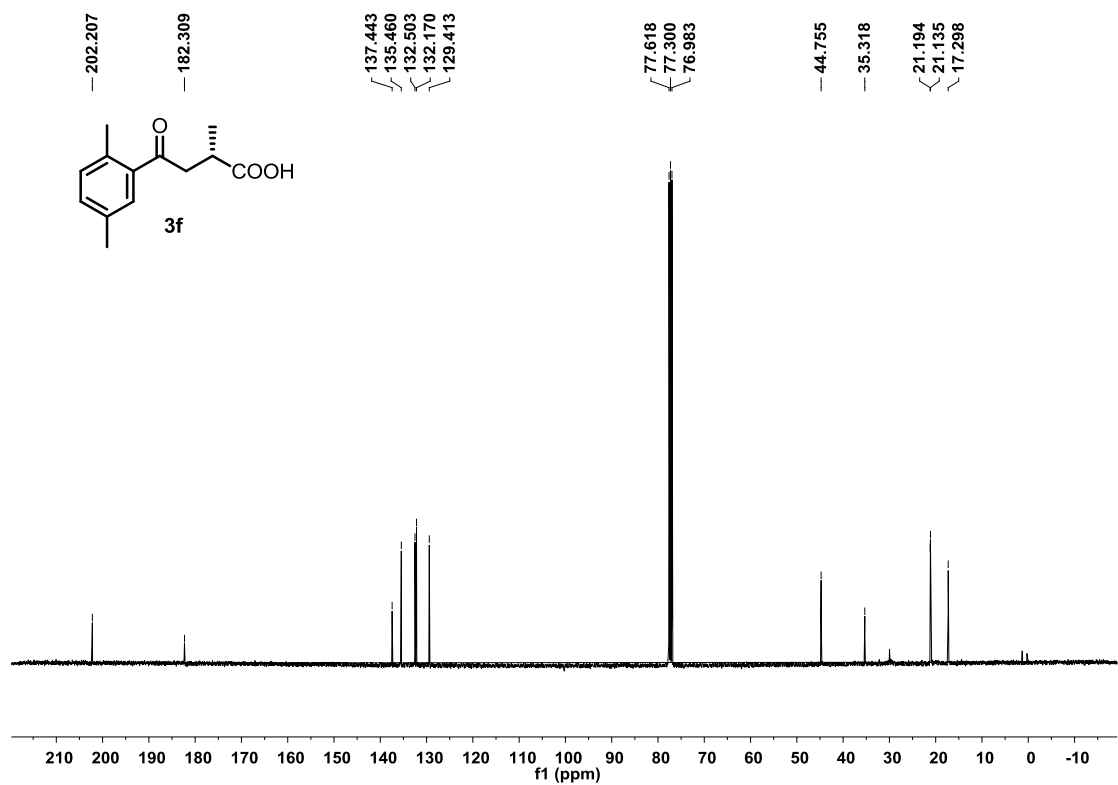

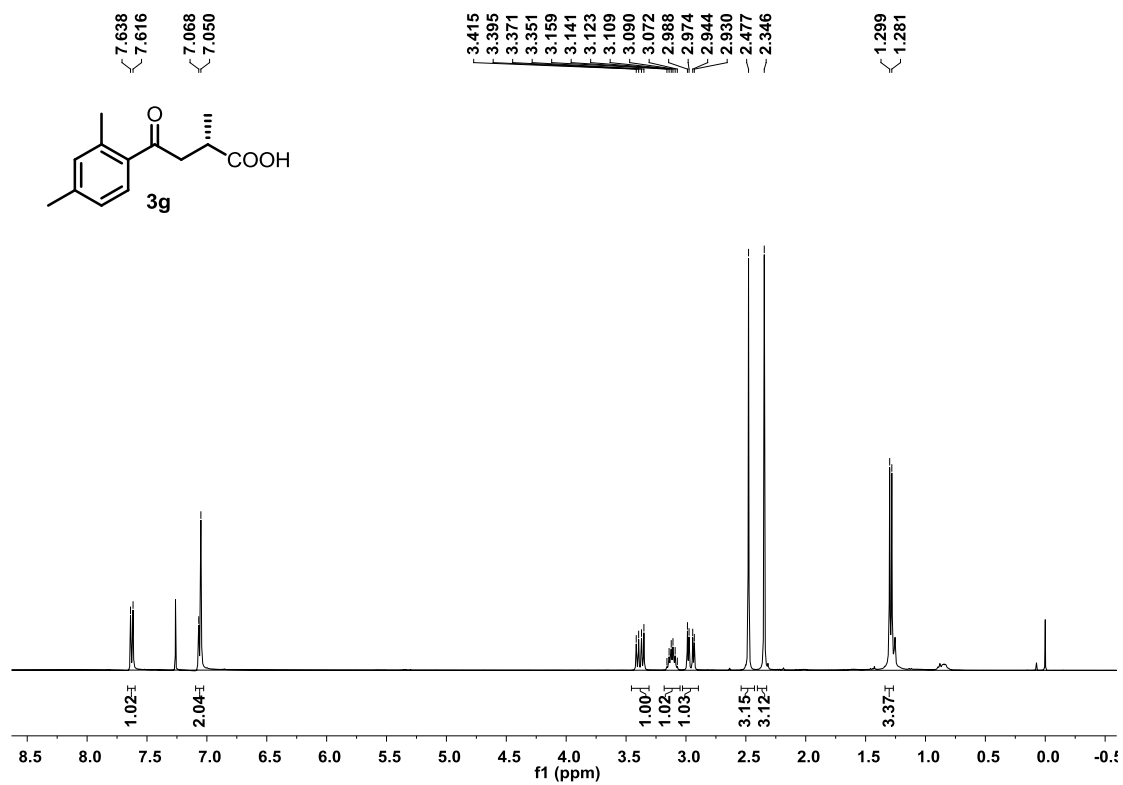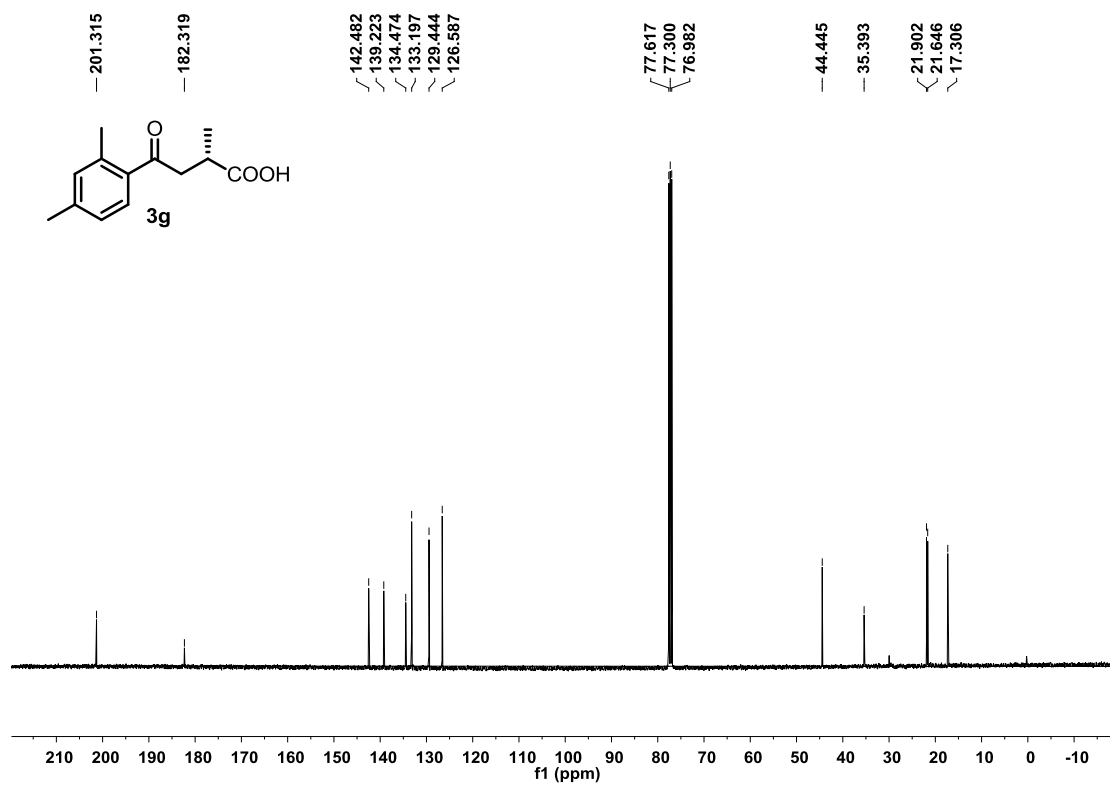

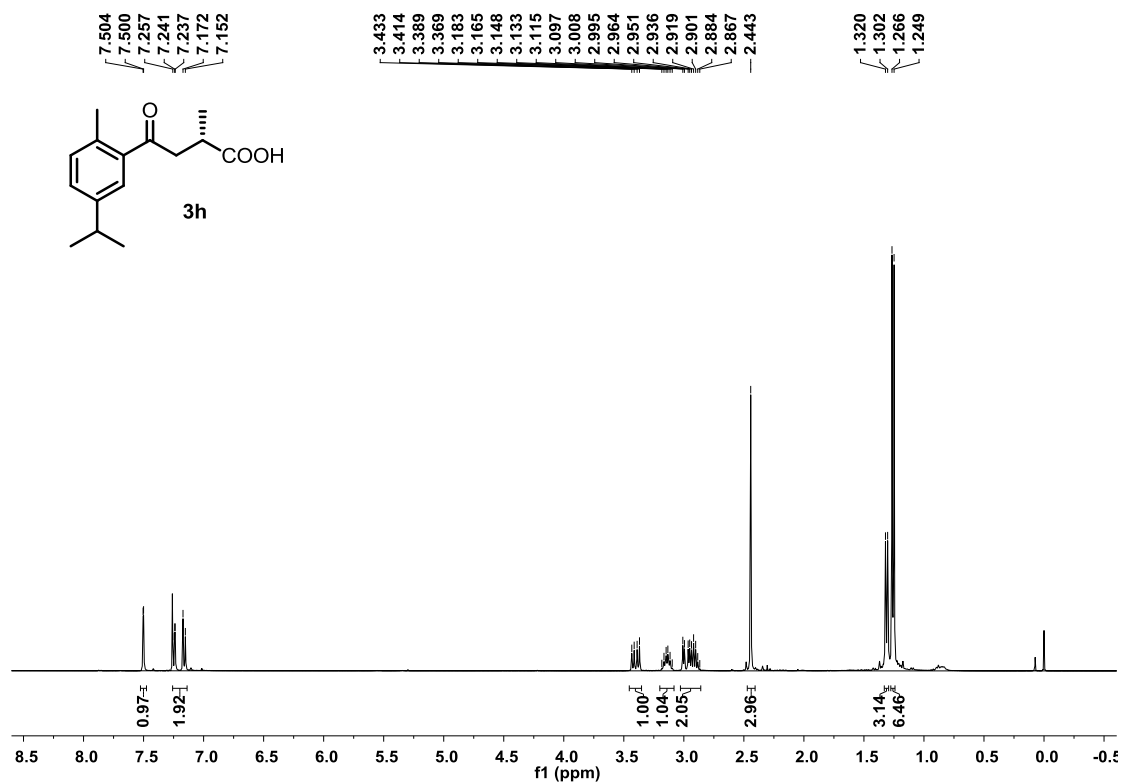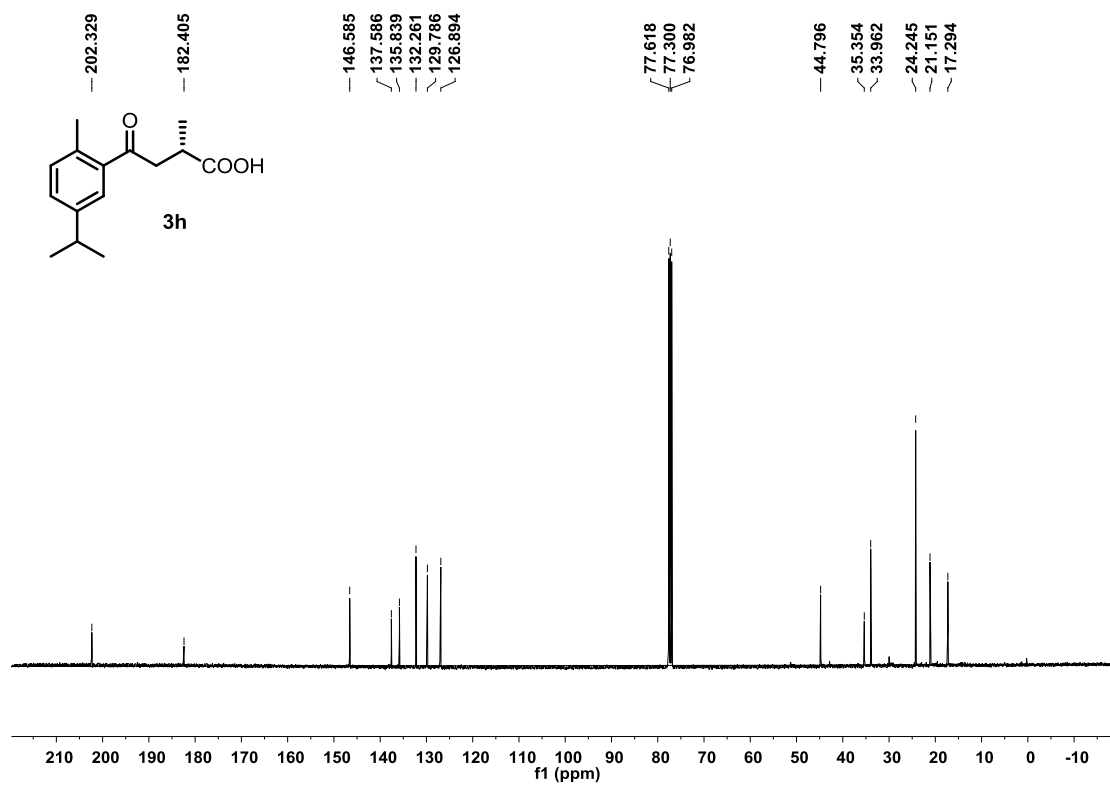

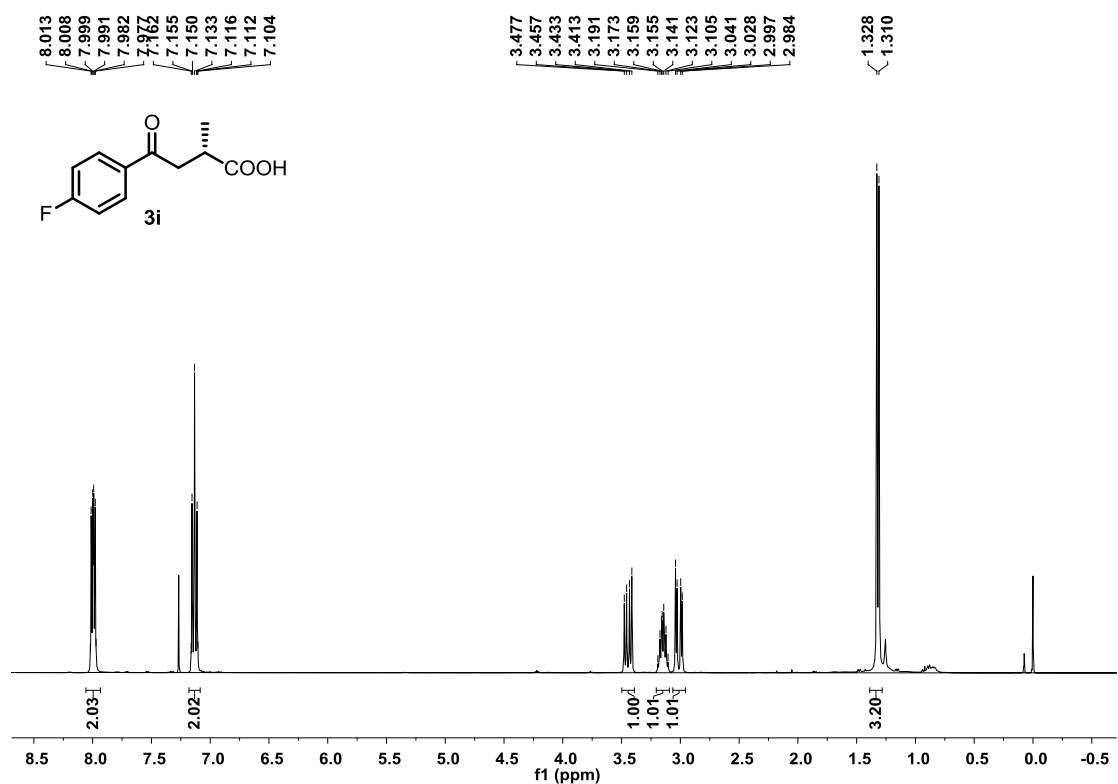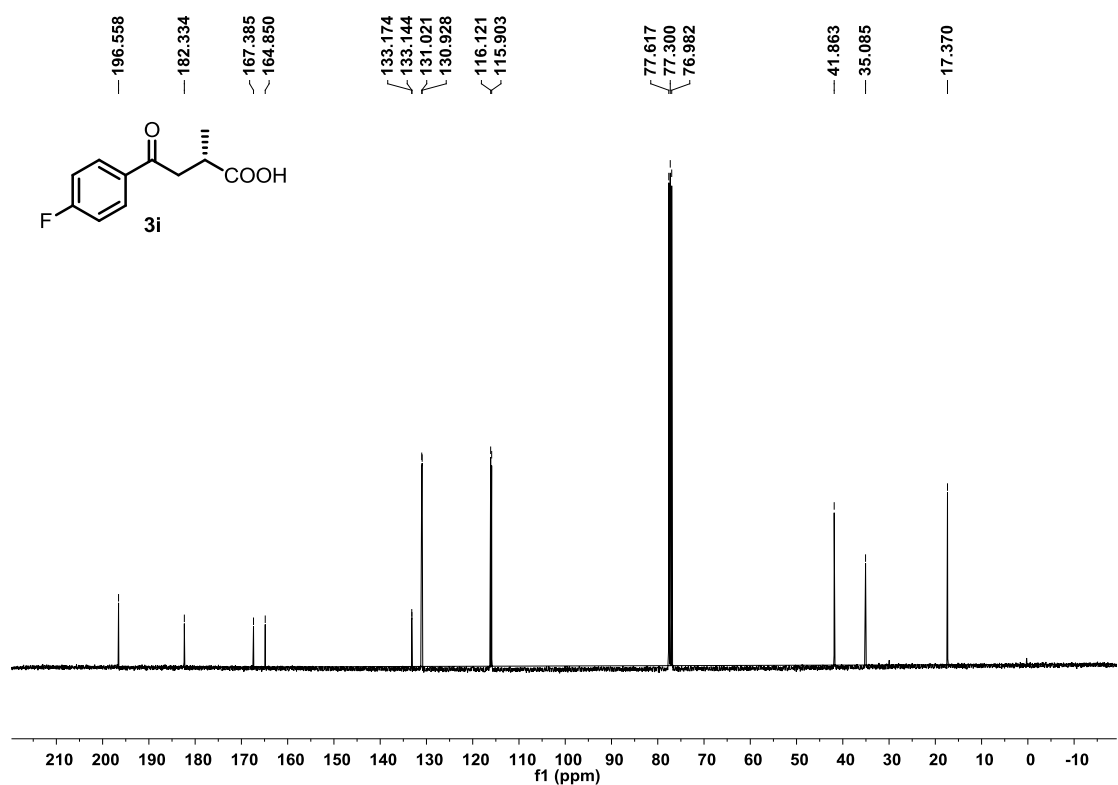

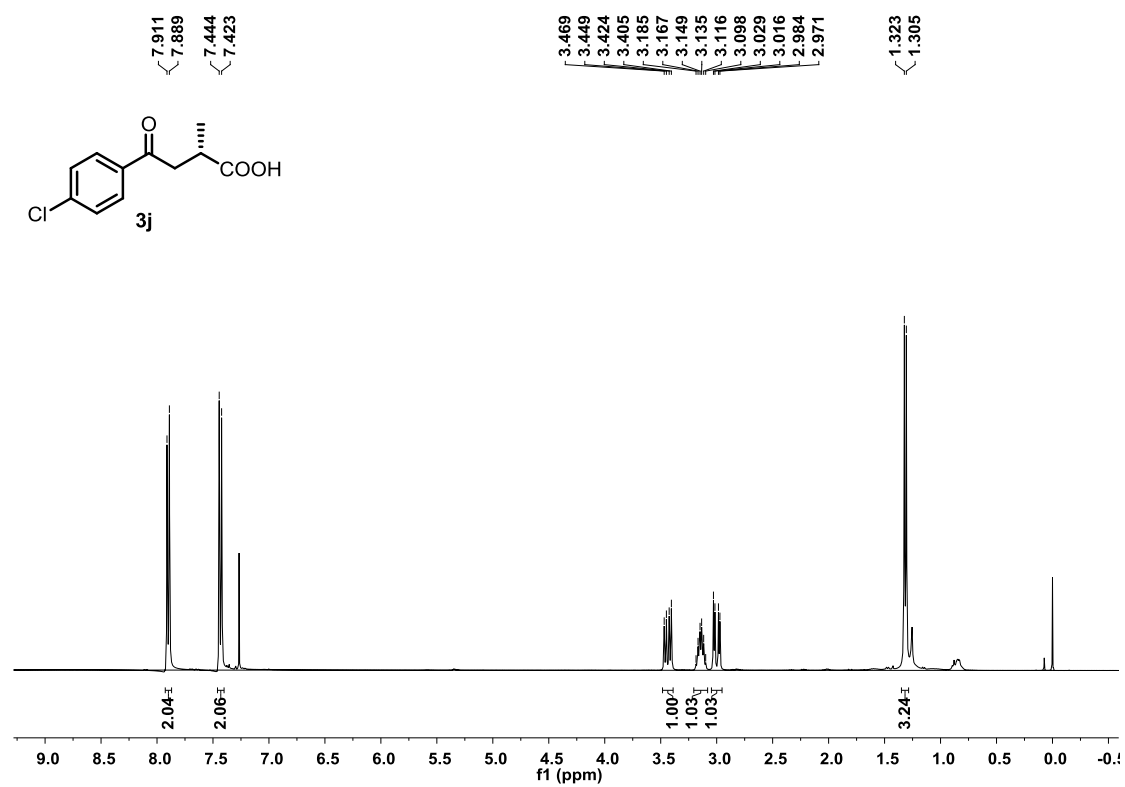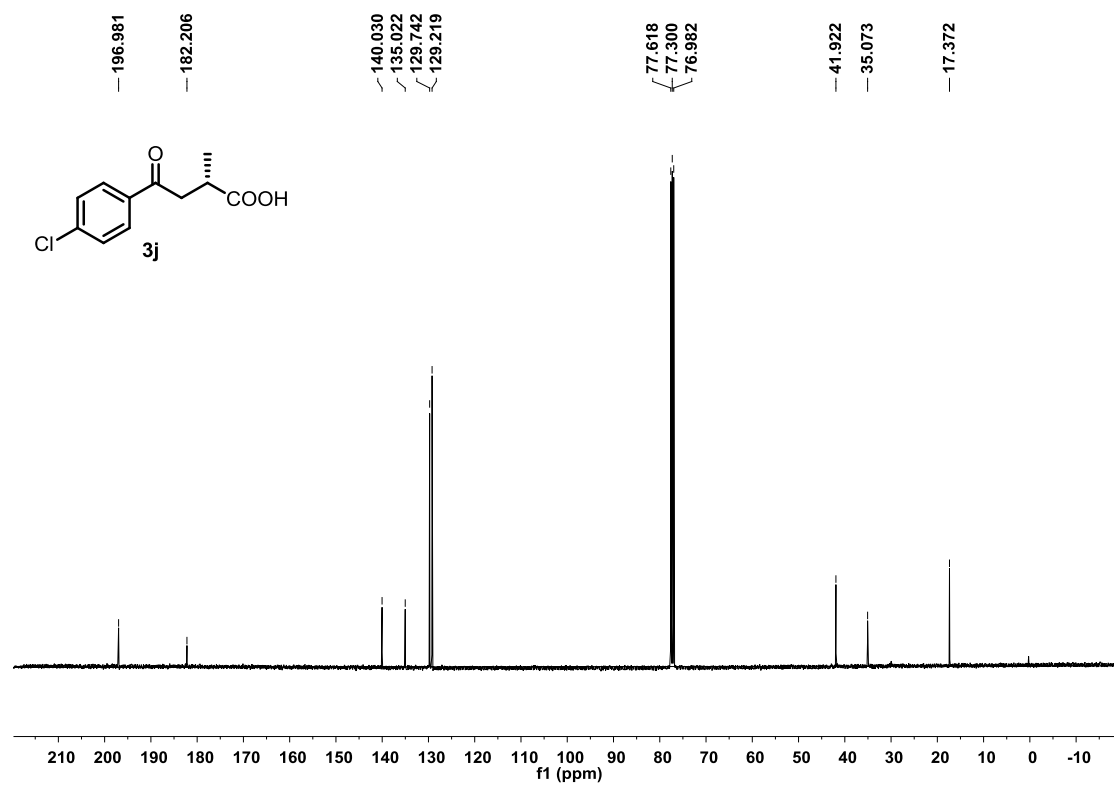



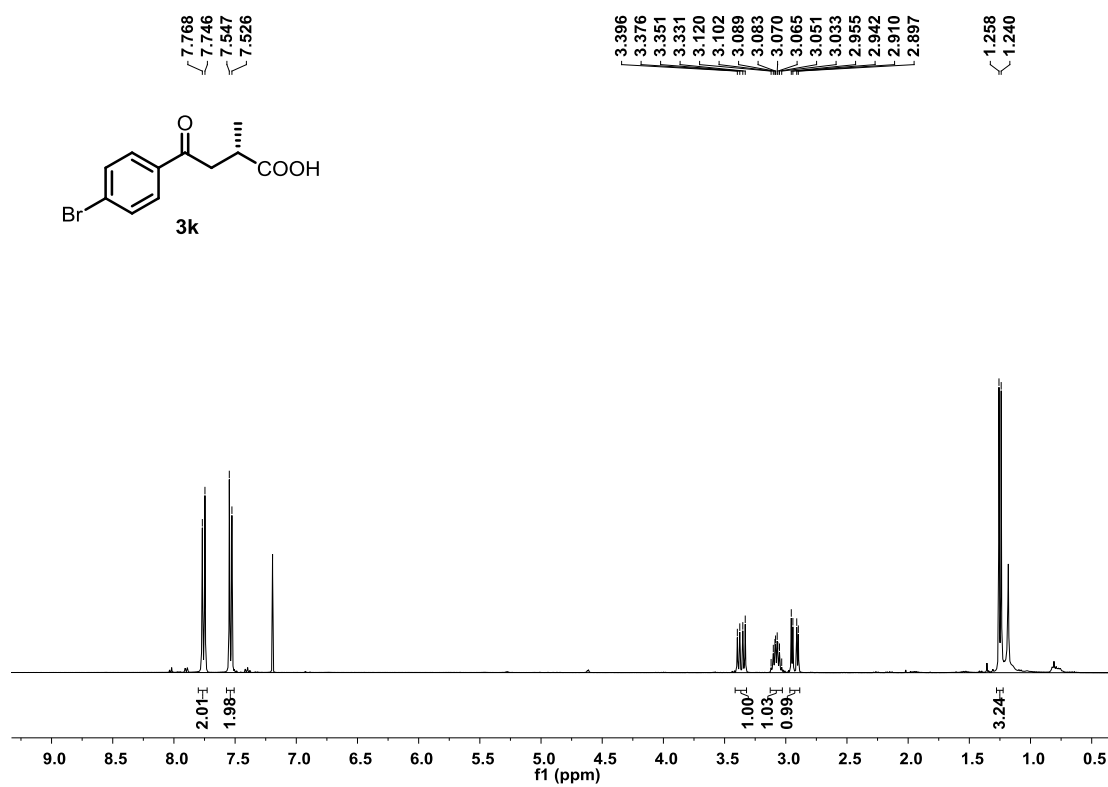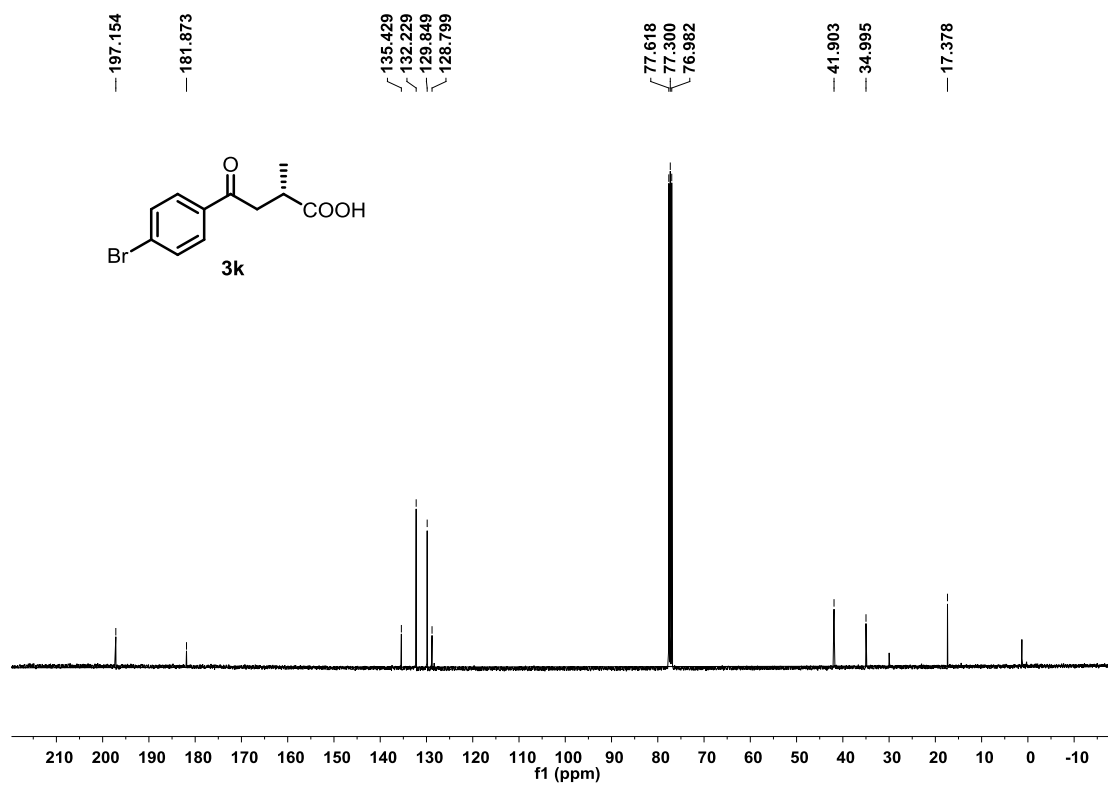

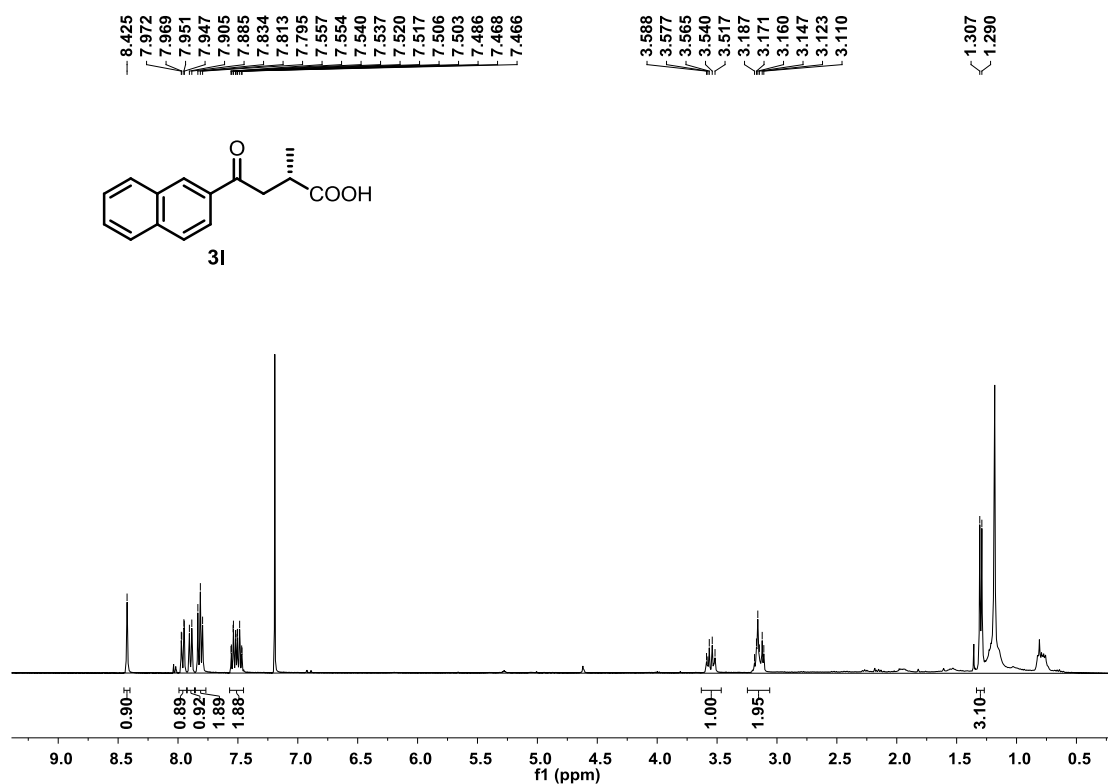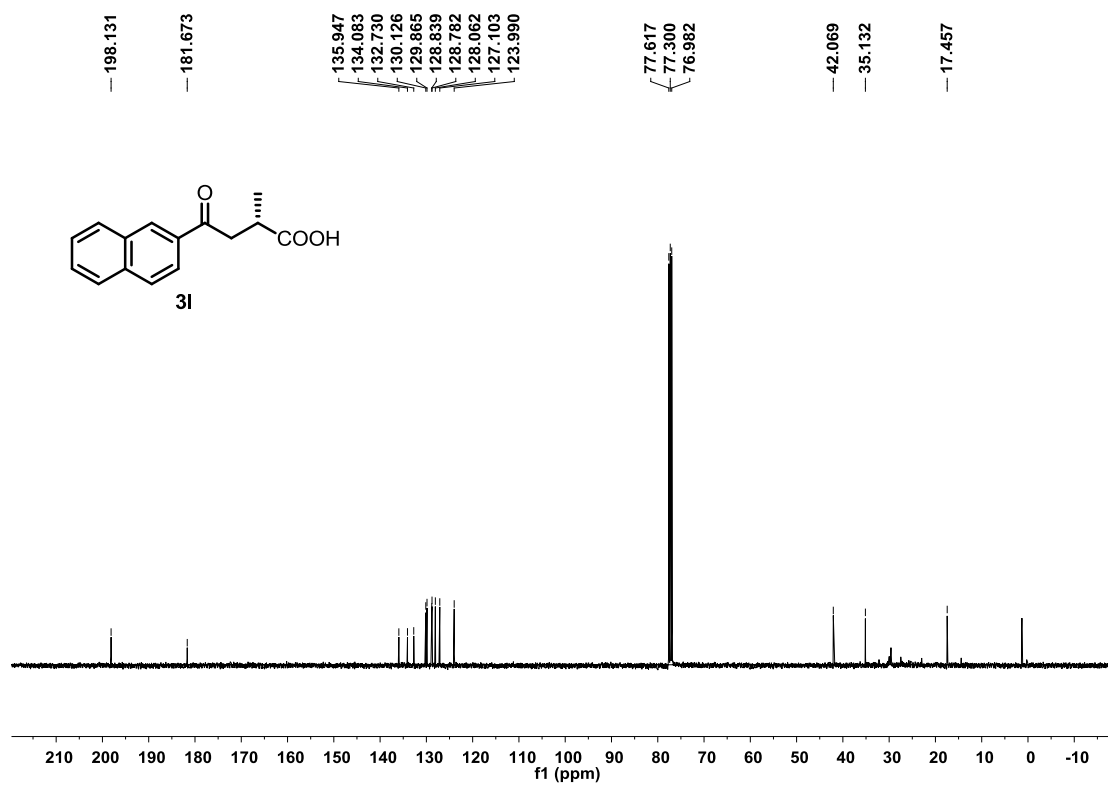

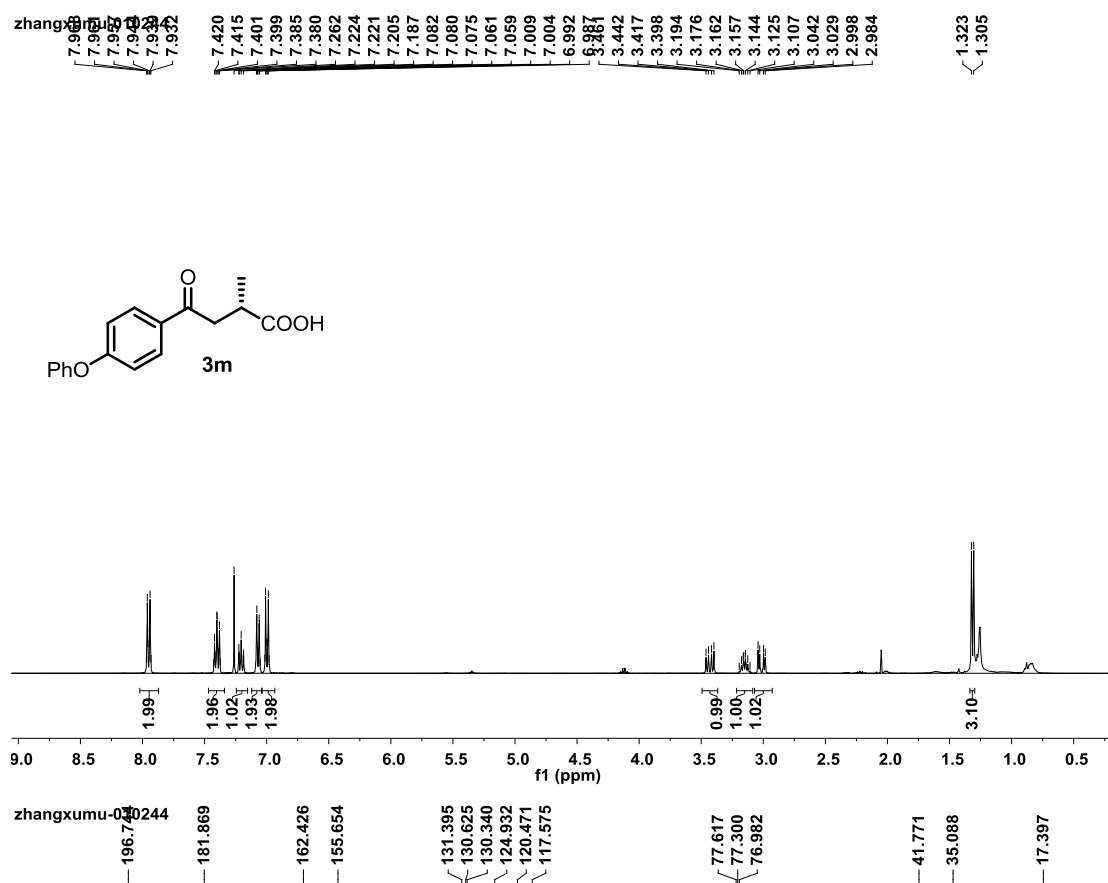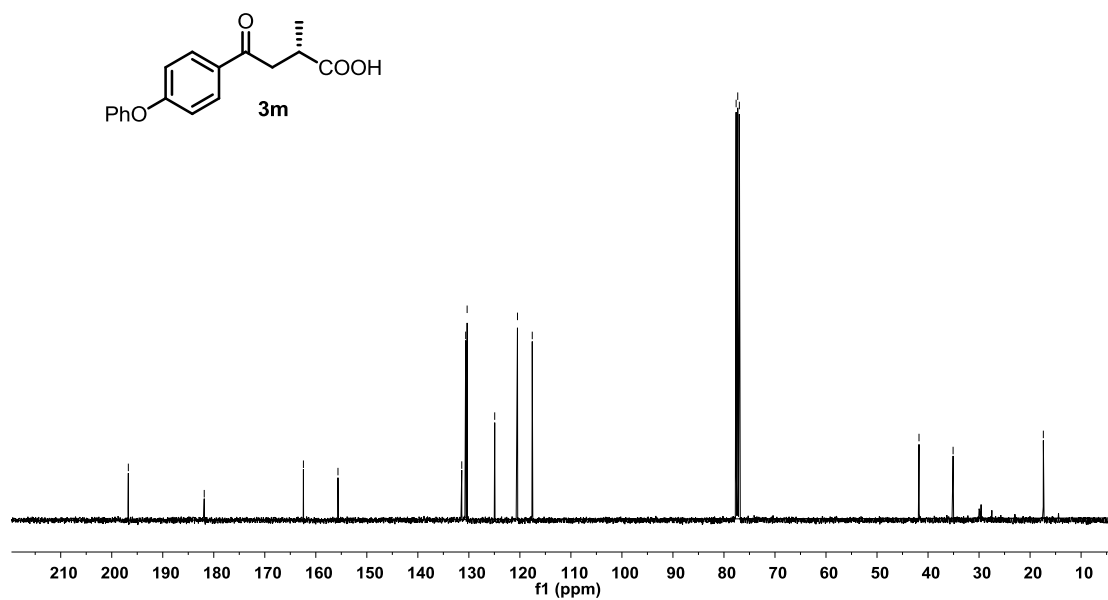

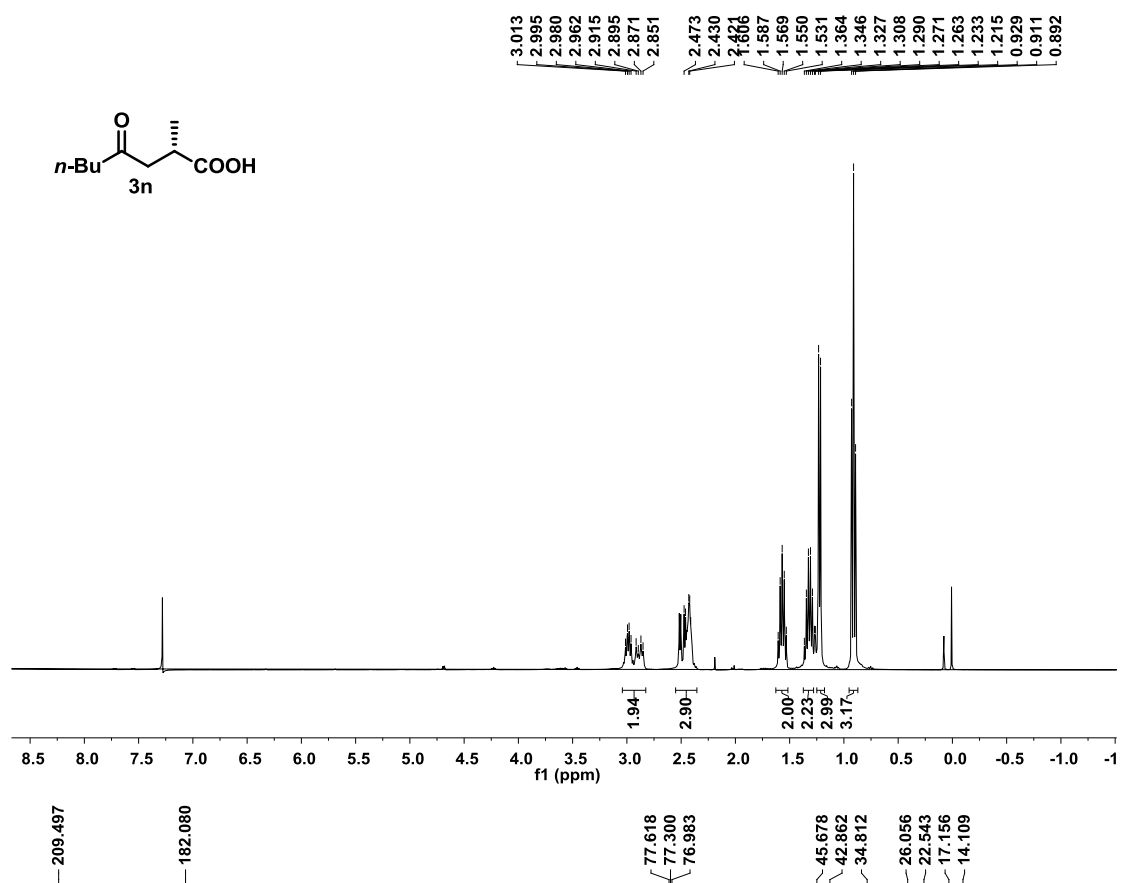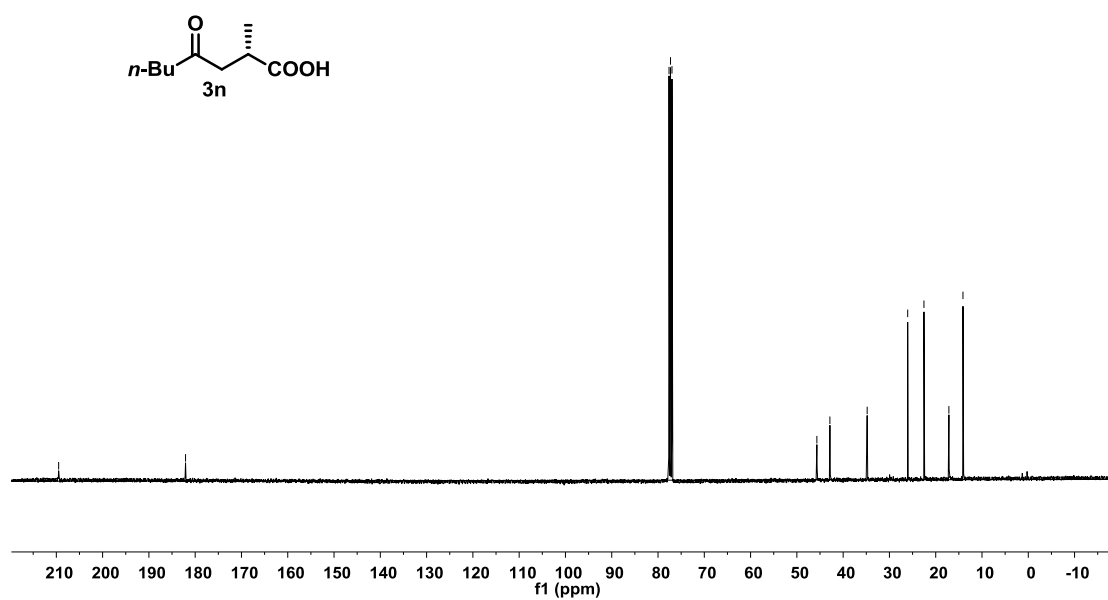

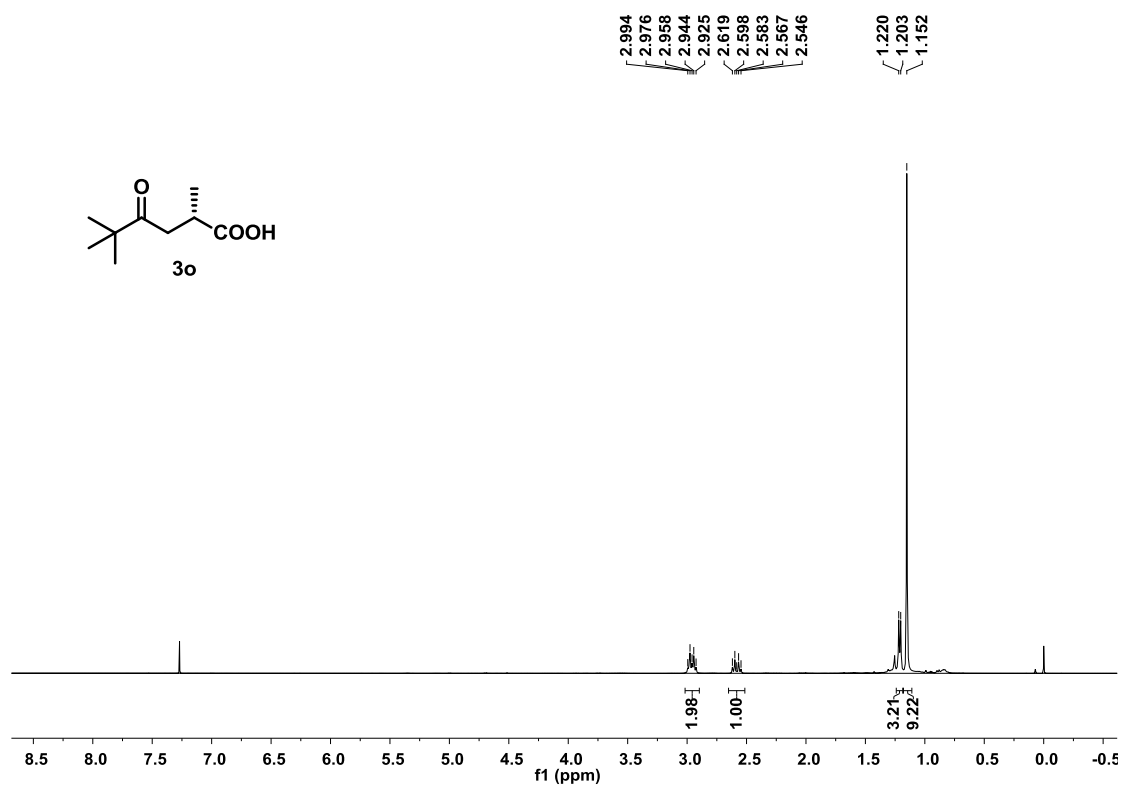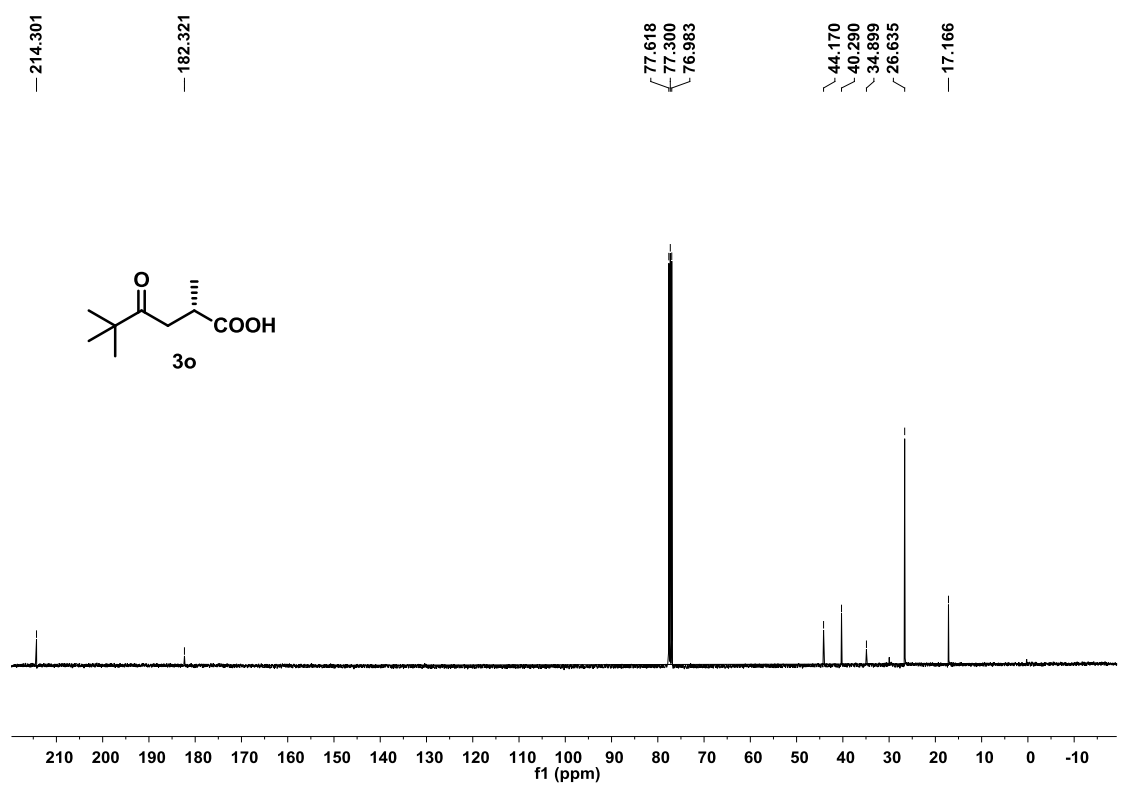

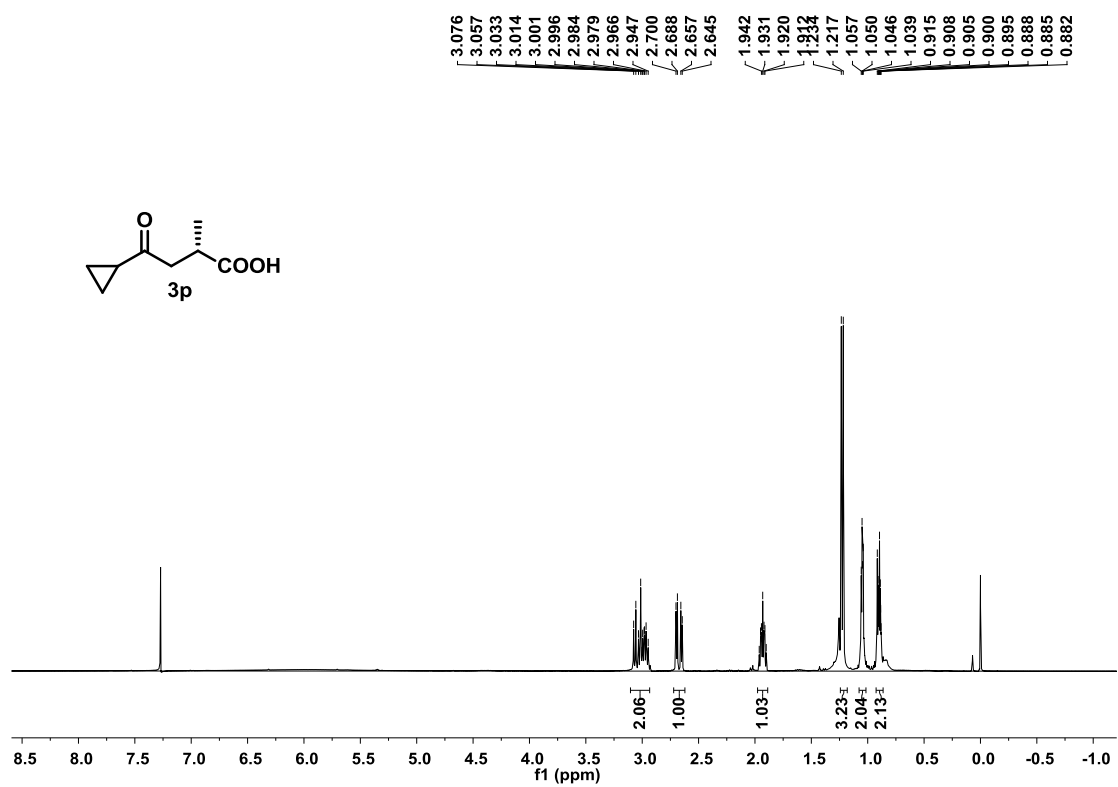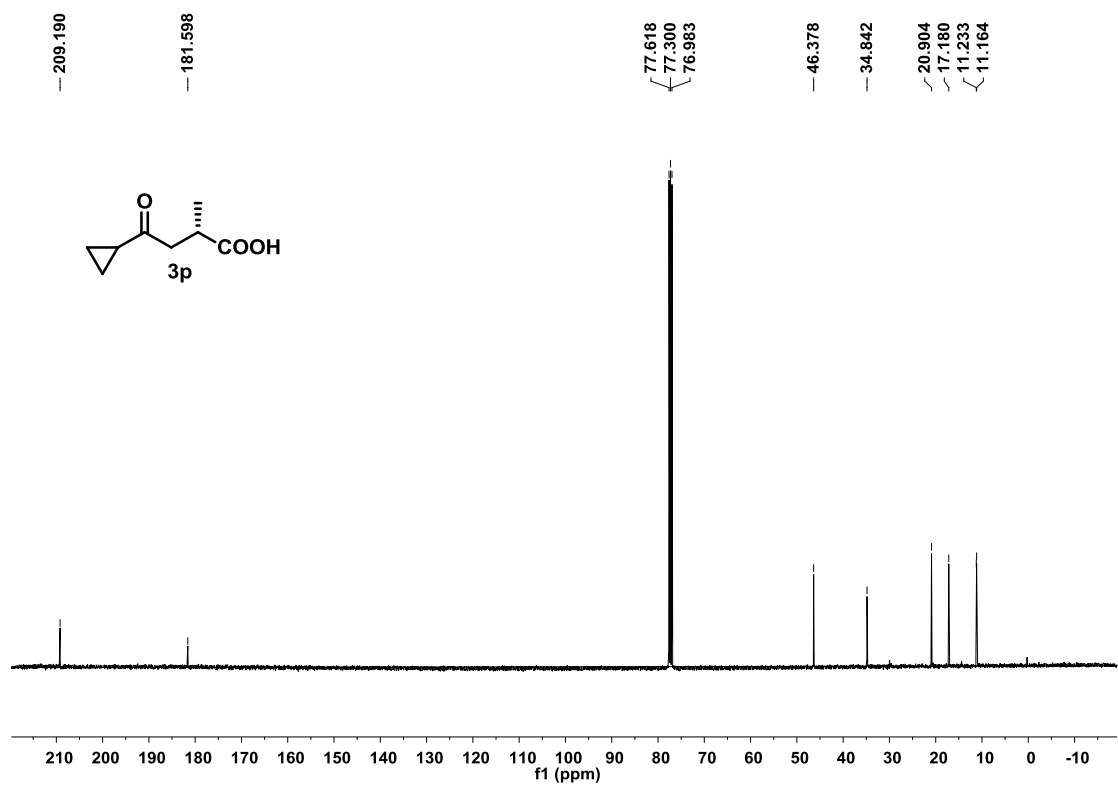

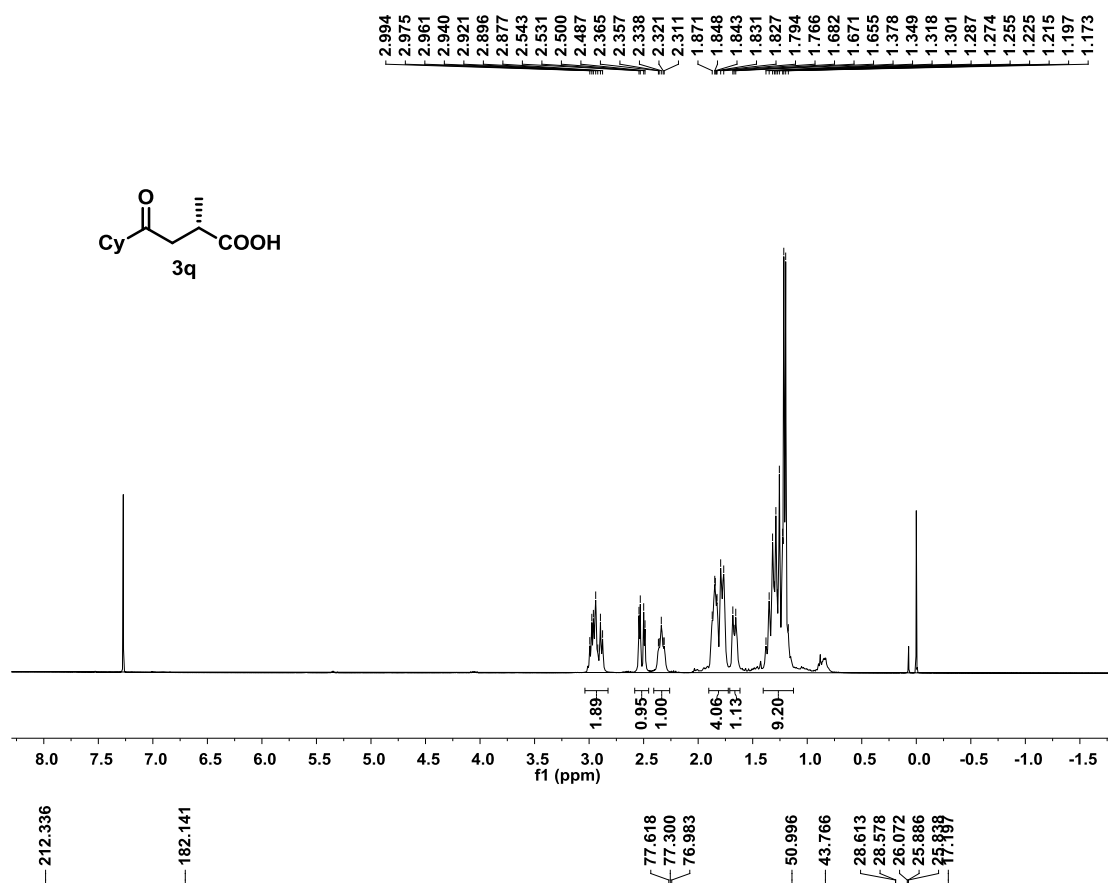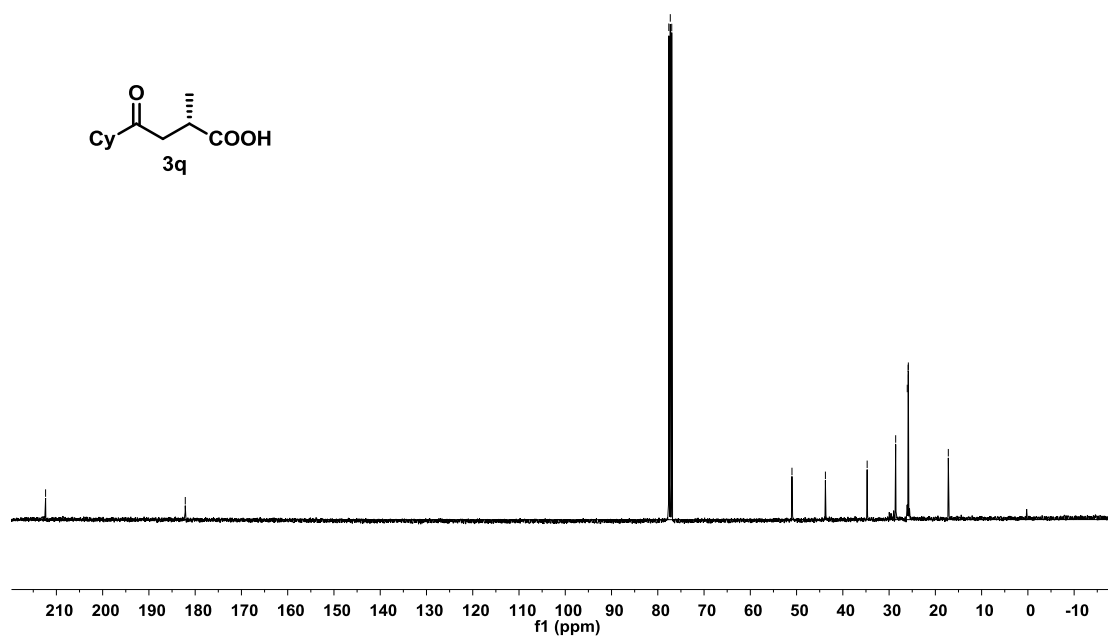

zhangxumu-001372

3.402  
3.380  
3.350  
3.222  
3.212  
3.188  
3.177  
3.020  
3.001  
2.967  
2.948  
2.865  
2.845  
2.832  
2.812

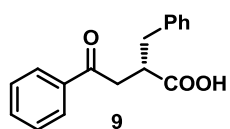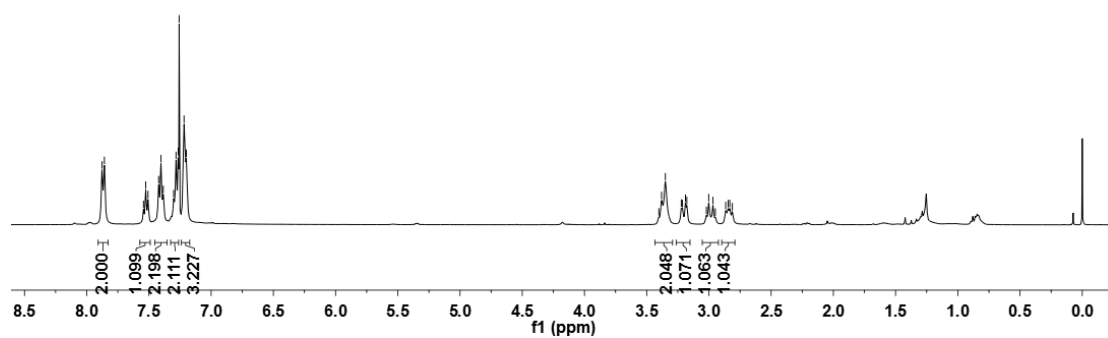

zhangxumu-001372

198.500  
180.810  
138.669  
136.654  
133.552  
129.348  
128.892  
128.822  
128.318  
126.966  
77.617  
77.400  
76.982  
42.361  
39.210  
37.654

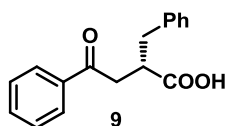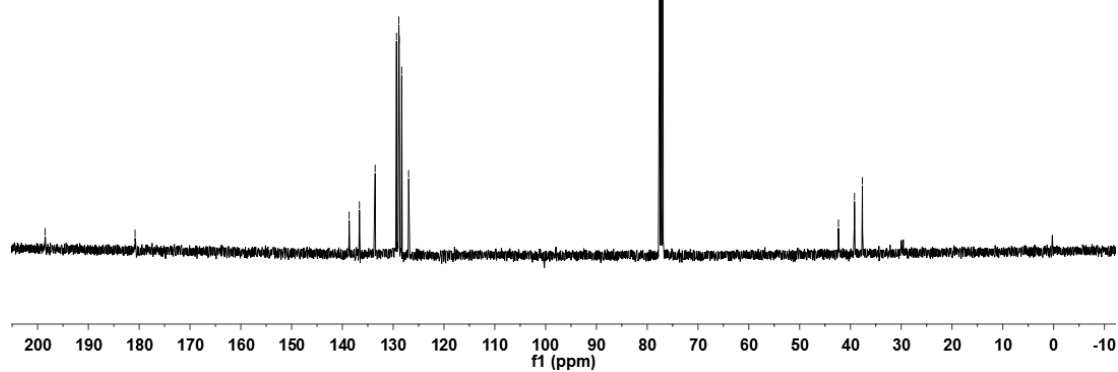



# HPLC spectra

Data File E:\DATA\WB...151107\DAD-OJ1-2-90-10-WB-20151107-2 2015-11-07 11-12-35\080-0801.D  
Sample Name: CCY-6-94-5-RAC

```
=====
Acq. Operator   : SYSTEM                      Seq. Line :    8
Acq. Instrument : 1260HPLC-DAD                Location  : Vial 80
Injection Date  : 11/7/2015 2:31:30 PM         Inj       :    1
                                           Inj Volume: 5.000 µl
Acq. Method     : E:\DATA\WB\WEIB-20151107\DAD-OJ1-2-90-10-WB-20151107-2 2015-11-07 11-12-35
                  \DAD-OJ(1-6)-95-5-1.0ML-ALLNM-45MIN.M
Last changed    : 11/7/2015 12:28:53 PM by SYSTEM
Analysis Method : E:\DATA\WB\WEIB-20151107\DAD-OJ1-2-90-10-WB-20151107-2 2015-11-07 11-12-35
                  \DAD-OJ(1-6)-95-5-1.0ML-ALLNM-45MIN.M (Sequence Method)
Last changed    : 9/5/2016 9:45:28 PM by SYSTEM
                  (modified after loading)
Additional Info : Peak(s) manually integrated
=====
```

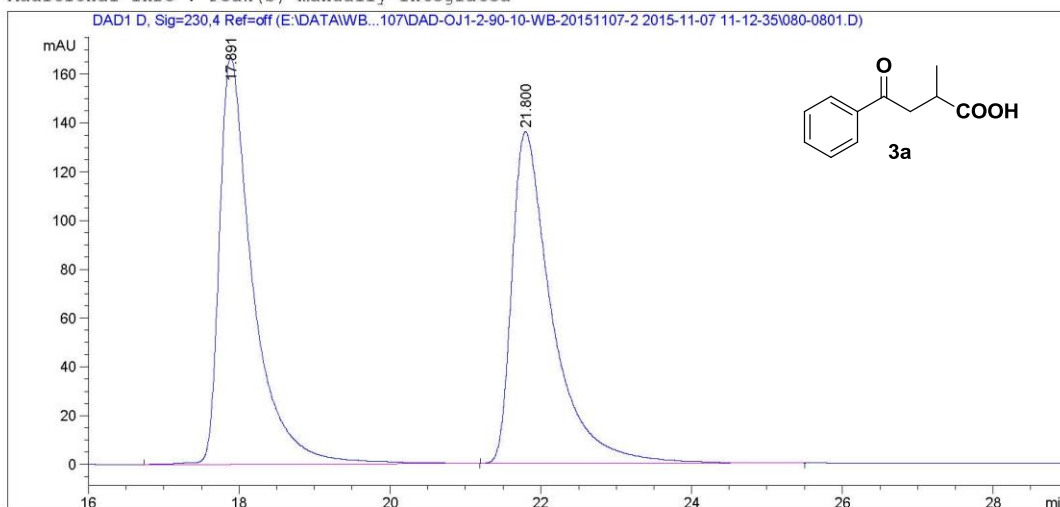

## Area Percent Report

```
=====
Sorted By      :      Signal
Multiplier     :      1.0000
Dilution       :      1.0000
Do not use Multiplier & Dilution Factor with ISTDs
=====
```

Signal 1: DAD1 D, Sig=230,4 Ref=off

| Peak # | RetTime [min] | Type | Width [min] | Area [mAU*s] | Height [mAU] | Area %  |
|--------|---------------|------|-------------|--------------|--------------|---------|
| 1      | 17.891        | BB   | 0.4479      | 5121.19678   | 166.95232    | 50.4726 |
| 2      | 21.800        | BB   | 0.5410      | 5025.28809   | 136.01506    | 49.5274 |

Totals : 1.01465e4 302.96738

\*\*\* End of Report \*\*\*

Data File E:\DATA\HZY\HZY-2-NAI\HZY-2NAI-RAC 2016-03-30 20-31-11\071-1601.D  
Sample Name: wsw-1-75-1

=====

|                 |                        |            |            |
|-----------------|------------------------|------------|------------|
| Acq. Operator   | : SYSTEM               | Seq. Line  | : 16       |
| Acq. Instrument | : 1260HPLC-DAD         | Location   | : Vial 71  |
| Injection Date  | : 3/31/2016 5:56:27 AM | Inj        | : 1        |
|                 |                        | Inj Volume | : 5.000 µl |

Acq. Method : E:\DATA\HZY\HZY-2-NAI\HZY-2NAI-RAC 2016-03-30 20-31-11\DAD-OJ(1-6)-95-5-1.  
OML-ALL-45MIN.M

Last changed : 3/30/2016 10:58:50 PM by SYSTEM

Analysis Method : E:\DATA\HZY\HZY-2-NAI\HZY-2NAI-RAC 2016-03-30 20-31-11\DAD-OJ(1-6)-95-5-1.  
OML-ALL-45MIN.M (Sequence Method)

Last changed : 2/10/2017 8:03:40 PM by SYSTEM  
(modified after loading)

Additional Info : Peak(s) manually integrated

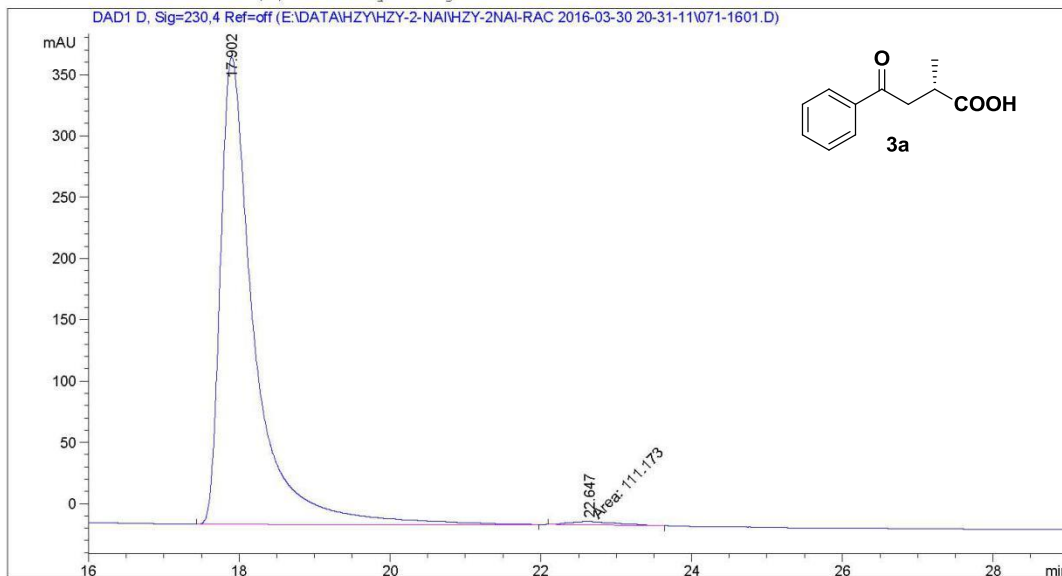

Area Percent Report

Sorted By : Signal  
Multiplier : 1.0000  
Dilution : 1.0000  
Use Multiplier & Dilution Factor with ISTDs

Signal 1: DAD1 D, Sig=230,4 Ref=off

| Peak # | RetTime [min] | Type | Width [min] | Area [mAU*s] | Height [mAU] | Area %  |
|--------|---------------|------|-------------|--------------|--------------|---------|
| 1      | 17.902        | BB   | 0.4515      | 1.18591e4    | 380.66229    | 99.0713 |
| 2      | 22.647        | MM   | 0.7386      | 111.17309    | 2.50857      | 0.9287  |

Totals : 1.19703e4 383.17087

Data File E:\DATA\WSW\WSW-1-33\WSW-1-33A 2015-12-23 15-11-27\071-0101.D  
Sample Name: WSW-1-33-1

```
=====
Acq. Operator   : SYSTEM                      Seq. Line :    1
Acq. Instrument : 1260HPLC-DAD                Location  : Vial 71
Injection Date  : 12/23/2015 3:12:19 PM        Inj       :    1
                                           Inj Volume: 5.000 µl
Acq. Method     : E:\DATA\WSW\WSW-1-33\WSW-1-33A 2015-12-23 15-11-27\
DAD-OJ(1-6)-95-5-1.0ML-ALL-45MIN.M
Last changed    : 12/23/2015 3:11:27 PM by SYSTEM
Analysis Method : E:\DATA\WSW\WSW-1-33\WSW-1-33A 2015-12-23 15-11-27\
DAD-OJ(1-6)-95-5-1.0ML-ALL-45MIN.M (Sequence Method)
Last changed    : 9/3/2016 7:27:20 PM by SYSTEM
                  (modified after loading)
Additional Info  : Peak(s) manually integrated
=====
```

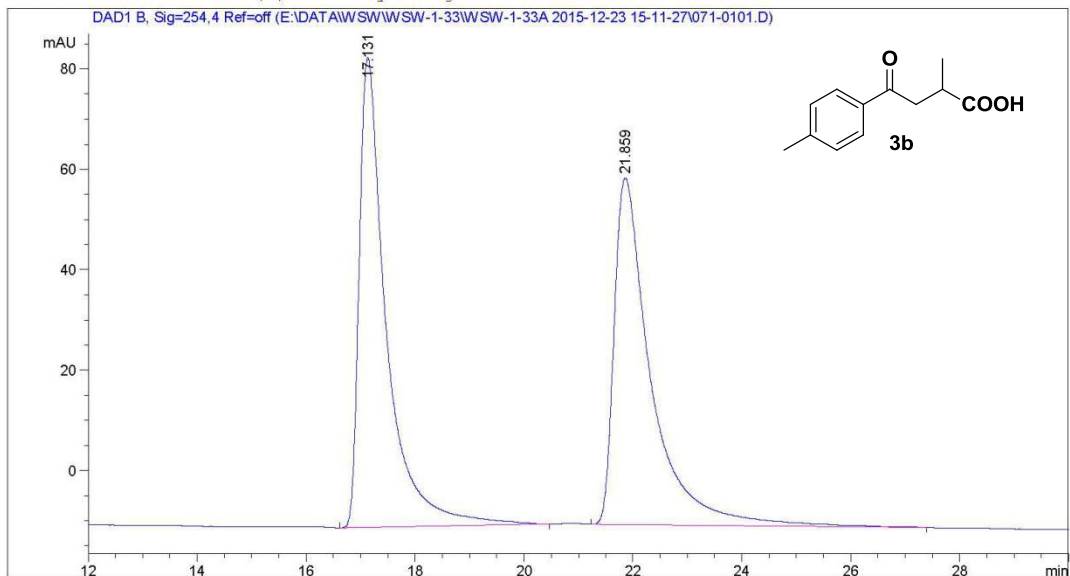

Area Percent Report

```
=====
Sorted By      :      Signal
Multiplier     :      1.0000
Dilution       :      1.0000
Use Multiplier & Dilution Factor with ISTDs
=====
```

Signal 1: DAD1 B, Sig=254,4 Ref=off

| Peak # | RetTime [min] | Type | Width [min] | Area [mAU*s] | Height [mAU] | Area %  |
|--------|---------------|------|-------------|--------------|--------------|---------|
| 1      | 17.131        | BB   | 0.4999      | 3239.95850   | 93.59347     | 49.9162 |
| 2      | 21.859        | BB   | 0.6791      | 3250.84058   | 69.07588     | 50.0838 |

Totals : 6490.79907 162.66935

Data File E:\DATA\HZY\HZY-2-NAI\HZY-2NAI-RAC 2016-03-30 20-31-11\072-1701.D  
Sample Name: wsw-1-75-2

```
=====
Acq. Operator   : SYSTEM                      Seq. Line :   17
Acq. Instrument : 1260HPLC-DAD                Location  : Vial 72
Injection Date  : 3/31/2016 6:42:27 AM         Inj       :    1
                                           Inj Volume: 5.000 µl

Acq. Method     : E:\DATA\HZY\HZY-2-NAI\HZY-2NAI-RAC 2016-03-30 20-31-11\DAD-OJ(1-6)-95-5-1.
                  OML-ALL-45MIN.M
Last changed    : 3/30/2016 10:58:50 PM by SYSTEM
Analysis Method : E:\DATA\HZY\HZY-2-NAI\HZY-2NAI-RAC 2016-03-30 20-31-11\DAD-OJ(1-6)-95-5-1.
                  OML-ALL-45MIN.M (Sequence Method)
Last changed    : 2/10/2017 8:52:56 PM by SYSTEM
                  (modified after loading)
Additional Info : Peak(s) manually integrated
=====
```

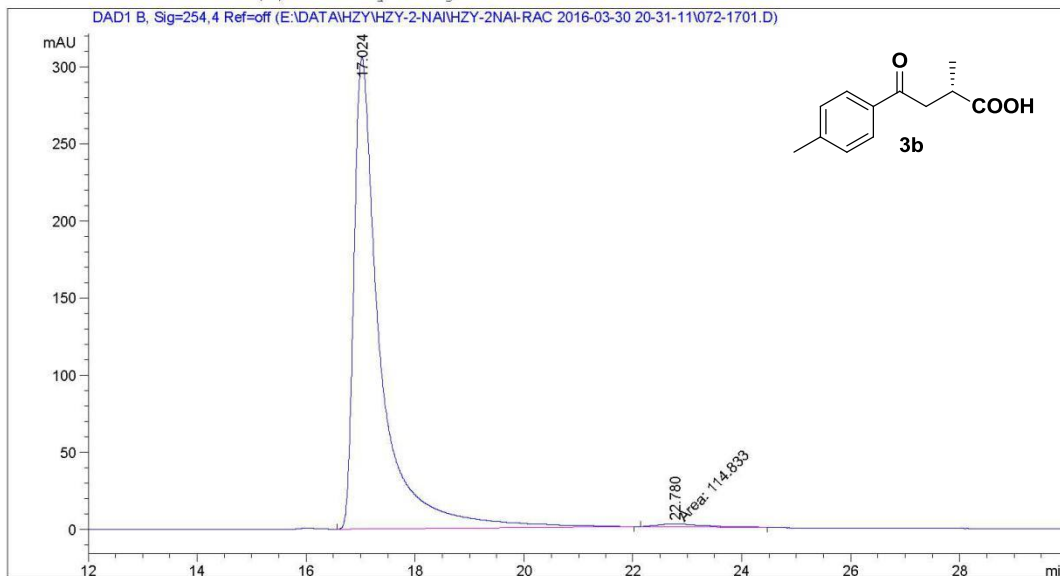

# Area Percent Report

```
Sorted By      : Signal
Multiplier     : 1.0000
Dilution       : 1.0000
Use Multiplier & Dilution Factor with ISTDs
```

Signal 1: DAD1 B, Sig=254,4 Ref=off

| Peak # | RetTime [min] | Type | Width [min] | Area [mAU*s] | Height [mAU] | Area %  |
|--------|---------------|------|-------------|--------------|--------------|---------|
| 1      | 17.024        | BB   | 0.4770      | 1.01971e4    | 305.81003    | 98.8864 |
| 2      | 22.780        | MM   | 1.0717      | 114.83280    | 1.78584      | 1.1136  |

Totals : 1.03119e4 307.59587

Sample Name: WSW-1-73-4

```

=====
Acq. Operator   : SYSTEM                      Seq. Line :    4
Acq. Instrument : 1260HPLC-DAD                Location  : Vial 74
Injection Date  : 3/30/2016 9:14:59 AM        Inj       :    1
                                           Inj Volume: 5.000 µl

Acq. Method     : E:\DATA\WSW\WSW-1-73A\WSW 2016-03-30 06-20-57\DAD-OJ(1-6)-95-5-1.0ML-ALL-
                  45MIN.M
Last changed    : 3/30/2016 6:42:23 AM by SYSTEM
Analysis Method : E:\DATA\WSW\WSW-1-73A\WSW 2016-03-30 06-20-57\DAD-OJ(1-6)-95-5-1.0ML-ALL-
                  45MIN.M (Sequence Method)
Last changed    : 9/5/2016 9:33:18 PM by SYSTEM
                  (modified after loading)
Additional Info  : Peak(s) manually integrated
  
```

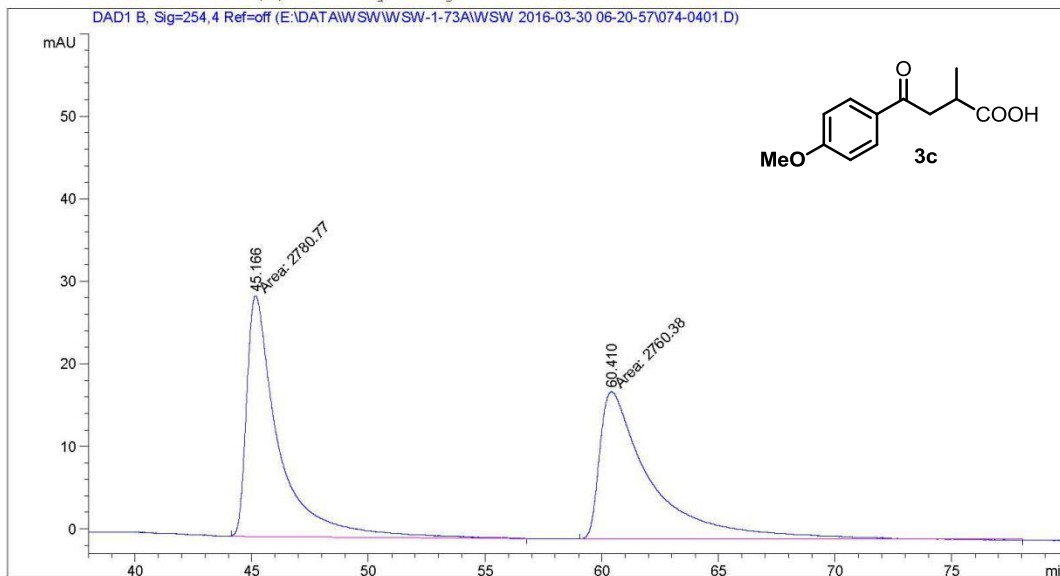

=====  
 Area Percent Report  
 =====

```

Sorted By      :      Signal
Multiplier     :      1.0000
Dilution       :      1.0000
Use Multiplier & Dilution Factor with ISTDs
  
```

Signal 1: DAD1 B, Sig=254,4 Ref=off

| Peak # | RetTime [min] | Type | Width [min] | Area [mAU*s] | Height [mAU] | Area %  |
|--------|---------------|------|-------------|--------------|--------------|---------|
| 1      | 45.166        | MM   | 1.5877      | 2780.76855   | 29.18990     | 50.1840 |
| 2      | 60.410        | MM   | 2.5733      | 2760.37842   | 17.87862     | 49.8160 |

Totals :                      5541.14697    47.06852

Data File E:\DATA\HZY\HZY-2-NAI\HZY-2NAI-RAC 2016-03-30 20-31-11\073-1801.D  
Sample Name: wsw-1-75-3

```
=====
Acq. Operator   : SYSTEM                      Seq. Line :   18
Acq. Instrument : 1260HPLC-DAD                Location  : Vial 73
Injection Date  : 3/31/2016 7:28:29 AM         Inj       :    1
                                           Inj Volume: 1.000 µl
Acq. Method     : E:\DATA\HZY\HZY-2-NAI\HZY-2NAI-RAC 2016-03-30 20-31-11\
  -ALL-90MIN.M
Last changed    : 3/30/2016 11:07:04 PM by SYSTEM
Analysis Method : E:\DATA\HZY\HZY-2-NAI\HZY-2NAI-RAC 2016-03-30 20-31-11\
  -ALL-90MIN.M (Sequence Method)
Last changed    : 9/5/2016 9:31:12 PM by SYSTEM
  (modified after loading)
Additional Info  : Peak(s) manually integrated
=====
```

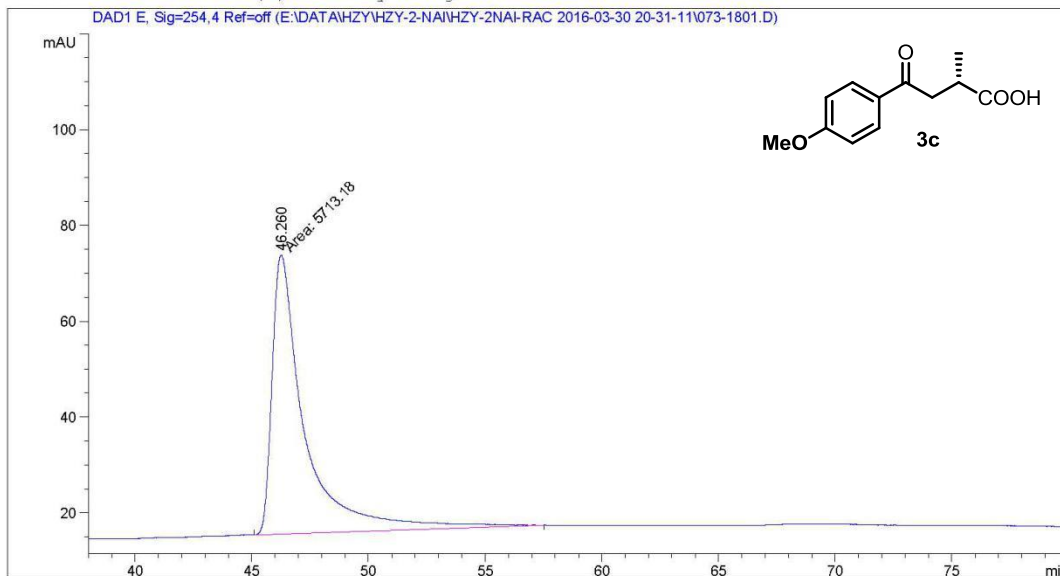

Area Percent Report

```
=====
Sorted By      :      Signal
Multiplier     :      1.0000
Dilution       :      1.0000
Use Multiplier & Dilution Factor with ISTDs
=====
```

Signal 1: DAD1 E, Sig=254,4 Ref=off

| Peak #   | RetTime [min] | Type | Width [min] | Area [mAU*s] | Height [mAU] | Area %   |
|----------|---------------|------|-------------|--------------|--------------|----------|
| 1        | 46.260        | MM   | 1.6337      | 5713.18262   | 58.28351     | 100.0000 |
| Totals : |               |      |             | 5713.18262   | 58.28351     |          |

Data File E:\DATA\GWC\GWC-16-1\DU1 CL 2015-12-31 18-32-05\047-1201.D  
Sample Name: wsw-1-38-5

```
=====
Acq. Operator   : SYSTEM                      Seq. Line :   12
Acq. Instrument : 1260HPLC-DAD                Location  : Vial 47
Injection Date  : 1/1/2016 12:28:37 AM         Inj       :    1
                                           Inj Volume: 5.000 µl
Acq. Method     : E:\DATA\GWC\GWC-16-1\DU1 CL 2015-12-31 18-32-05\DAD-OJ(1-6)-95-5-1.OML-ALL-
                  45MIN.M
Last changed    : 12/31/2015 7:06:20 PM by SYSTEM
Analysis Method : E:\DATA\GWC\GWC-16-1\DU1 CL 2015-12-31 18-32-05\DAD-OJ(1-6)-95-5-1.OML-ALL-
                  45MIN.M (Sequence Method)
Last changed    : 9/4/2016 5:08:38 PM by SYSTEM
                  (modified after loading)
Additional Info  : Peak(s) manually integrated
=====
```

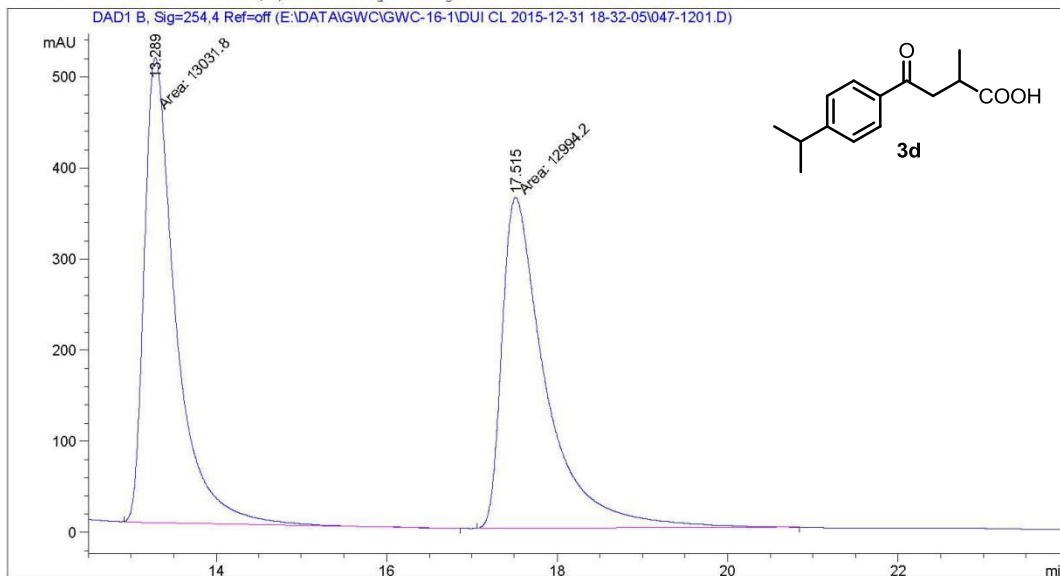

Area Percent Report

```
=====
Sorted By      :      Signal
Multiplier     :      1.0000
Dilution       :      1.0000
Use Multiplier & Dilution Factor with ISTDs
=====
```

Signal 1: DAD1 B, Sig=254,4 Ref=off

| Peak # | RetTime [min] | Type | Width [min] | Area [mAU*s] | Height [mAU] | Area %  |
|--------|---------------|------|-------------|--------------|--------------|---------|
| 1      | 13.289        | MM   | 0.4254      | 1.30318e4    | 510.57037    | 50.0723 |
| 2      | 17.515        | MM   | 0.5967      | 1.29942e4    | 362.93323    | 49.9277 |

Totals : 2.60260e4 873.50360



Data File E:\DATA\WSW\WSW-1-72\S-YUANLIAO 2016-03-28 11-55-43\085-0601.D  
Sample Name: WSW-1-72-1-1

```
=====
Acq. Operator   : SYSTEM                      Seq. Line :    6
Acq. Instrument : 1260HPLC-DAD                Location  : Vial 85
Injection Date  : 3/28/2016 3:26:32 PM        Inj       :    1
                                           Inj Volume: 5.000 µl

Acq. Method     : E:\DATA\WSW\WSW-1-72\S-YUANLIAO 2016-03-28 11-55-43\
DAD-OJ(1-6)-95-5-1.0ML-ALL-45MIN.M
Last changed    : 3/28/2016 4:01:19 PM by SYSTEM
                  (modified after loading)
Analysis Method : E:\DATA\WSW\WSW-1-72\S-YUANLIAO 2016-03-28 11-55-43\
DAD-OJ(1-6)-95-5-1.0ML-ALL-45MIN.M (Sequence Method)
Last changed    : 9/5/2016 9:25:34 AM by SYSTEM
                  (modified after loading)
Additional Info  : Peak(s) manually integrated
=====
```

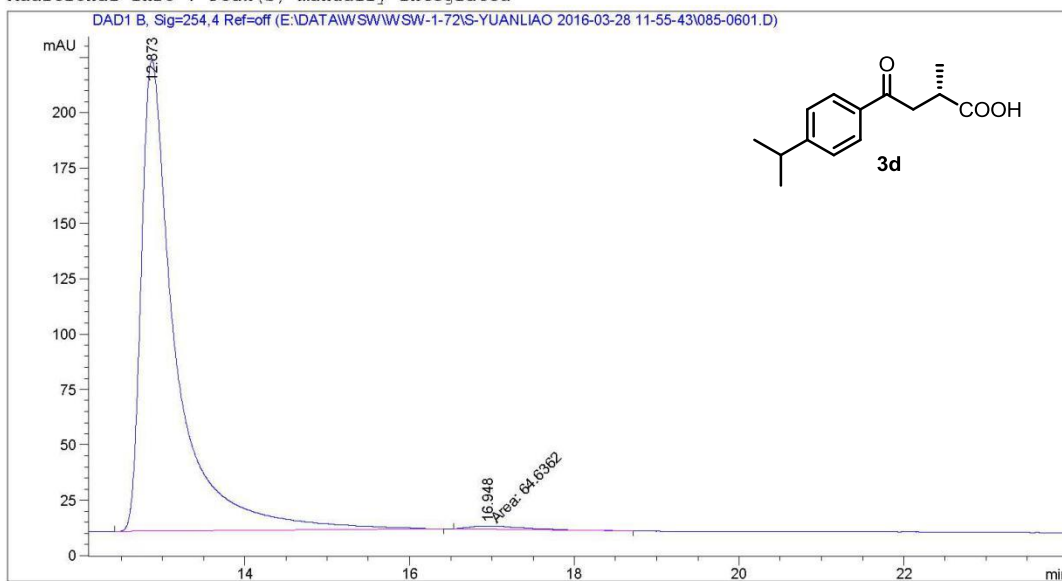

Area Percent Report

```
=====
Sorted By      :      Signal
Multiplier     :      1.0000
Dilution       :      1.0000
Use Multiplier & Dilution Factor with ISTDs
=====
```

Signal 1: DAD1 B, Sig=254,4 Ref=off

| Peak # | RetTime [min] | Type | Width [min] | Area [mAU*s] | Height [mAU] | Area %  |
|--------|---------------|------|-------------|--------------|--------------|---------|
| 1      | 12.873        | BB   | 0.4150      | 6215.80518   | 212.66885    | 98.9708 |
| 2      | 16.948        | MM   | 0.7306      | 64.63621     | 1.47440      | 1.0292  |

Totals : 6280.44138 214.14326



Data File E:\DATA\GWC\GWC-16-1\DU1 CL 2015-12-31 18-32-05\043-0501.D  
Sample Name: wsw-1-38-2

```
=====
Acq. Operator   : SYSTEM                      Seq. Line :    5
Acq. Instrument : 1260HPLC-DAD                Location  : Vial 43
Injection Date  : 12/31/2015 8:36:50 PM        Inj       :    1
                                           Inj Volume: 5.000 µl
Acq. Method     : E:\DATA\GWC\GWC-16-1\DU1 CL 2015-12-31 18-32-05\DAD-OJ(1-6)-95-5-1.OML-ALL-45MIN.M
Last changed    : 12/31/2015 7:06:20 PM by SYSTEM
Analysis Method : E:\DATA\GWC\GWC-16-1\DU1 CL 2015-12-31 18-32-05\DAD-OJ(1-6)-95-5-1.OML-ALL-45MIN.M (Sequence Method)
Last changed    : 9/5/2016 10:09:47 AM by SYSTEM
                  (modified after loading)
Additional Info  : Peak(s) manually integrated
=====
```

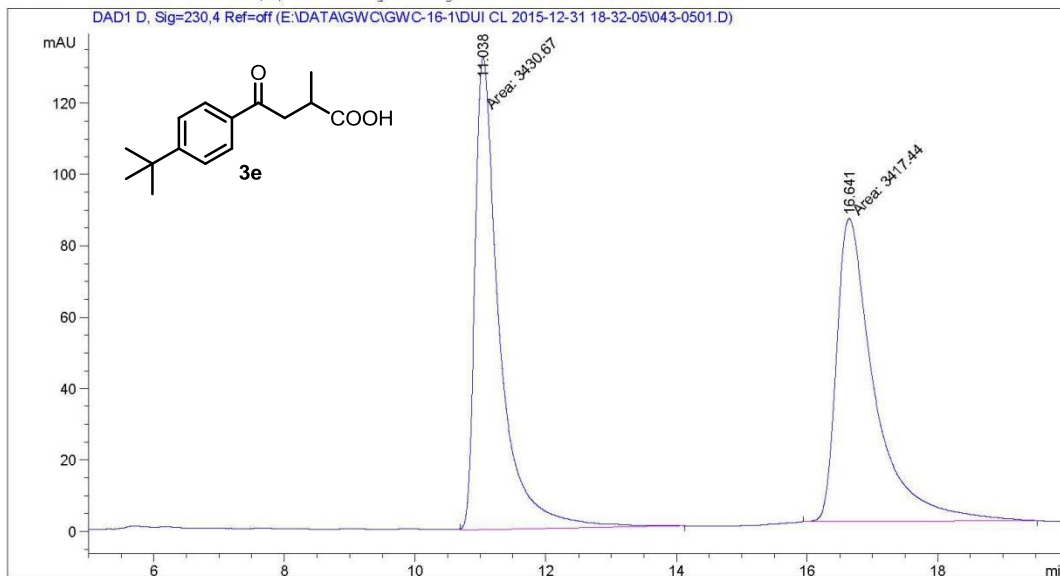

# Area Percent Report

```
Sorted By      : Signal
Multiplier     : 1.0000
Dilution       : 1.0000
Use Multiplier & Dilution Factor with ISTDs
```

Signal 1: DAD1 D, Sig=230,4 Ref=off

| Peak # | RetTime [min] | Type | Width [min] | Area [mAU*s] | Height [mAU] | Area %  |
|--------|---------------|------|-------------|--------------|--------------|---------|
| 1      | 11.038        | MM   | 0.4322      | 3430.66821   | 132.30887    | 50.0966 |
| 2      | 16.641        | MM   | 0.6717      | 3417.44312   | 84.79080     | 49.9034 |

Totals : 6848.11133 217.09967

Data File E:\DATA\WSW\WSW-1-68\DAD-OD-97-3-WFY-2-72 2016-03-24 23-07-54\068-0901.D  
Sample Name: wsw-1-68-8

```
=====
Acq. Operator   : SYSTEM                      Seq. Line :    9
Acq. Instrument : 1260HPLC-DAD                Location  : Vial 68
Injection Date  : 3/25/2016 4:43:22 AM        Inj       :    1
                                           Inj Volume: 5.000 µl

Acq. Method     : E:\DATA\WSW\WSW-1-68\DAD-OD-97-3-WFY-2-72 2016-03-24 23-07-54\DAD-OJ(1-6)-
                  95-5-1.OML-ALL-45MIN.M
Last changed    : 3/24/2016 11:07:54 PM by SYSTEM
Analysis Method : E:\DATA\WSW\WSW-1-68\DAD-OD-97-3-WFY-2-72 2016-03-24 23-07-54\DAD-OJ(1-6)-
                  95-5-1.OML-ALL-45MIN.M (Sequence Method)
Last changed    : 9/5/2016 9:35:03 AM by SYSTEM
                  (modified after loading)
Additional Info  : Peak(s) manually integrated
=====
```

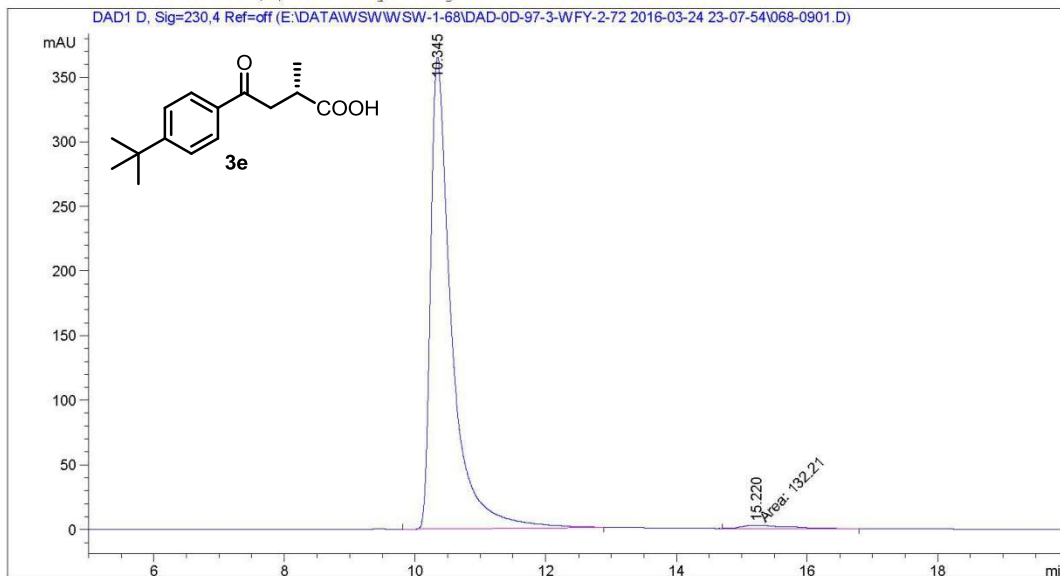

# Area Percent Report

```
=====
Sorted By      :      Signal
Multiplier     :      1.0000
Dilution       :      1.0000
Use Multiplier & Dilution Factor with ISTDs
=====
```

Signal 1: DAD1 D, Sig=230,4 Ref=off

| Peak # | RetTime [min] | Type | Width [min] | Area [mAU*s] | Height [mAU] | Area %  |
|--------|---------------|------|-------------|--------------|--------------|---------|
| 1      | 10.345        | BB   | 0.3224      | 8082.22900   | 364.90659    | 98.3905 |
| 2      | 15.220        | MM   | 0.8103      | 132.21048    | 2.71943      | 1.6095  |

Totals : 8214.43948 367.62602

Data File E:\DATA\WSW\WSW-1-40\WSW 2016-01-02 21-17-06\011-0201.D  
Sample Name: wsw-1-40-1

```
=====
Acq. Operator   : SYSTEM                      Seq. Line :    2
Acq. Instrument : 1260HPLC-DAD                Location  : Vial 11
Injection Date  : 1/2/2016 9:29:43 PM          Inj       :    1
                                           Inj Volume: 5.000 µl
Acq. Method     : E:\DATA\WSW\WSW-1-40\WSW 2016-01-02 21-17-06\DAD-OJ(1-6)-95-5-1.0ML-ALL-
                  45MIN.M
Last changed    : 1/2/2016 9:17:06 PM by SYSTEM
Analysis Method : E:\DATA\WSW\WSW-1-40\WSW 2016-01-02 21-17-06\DAD-OJ(1-6)-95-5-1.0ML-ALL-
                  45MIN.M (Sequence Method)
Last changed    : 9/3/2016 7:14:43 PM by SYSTEM
                  (modified after loading)
Additional Info  : Peak(s) manually integrated
=====
```

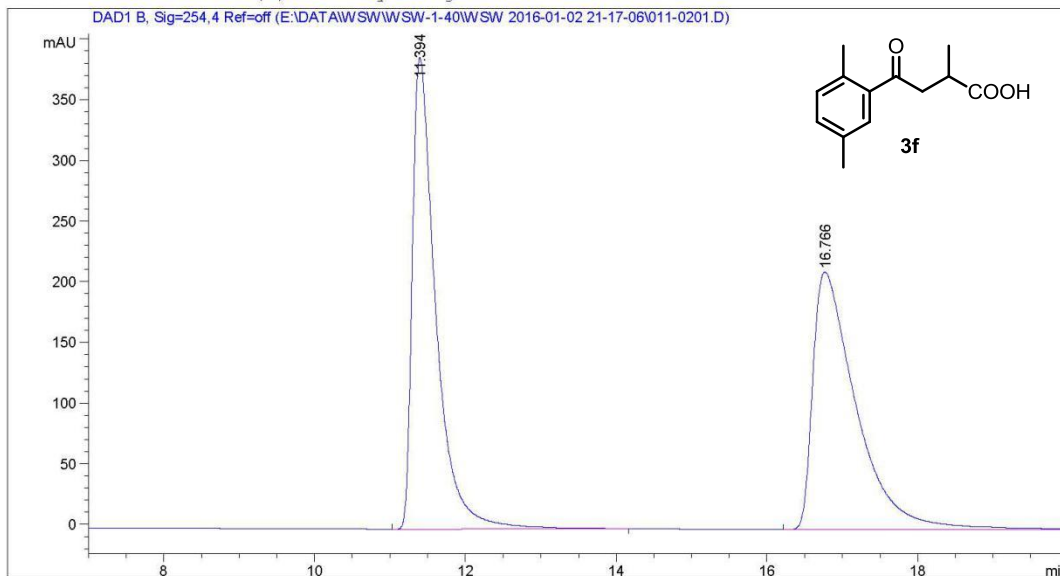

Area Percent Report

```
=====
Sorted By      : Signal
Multiplier     : 1.0000
Dilution       : 1.0000
Use Multiplier & Dilution Factor with ISTDs
=====
```

Signal 1: DAD1 B, Sig=254,4 Ref=off

| Peak # | RetTime [min] | Type | Width [min] | Area [mAU*s] | Height [mAU] | Area %  |
|--------|---------------|------|-------------|--------------|--------------|---------|
| 1      | 11.394        | BB   | 0.3196      | 8385.75000   | 388.85330    | 49.6792 |
| 2      | 16.766        | BB   | 0.5895      | 8494.04297   | 211.98248    | 50.3208 |

Totals : 1.68798e4 600.83578

Data File E:\DATA\WSW\WSW-1-75\YHL-5-2NAI-CHIRAL 2016-04-02 13-12-09\071-0201.D  
Sample Name: WSW-1-75-4

```
=====
Acq. Operator   : SYSTEM                      Seq. Line :    2
Acq. Instrument : 1260HPLC-DAD                Location  : Vial 71
Injection Date  : 4/2/2016 1:29:04 PM          Inj       :    1
                                           Inj Volume: 5.000 µl

Acq. Method     : E:\DATA\WSW\WSW-1-75\YHL-5-2NAI-CHIRAL 2016-04-02 13-12-09\DAD-OJ(1-6)-95-5
                  -1.OML-ALL-45MIN.M
Last changed    : 4/2/2016 2:07:23 PM by SYSTEM
                  (modified after loading)
Analysis Method : E:\DATA\WSW\WSW-1-75\YHL-5-2NAI-CHIRAL 2016-04-02 13-12-09\DAD-OJ(1-6)-95-5
                  -1.OML-ALL-45MIN.M (Sequence Method)
Last changed    : 2/10/2017 8:57:02 PM by SYSTEM
                  (modified after loading)
Additional Info : Peak(s) manually integrated
=====
```

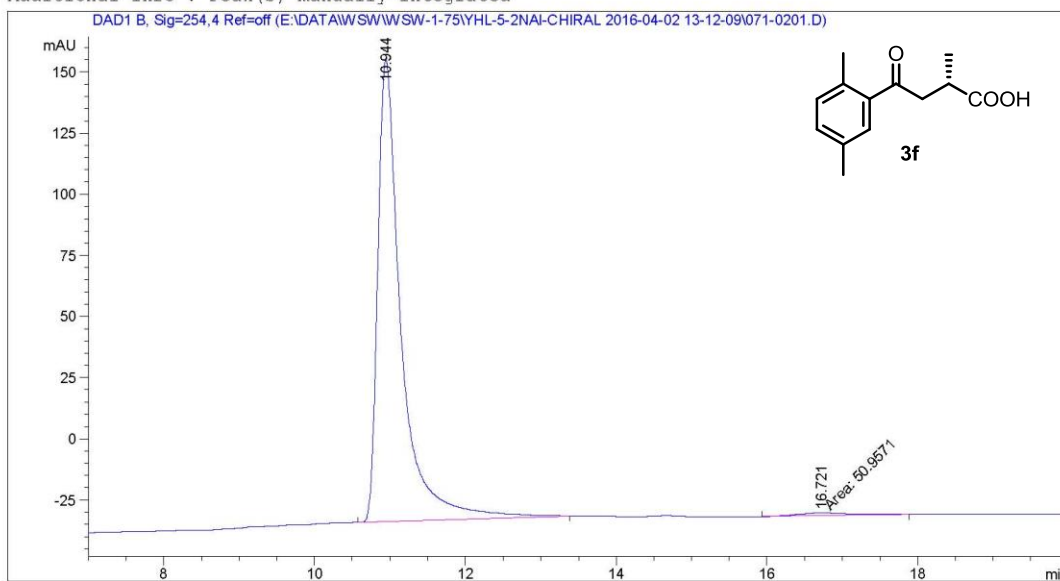

Area Percent Report

```
=====
Sorted By      :      Signal
Multiplier     :      1.0000
Dilution       :      1.0000
Use Multiplier & Dilution Factor with ISTDs
=====
```

Signal 1: DAD1 B, Sig=254,4 Ref=off

| Peak # | RetTime [min] | Type | Width [min] | Area [mAU*s] | Height [mAU] | Area %  |
|--------|---------------|------|-------------|--------------|--------------|---------|
| 1      | 10.944        | BB   | 0.3162      | 4077.70337   | 188.63388    | 98.7658 |
| 2      | 16.721        | MM   | 0.8238      | 50.95708     | 1.03097      | 1.2342  |

Totals : 4128.66045 189.66485

Data File E:\DATA\WSW\WSW-1-40\WSW 2016-01-02 21-17-06\012-1001.D  
Sample Name: wsw-1-40-2

```
=====
Acq. Operator   : SYSTEM                      Seq. Line :   10
Acq. Instrument : 1260HPLC-DAD                Location  : Vial 12
Injection Date  : 1/2/2016 11:37:28 PM        Inj       :    1
                                           Inj Volume: 5.000 µl

Acq. Method     : E:\DATA\WSW\WSW-1-40\WSW 2016-01-02 21-17-06\DAD-OJ(1-6)-95-5-1.0ML-ALL-45MIN.M
Last changed    : 1/2/2016 9:17:06 PM by SYSTEM
Analysis Method : E:\DATA\WSW\WSW-1-40\WSW 2016-01-02 21-17-06\DAD-OJ(1-6)-95-5-1.0ML-ALL-45MIN.M (Sequence Method)
Last changed    : 9/3/2016 8:01:05 PM by SYSTEM
                  (modified after loading)
Additional Info  : Peak(s) manually integrated
=====
```

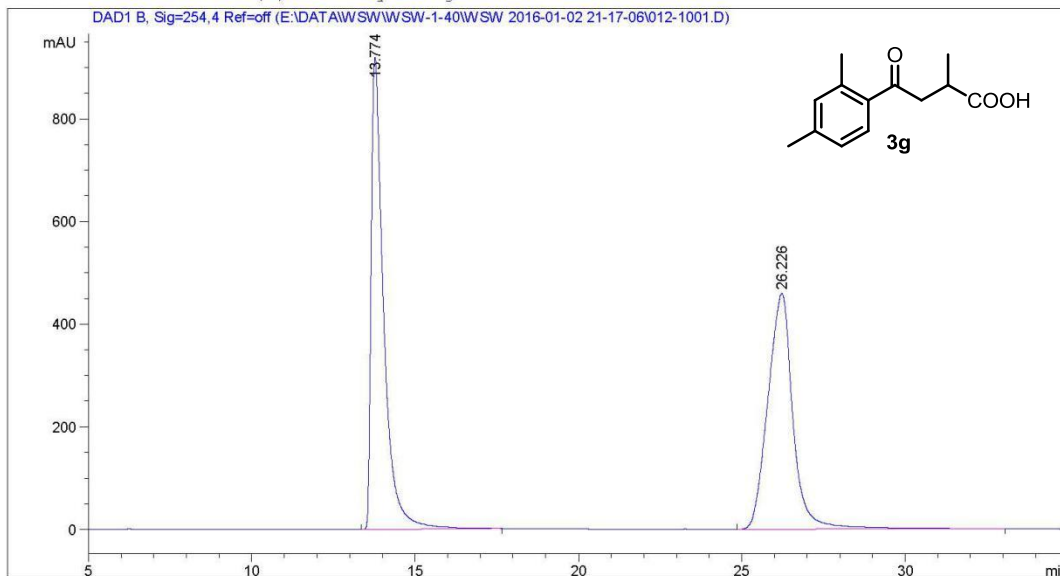

# Area Percent Report

```
=====
Sorted By      :      Signal
Multiplier     :      1.0000
Dilution       :      1.0000
Use Multiplier & Dilution Factor with ISTDs
=====
```

Signal 1: DAD1 B, Sig=254,4 Ref=off

| Peak # | RetTime [min] | Type | Width [min] | Area [mAU*s] | Height [mAU] | Area %  |
|--------|---------------|------|-------------|--------------|--------------|---------|
| 1      | 13.774        | BB   | 0.3882      | 2.42904e4    | 919.49597    | 49.7527 |
| 2      | 26.226        | BB   | 0.8077      | 2.45319e4    | 458.88672    | 50.2473 |

Totals : 4.88224e4 1378.38269

Data File E:\DATA\HZY\HZY-2-NAI\HZY-2NAI-RAC 2016-03-30 20-31-11\075-2001.D  
Sample Name: wsw-1-75-5

```
=====
Acq. Operator   : SYSTEM                      Seq. Line :   20
Acq. Instrument : 1260HPLC-DAD                Location  : Vial 75
Injection Date  : 3/31/2016 9:45:35 AM         Inj       :    1
                                           Inj Volume: 5.000 µl

Acq. Method     : E:\DATA\HZY\HZY-2-NAI\HZY-2NAI-RAC 2016-03-30 20-31-11\DAD-OJ(1-6)-95-5-1.
                  OML-ALL-45MIN.M
Last changed    : 3/30/2016 10:58:50 PM by SYSTEM
Analysis Method : E:\DATA\HZY\HZY-2-NAI\HZY-2NAI-RAC 2016-03-30 20-31-11\DAD-OJ(1-6)-95-5-1.
                  OML-ALL-45MIN.M (Sequence Method)
Last changed    : 9/3/2016 8:02:21 PM by SYSTEM
                  (modified after loading)
Additional Info  : Peak(s) manually integrated
=====
```

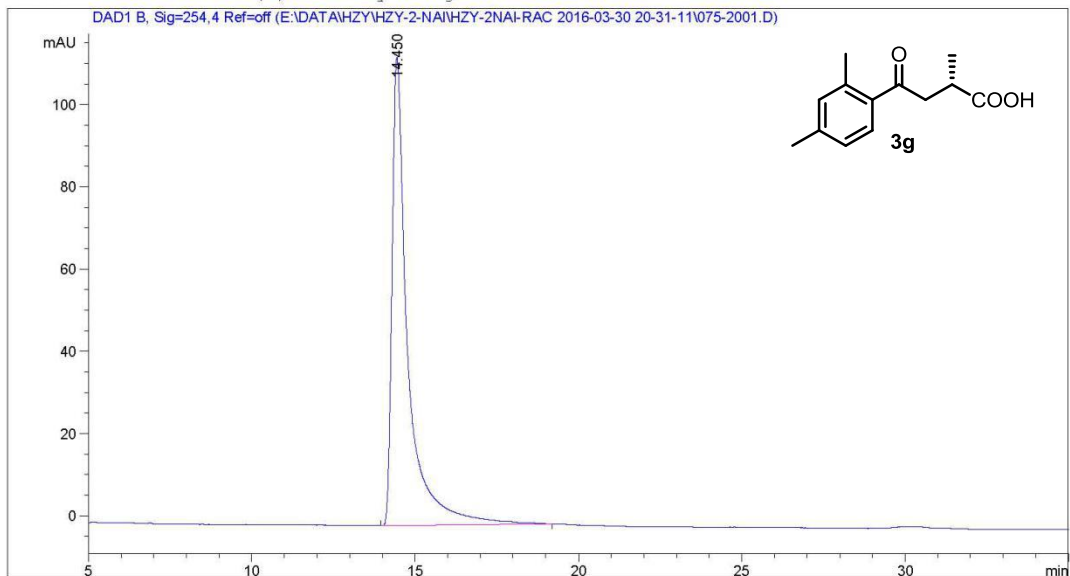

Area Percent Report

```
=====
Sorted By      : Signal
Multiplier     : 1.0000
Dilution       : 1.0000
Use Multiplier & Dilution Factor with ISTDs
=====
```

Signal 1: DAD1 B, Sig=254,4 Ref=off

| Peak # | RetTime [min] | Type | Width [min] | Area [mAU*s] | Height [mAU] | Area %   |
|--------|---------------|------|-------------|--------------|--------------|----------|
| 1      | 14.450        | BB   | 0.4801      | 3828.53345   | 113.91030    | 100.0000 |

Totals : 3828.53345 113.91030

Data File E:\DATA\WSW\WSW-1-40\WSW 2016-01-02 21-17-06\013-1101.D  
Sample Name: wsw-1-40-3

```
=====
Acq. Operator   : SYSTEM                      Seq. Line :   11
Acq. Instrument : 1260HPLC-DAD                Location  : Vial 13
Injection Date  : 1/3/2016 12:23:23 AM         Inj       :    1
                                           Inj Volume: 5.000 µl

Acq. Method     : E:\DATA\WSW\WSW-1-40\WSW 2016-01-02 21-17-06\DAD-OJ(1-6)-95-5-1.0ML-ALL-45MIN.M
Last changed    : 1/2/2016 9:17:06 PM by SYSTEM
Analysis Method : E:\DATA\WSW\WSW-1-40\WSW 2016-01-02 21-17-06\DAD-OJ(1-6)-95-5-1.0ML-ALL-45MIN.M (Sequence Method)
Last changed    : 9/4/2016 4:16:17 PM by SYSTEM
                  (modified after loading)
Additional Info  : Peak(s) manually integrated
=====
```

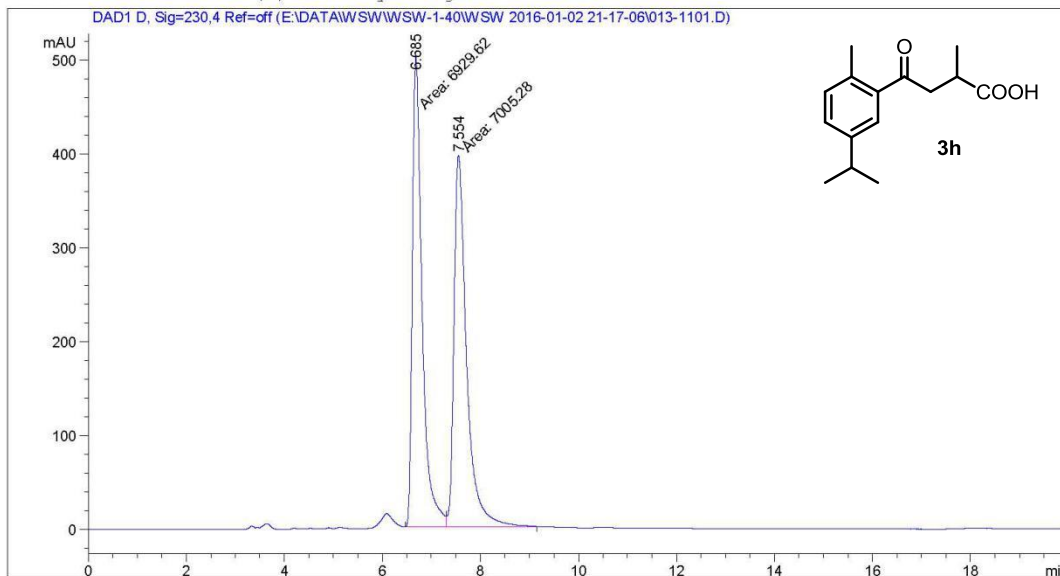

# Area Percent Report

```
=====
Sorted By      :      Signal
Multiplier     :      1.0000
Dilution       :      1.0000
Use Multiplier & Dilution Factor with ISTDs
=====
```

Signal 1: DAD1 D, Sig=230,4 Ref=off

| Peak # | RetTime [min] | Type | Width [min] | Area [mAU*s] | Height [mAU] | Area %  |
|--------|---------------|------|-------------|--------------|--------------|---------|
| 1      | 6.685         | MF   | 0.2310      | 6929.62451   | 499.92773    | 49.7285 |
| 2      | 7.554         | FM   | 0.2955      | 7005.27734   | 395.04926    | 50.2715 |

Totals : 1.39349e4 894.97699



Data File E:\DATA\HZY\HZY-2-NAI\HZY-2NAI-RAC 2016-03-30 20-31-11\076-2301.D  
Sample Name: wsw-1-75-6

```

=====
Acq. Operator   : SYSTEM                      Seq. Line :   23
Acq. Instrument : 1260HPLC-DAD                Location  : Vial 76
Injection Date  : 3/31/2016 1:34:00 PM         Inj       :    1
                                           Inj Volume: 5.000 µl

Acq. Method     : E:\DATA\HZY\HZY-2-NAI\HZY-2NAI-RAC 2016-03-30 20-31-11\
DAD-OJ(1-6)-95-5-1.
                        OML-ALL-45MIN.M
Last changed    : 3/31/2016 1:46:38 PM by SYSTEM
                        (modified after loading)
Analysis Method : E:\DATA\HZY\HZY-2-NAI\HZY-2NAI-RAC 2016-03-30 20-31-11\
DAD-OJ(1-6)-95-5-1.
                        OML-ALL-45MIN.M (Sequence Method)
Last changed    : 9/4/2016 4:08:40 PM by SYSTEM
                        (modified after loading)
Additional Info  : Peak(s) manually integrated
=====

```

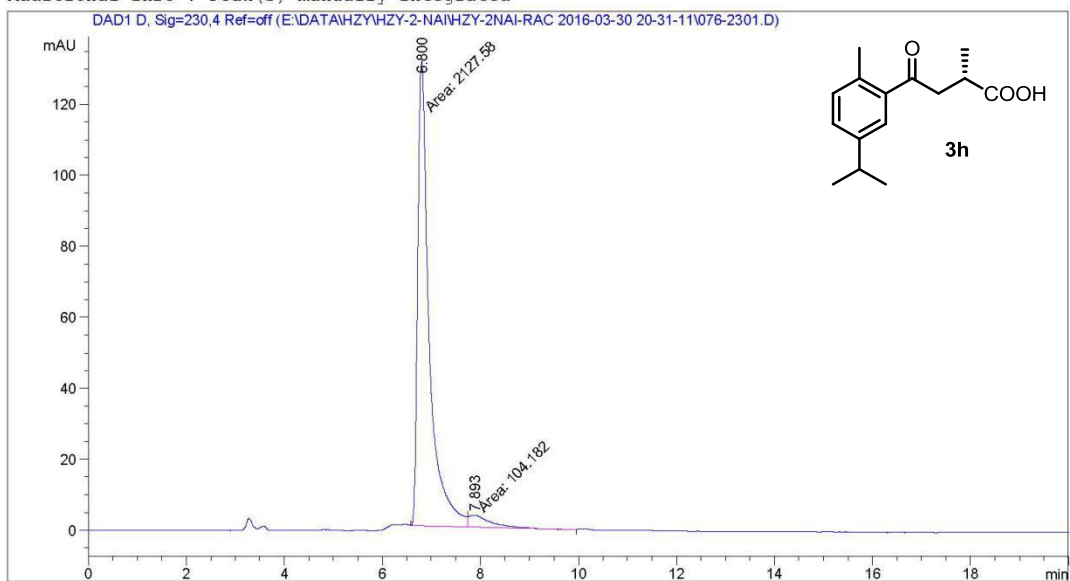

#### Area Percent Report

```

=====
Sorted By      :      Signal
Multiplier     :      1.0000
Dilution       :      1.0000
Use Multiplier & Dilution Factor with ISTDs
=====

```

Signal 1: DAD1 D, Sig=230,4 Ref=off

| Peak # | RetTime [min] | Type | Width [min] | Area [mAU*s] | Height [mAU] | Area %  |
|--------|---------------|------|-------------|--------------|--------------|---------|
| 1      | 6.800         | MF   | 0.2703      | 2127.58252   | 131.17767    | 95.3318 |
| 2      | 7.893         | FM   | 0.5215      | 104.18213    | 3.32926      | 4.6682  |

Totals : 2231.76465 134.50693



Data File E:\DATA\WSW\WSW-1-33\WSW-1-33A 2015-12-23 15-11-27\075-0501.D  
Sample Name: WSW-1-33-5

```
=====
Acq. Operator   : SYSTEM                      Seq. Line :    5
Acq. Instrument : 1260HPLC-DAD                Location  : Vial 75
Injection Date  : 12/23/2015 6:16:07 PM        Inj       :    1
                                           Inj Volume: 5.000 µl
Acq. Method     : E:\DATA\WSW\WSW-1-33\WSW-1-33A 2015-12-23 15-11-27\
DAD-OJ(1-6)-95-5-1.0ML-ALL-45MIN.M
Last changed    : 12/23/2015 3:11:27 PM by SYSTEM
Analysis Method : E:\DATA\WSW\WSW-1-33\WSW-1-33A 2015-12-23 15-11-27\
DAD-OJ(1-6)-95-5-1.0ML-ALL-45MIN.M (Sequence Method)
Last changed    : 9/5/2016 10:20:38 AM by SYSTEM
                  (modified after loading)
Additional Info : Peak(s) manually integrated
=====
```

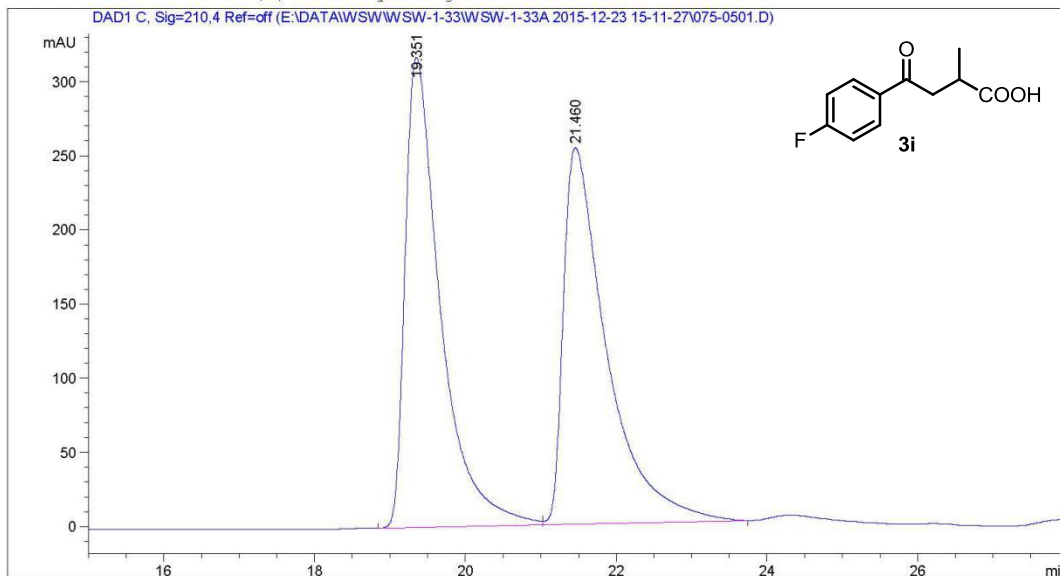

Area Percent Report

```
=====
Sorted By      :      Signal
Multiplier     :      1.0000
Dilution       :      1.0000
Use Multiplier & Dilution Factor with ISTDs
=====
```

Signal 1: DAD1 C, Sig=210,4 Ref=off

| Peak # | RetTime [min] | Type | Width [min] | Area [mAU*s] | Height [mAU] | Area %  |
|--------|---------------|------|-------------|--------------|--------------|---------|
| 1      | 19.351        | BV   | 0.4783      | 1.02811e4    | 317.07803    | 50.3718 |
| 2      | 21.460        | VB   | 0.5774      | 1.01293e4    | 253.94756    | 49.6282 |

Totals : 2.04105e4 571.02559

Data File E:\DATA\HZY\HZY-2-NAI\HZY-2NAI-RAC 2016-03-30 20-31-11\079-2601.D  
Sample Name: wsw-1-75-9

```
=====
Acq. Operator   : SYSTEM                      Seq. Line :   26
Acq. Instrument : 1260HPLC-DAD                Location  : Vial 79
Injection Date  : 3/31/2016 3:52:05 PM        Inj       :    1
                                           Inj Volume: 5.000 µl

Acq. Method     : E:\DATA\HZY\HZY-2-NAI\HZY-2NAI-RAC 2016-03-30 20-31-11\DAD-OJ(1-6)-95-5-1.
                  OML-ALL-45MIN.M
Last changed    : 3/31/2016 1:46:38 PM by SYSTEM
Analysis Method : E:\DATA\HZY\HZY-2-NAI\HZY-2NAI-RAC 2016-03-30 20-31-11\DAD-OJ(1-6)-95-5-1.
                  OML-ALL-45MIN.M (Sequence Method)
Last changed    : 9/5/2016 10:18:37 AM by SYSTEM
                  (modified after loading)
Additional Info : Peak(s) manually integrated
=====
```

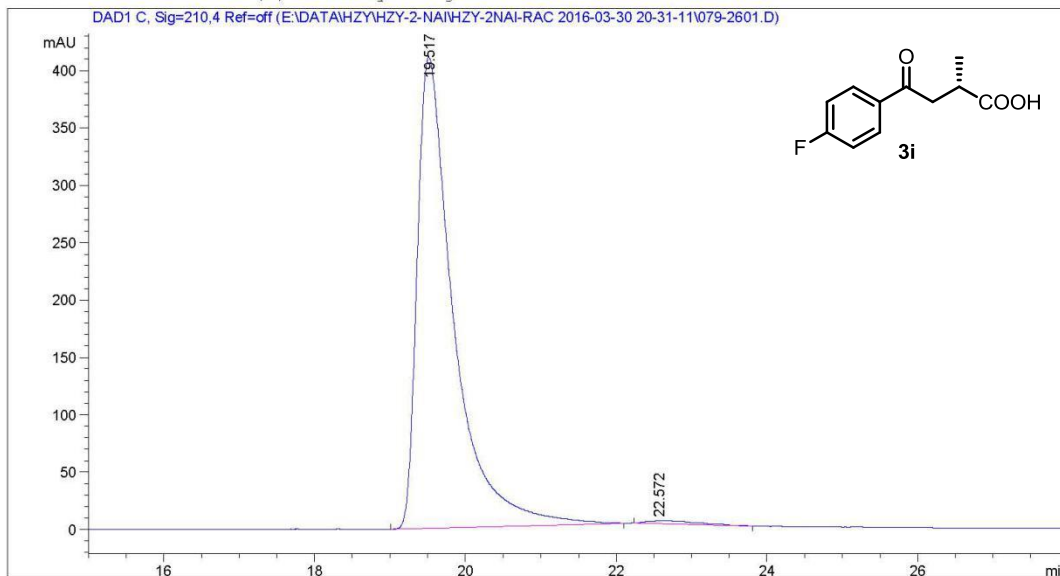

Area Percent Report

```
Sorted By      : Signal
Multiplier     : 1.0000
Dilution       : 1.0000
Use Multiplier & Dilution Factor with ISTDs
```

Signal 1: DAD1 C, Sig=210,4 Ref=off

| Peak # | RetTime [min] | Type | Width [min] | Area [mAU*s] | Height [mAU] | Area %  |
|--------|---------------|------|-------------|--------------|--------------|---------|
| 1      | 19.517        | BB   | 0.4873      | 1.37680e4    | 410.51605    | 99.0316 |
| 2      | 22.572        | BB   | 0.5940      | 134.63878    | 2.69914      | 0.9684  |

Totals : 1.39027e4 413.21520

Data File E:\DATA\WSW\WSW-1-33\WSW-1-33A 2015-12-23 15-11-27\076-0601.D  
Sample Name: WSW-1-33-6

```
=====
Acq. Operator   : SYSTEM                      Seq. Line :    6
Acq. Instrument : 1260HPLC-DAD                Location  : Vial 76
Injection Date  : 12/23/2015 7:02:06 PM        Inj       :    1
                                           Inj Volume: 5.000 µl

Acq. Method     : E:\DATA\WSW\WSW-1-33\WSW-1-33A 2015-12-23 15-11-27\
DAD-OJ(1-6)-95-5-1.0ML-ALL-45MIN.M
Last changed    : 12/23/2015 3:11:27 PM by SYSTEM
Analysis Method : E:\DATA\WSW\WSW-1-33\WSW-1-33A 2015-12-23 15-11-27\
DAD-OJ(1-6)-95-5-1.0ML-ALL-45MIN.M (Sequence Method)
Last changed    : 9/5/2016 10:32:49 AM by SYSTEM
                 (modified after loading)
Additional Info  : Peak(s) manually integrated
=====
```

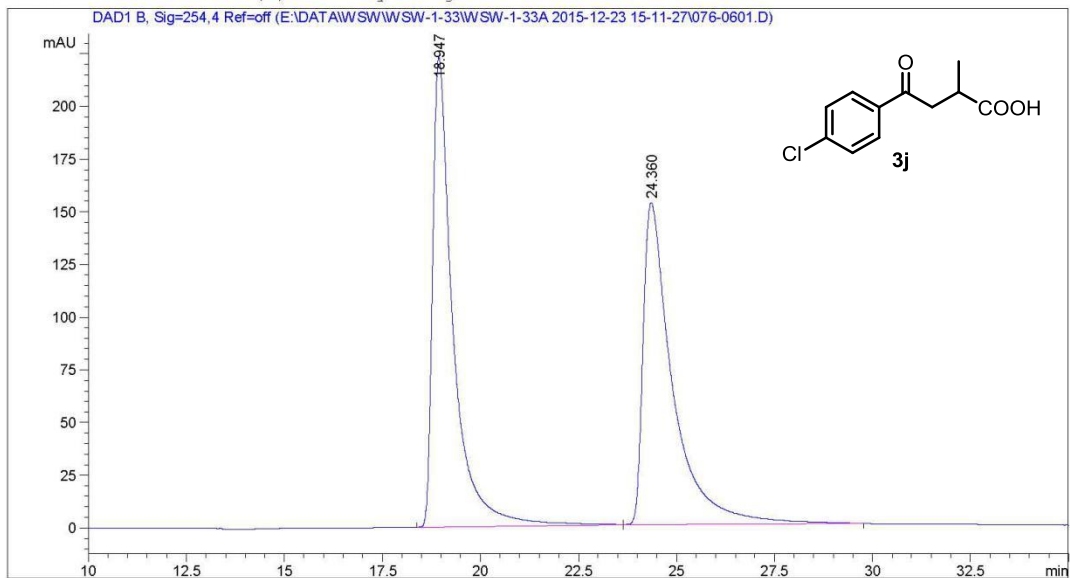

Area Percent Report

```
=====
Sorted By      :      Signal
Multiplier     :      1.0000
Dilution       :      1.0000
Use Multiplier & Dilution Factor with ISTDs
=====
```

Signal 1: DAD1 B, Sig=254,4 Ref=off

| Peak # | RetTime [min] | Type | Width [min] | Area [mAU*s] | Height [mAU] | Area %  |
|--------|---------------|------|-------------|--------------|--------------|---------|
| 1      | 18.947        | BB   | 0.5248      | 8079.64014   | 222.92558    | 50.2066 |
| 2      | 24.360        | BB   | 0.7503      | 8013.15137   | 152.68410    | 49.7934 |

Totals : 1.60928e4 375.60968

Data File E:\DATA\HZY\HZY-2-NAI\HZY-2NAI-RAC 2016-03-30 20-31-11\080-2701.D  
Sample Name: wsw-1-75-10

```
=====
Acq. Operator   : SYSTEM                      Seq. Line :   27
Acq. Instrument : 1260HPLC-DAD                Location  : Vial 80
Injection Date  : 3/31/2016 4:38:07 PM        Inj       :    1
                                           Inj Volume: 5.000 µl

Acq. Method     : E:\DATA\HZY\HZY-2-NAI\HZY-2NAI-RAC 2016-03-30 20-31-11\
DAD-OJ(1-6)-95-5-1.
                   OML-ALL-45MIN.M
Last changed    : 3/31/2016 1:46:38 PM by SYSTEM
Analysis Method : E:\DATA\HZY\HZY-2-NAI\HZY-2NAI-RAC 2016-03-30 20-31-11\
DAD-OJ(1-6)-95-5-1.
                   OML-ALL-45MIN.M (Sequence Method)
Last changed    : 9/5/2016 10:31:01 AM by SYSTEM
                   (modified after loading)
Additional Info : Peak(s) manually integrated
=====
```

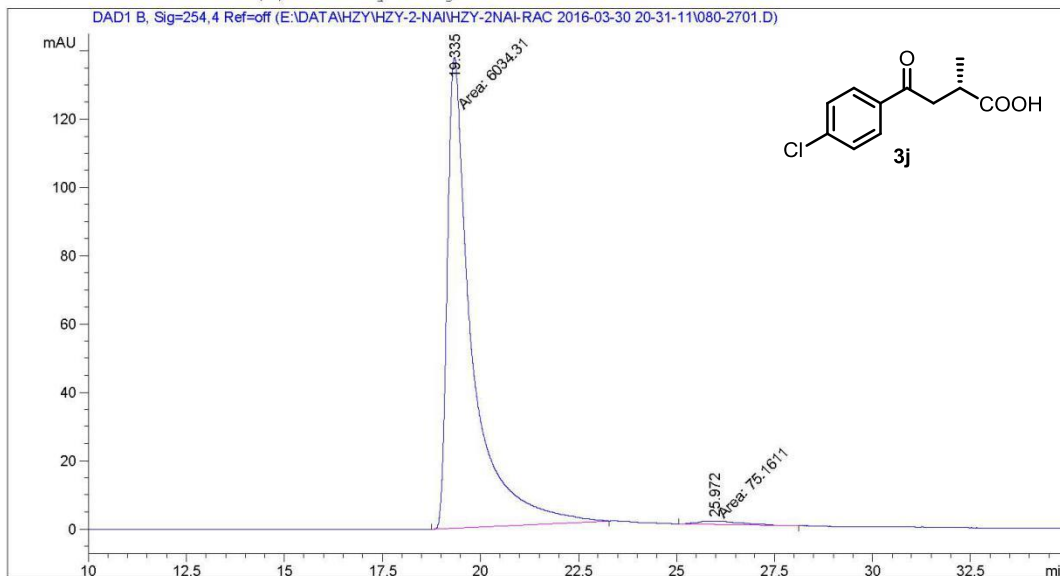

# Area Percent Report

```
=====
Sorted By      :      Signal
Multiplier     :      1.0000
Dilution       :      1.0000
Use Multiplier & Dilution Factor with ISTDs
=====
```

Signal 1: DAD1 B, Sig=254,4 Ref=off

| Peak # | RetTime [min] | Type | Width [min] | Area [mAU*s] | Height [mAU] | Area %  |
|--------|---------------|------|-------------|--------------|--------------|---------|
| 1      | 19.335        | MM   | 0.7295      | 6034.31055   | 137.85857    | 98.7698 |
| 2      | 25.972        | MM   | 1.3019      | 75.16106     | 9.62180e-1   | 1.2302  |

Totals : 6109.47161 138.82075

Data File E:\DATA\WSW\WSW-1-33\WSW-1-33A 2015-12-23 15-11-27\077-0701.D  
Sample Name: WSW-1-33-7

```
=====
Acq. Operator   : SYSTEM                      Seq. Line :    7
Acq. Instrument : 1260HPLC-DAD                Location  : Vial 77
Injection Date  : 12/23/2015 7:48:05 PM        Inj       :    1
                                           Inj Volume: 5.000 µl

Acq. Method     : E:\DATA\WSW\WSW-1-33\WSW-1-33A 2015-12-23 15-11-27\
DAD-OJ(1-6)-95-5-1.OML-ALL-45MIN.M
Last changed    : 12/23/2015 8:27:34 PM by SYSTEM
                  (modified after loading)
Analysis Method : E:\DATA\WSW\WSW-1-33\WSW-1-33A 2015-12-23 15-11-27\
DAD-OJ(1-6)-95-5-1.OML-ALL-45MIN.M (Sequence Method)
Last changed    : 9/5/2016 10:41:11 AM by SYSTEM
                  (modified after loading)
Additional Info  : Peak(s) manually integrated
=====
```

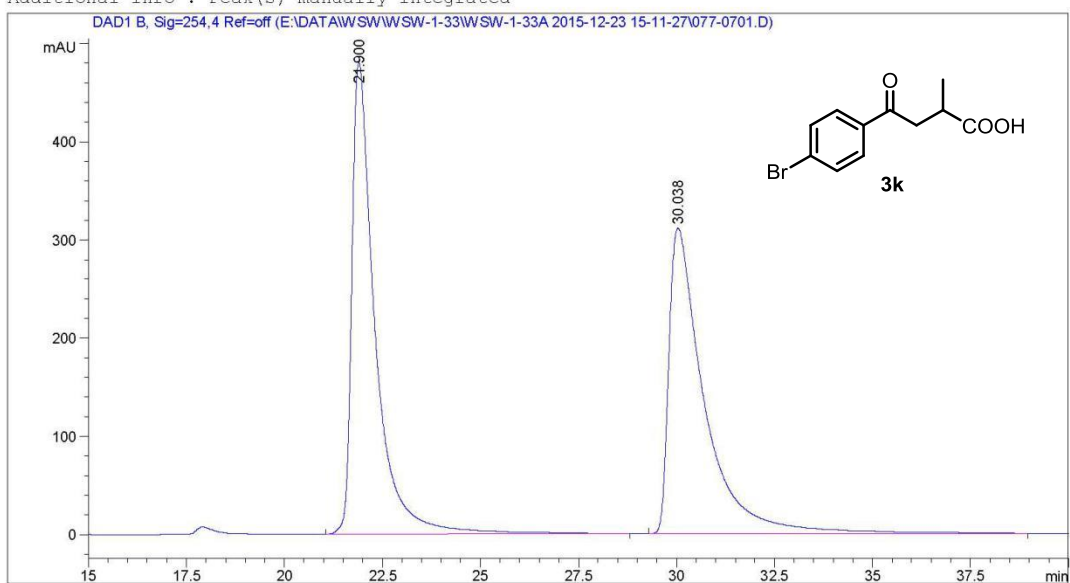

Area Percent Report

```
=====
Sorted By      :      Signal
Multiplier     :      1.0000
Dilution       :      1.0000
Use Multiplier & Dilution Factor with ISTDs
=====
```

Signal 1: DAD1 B, Sig=254,4 Ref=off

| Peak # | RetTime [min] | Type | Width [min] | Area [mAU*s] | Height [mAU] | Area %  |
|--------|---------------|------|-------------|--------------|--------------|---------|
| 1      | 21.900        | BB   | 0.5987      | 1.97965e4    | 480.42813    | 50.3200 |
| 2      | 30.038        | BB   | 0.8950      | 1.95447e4    | 311.06342    | 49.6800 |

Totals : 3.93412e4 791.49155

Data File E:\DATA\HZY\HZY-2-NAI\HZY-2NAI-RAC 2016-03-30 20-31-11\081-2801.D  
Sample Name: wsw-1-75-11

```
=====
Acq. Operator   : SYSTEM                      Seq. Line :   28
Acq. Instrument : 1260HPLC-DAD                Location  : Vial 81
Injection Date  : 3/31/2016 5:24:09 PM        Inj       :    1
                                           Inj Volume: 5.000 µl

Acq. Method     : E:\DATA\HZY\HZY-2-NAI\HZY-2NAI-RAC 2016-03-30 20-31-11\
                OML-ALL-45MIN.M
Last changed    : 3/31/2016 1:46:38 PM by SYSTEM
Analysis Method : E:\DATA\HZY\HZY-2-NAI\HZY-2NAI-RAC 2016-03-30 20-31-11\
                OML-ALL-45MIN.M (Sequence Method)
Last changed    : 9/5/2016 10:39:23 AM by SYSTEM
                (modified after loading)
Additional Info  : Peak(s) manually integrated
=====
```

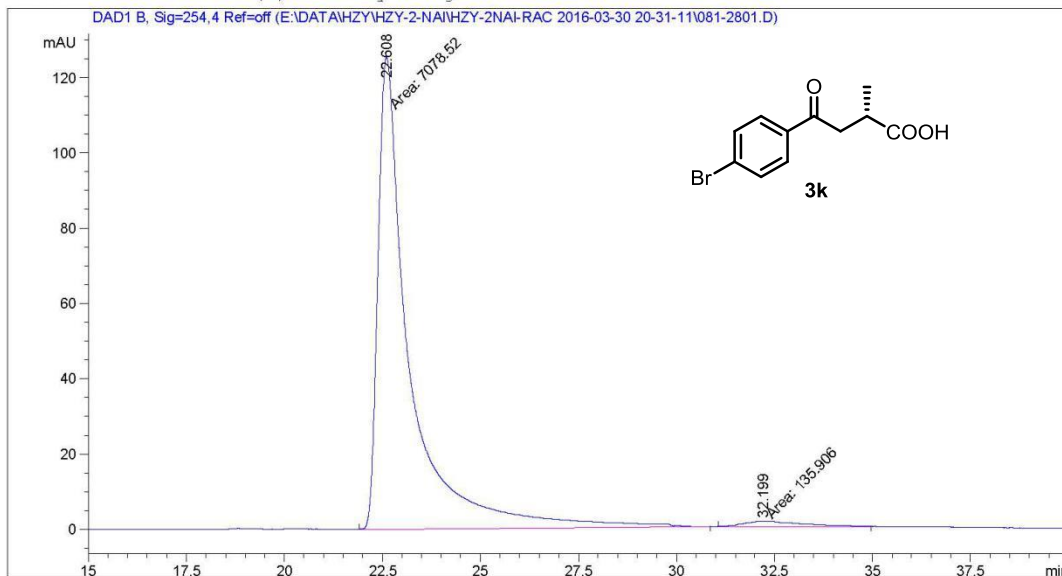

# Area Percent Report

```
=====
Sorted By      :      Signal
Multiplier     :      1.0000
Dilution       :      1.0000
Use Multiplier & Dilution Factor with ISTDs
=====
```

Signal 1: DAD1 B, Sig=254,4 Ref=off

| Peak # | RetTime [min] | Type | Width [min] | Area [mAU*s] | Height [mAU] | Area %  |
|--------|---------------|------|-------------|--------------|--------------|---------|
| 1      | 22.608        | MM   | 0.9406      | 7078.52197   | 125.42750    | 98.1162 |
| 2      | 32.199        | MM   | 1.7115      | 135.90642    | 1.32345      | 1.8838  |

Totals : 7214.42839 126.75095

Sample Name: WSW-1-73-1

```

=====
Acq. Operator   : SYSTEM                      Seq. Line :    2
Acq. Instrument : 1260HPLC-DAD                Location  : Vial 71
Injection Date  : 3/30/2016 6:32:48 AM         Inj       :    1
                                           Inj Volume: 5.000 µl

Acq. Method     : E:\DATA\WSW\WSW-1-73A\WSW 2016-03-30 06-20-57\DAD-OJ(1-6)-95-5-1.0ML-ALL-
                  45MIN.M
Last changed    : 3/30/2016 6:42:23 AM by SYSTEM
                  (modified after loading)
Analysis Method : E:\DATA\WSW\WSW-1-73A\WSW 2016-03-30 06-20-57\DAD-OJ(1-6)-95-5-1.0ML-ALL-
                  45MIN.M (Sequence Method)
Last changed    : 9/5/2016 8:30:45 PM by SYSTEM
                  (modified after loading)
Additional Info : Peak(s) manually integrated
=====

```

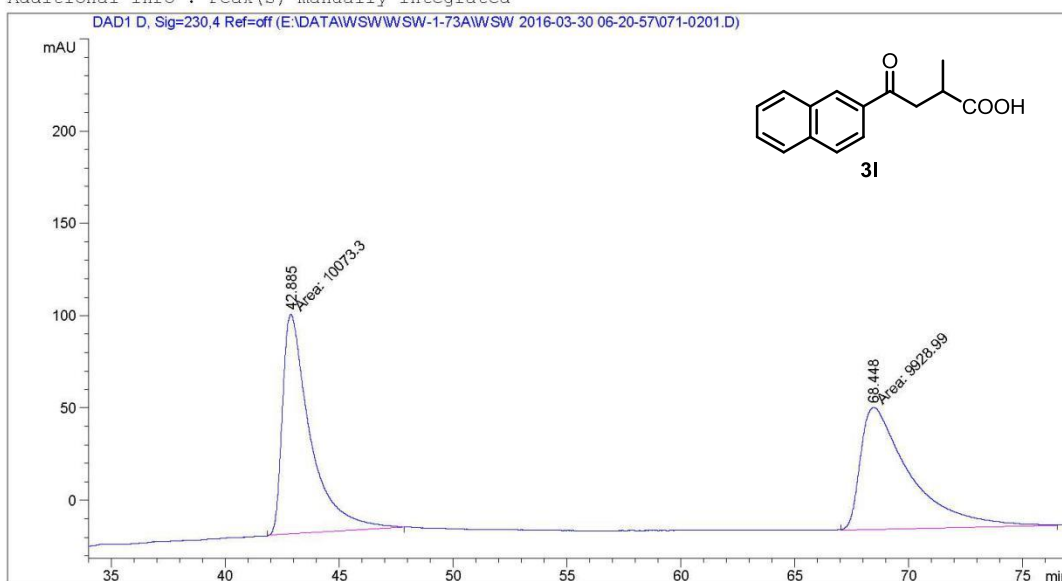

```

=====
Area Percent Report
=====

```

```

Sorted By      :      Signal
Multiplier     :      1.0000
Dilution       :      1.0000
Use Multiplier & Dilution Factor with ISTDs

```

Signal 1: DAD1 D, Sig=230,4 Ref=off

| Peak # | RetTime [min] | Type | Width [min] | Area [mAU*s] | Height [mAU] | Area %  |
|--------|---------------|------|-------------|--------------|--------------|---------|
| 1      | 42.885        | MM   | 1.4131      | 1.00733e4    | 118.81017    | 50.3606 |
| 2      | 68.448        | MM   | 2.5070      | 9928.98828   | 66.00892     | 49.6394 |

Totals :                      2.00022e4    184.81909



Data File E:\DATA\WSW\WSW-2016-9-5\WQ-3-19-RAC-2 2016-09-05 14-02-05\061-0701.D  
Sample Name: wsw-1-175-12

```

=====
Acq. Operator   : SYSTEM                      Seq. Line :    7
Acq. Instrument : 1260HPLC-DAD                Location  : Vial 61
Injection Date  : 9/5/2016 4:14:58 PM          Inj       :    1
                                           Inj Volume: 5.000 µl

Acq. Method     : E:\DATA\WSW\WSW-2016-9-5\WQ-3-19-RAC-2 2016-09-05 14-02-05\
-1.OML-ALL-45MIN.M
Last changed    : 9/5/2016 4:33:49 PM by SYSTEM
(modified after loading)
Analysis Method : E:\DATA\WSW\WSW-2016-9-5\WQ-3-19-RAC-2 2016-09-05 14-02-05\
-1.OML-ALL-45MIN.M (Sequence Method)
Last changed    : 2/10/2017 9:05:17 PM by SYSTEM
(modified after loading)
Additional Info : Peak(s) manually integrated
=====

```

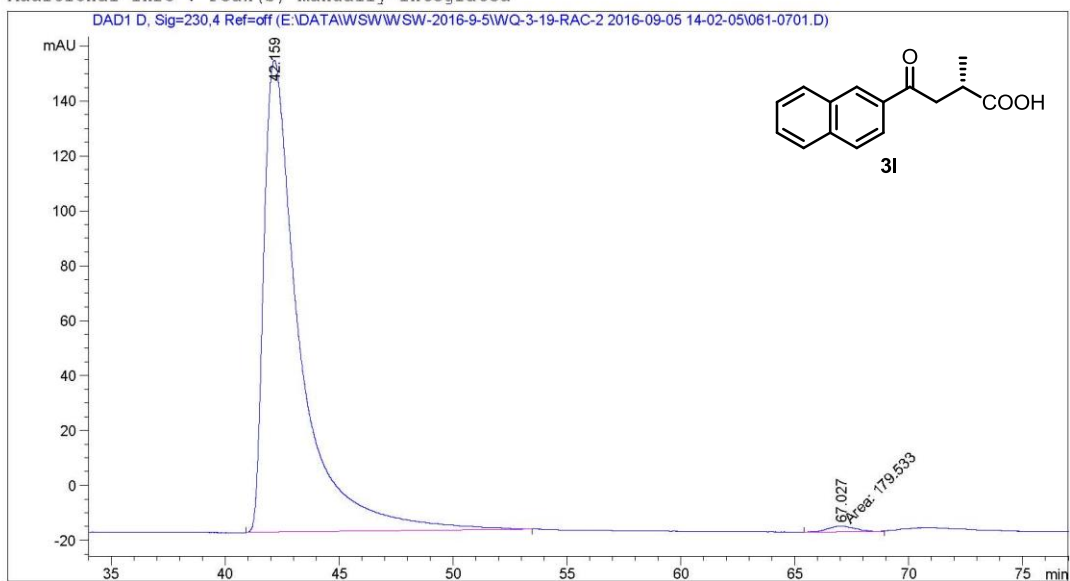

# Area Percent Report

```

=====
Sorted By      :      Signal
Multiplier     :      1.0000
Dilution       :      1.0000
Use Multiplier & Dilution Factor with ISTDs
=====

```

Signal 1: DAD1 D, Sig=230,4 Ref=off

| Peak # | RetTime [min] | Type | Width [min] | Area [mAU*s] | Height [mAU] | Area %  |
|--------|---------------|------|-------------|--------------|--------------|---------|
| 1      | 42.159        | BB   | 1.5528      | 1.87795e4    | 171.85948    | 99.0530 |
| 2      | 67.027        | MM   | 1.4412      | 179.53259    | 2.07624      | 0.9470  |

Totals : 1.89590e4 173.93572



Data File E:\DATA\WSW\WSW-2-99-100\WSW-2-99-100 2017-07-22 09-08-09\014-0401.D  
Sample Name: WSW-2-100-1

```
=====
Acq. Operator   : SYSTEM                      Seq. Line :    4
Acq. Instrument : 1260HPLC-VWD              Location  : Vial 14
Injection Date  : 7/22/2017 11:21:24 AM      Inj       :    1
                                           Inj Volume: 10.000 µl

Acq. Method     : E:\DATA\WSW\WSW-2-99-100\WSW-2-99-100 2017-07-22 09-08-09\VWD-AD(1-2)-95-5-
                  1ML-10UL-210NM-60MIN.M
Last changed    : 7/22/2017 9:08:09 AM by SYSTEM
Analysis Method : E:\DATA\WSW\WSW-2-99-100\WSW-2-99-100 2017-07-22 09-08-09\VWD-AD(1-2)-95-5-
                  1ML-10UL-210NM-60MIN.M (Sequence Method)
Last changed    : 7/22/2017 4:17:36 PM by SYSTEM
                  (modified after loading)
Additional Info  : Peak(s) manually integrated
=====
```

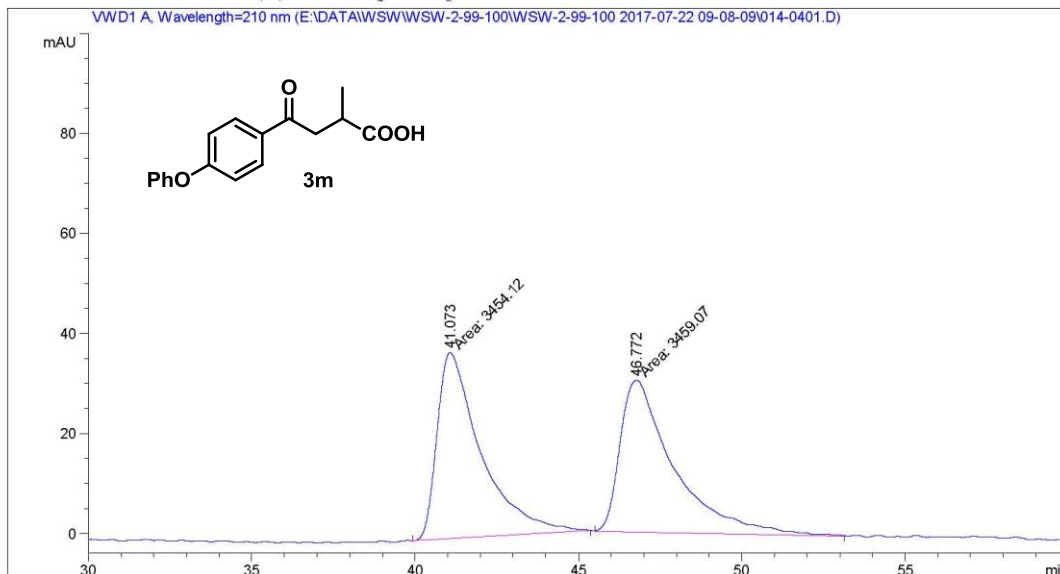

#### Area Percent Report

```
=====
Sorted By      : Signal
Multiplier     : 1.0000
Dilution       : 1.0000
Do not use Multiplier & Dilution Factor with ISTDs
=====
```

Signal 1: VWD1 A, Wavelength=210 nm

| Peak # | RetTime [min] | Type | Width [min] | Area [mAU*s] | Height [mAU] | Area %  |
|--------|---------------|------|-------------|--------------|--------------|---------|
| 1      | 41.073        | MM   | 1.5479      | 3454.11890   | 37.19158     | 49.9642 |
| 2      | 46.772        | MM   | 1.8979      | 3459.06543   | 30.37634     | 50.0358 |

Totals : 6913.18433 67.56792

Data File E:\DATA\WSW\WSW-2-99-100\WSW-2-99-100 2017-07-22 09-08-09\015-0301.D  
Sample Name: WSW-2-99-2

```
=====
Acq. Operator   : SYSTEM                      Seq. Line :    3
Acq. Instrument : 1260HPLC-VWD              Location  : Vial 15
Injection Date  : 7/22/2017 10:20:35 AM      Inj       :    1
                                           Inj Volume: 10.000 µl

Acq. Method     : E:\DATA\WSW\WSW-2-99-100\WSW-2-99-100 2017-07-22 09-08-09\VWD-AD(1-2)-95-5-
                  1ML-10UL-210NM-60MIN.M
Last changed    : 7/22/2017 9:08:09 AM by SYSTEM
Analysis Method : E:\DATA\WSW\WSW-2-99-100\WSW-2-99-100 2017-07-22 09-08-09\VWD-AD(1-2)-95-5-
                  1ML-10UL-210NM-60MIN.M (Sequence Method)
Last changed    : 7/22/2017 4:16:05 PM by SYSTEM
                  (modified after loading)
Additional Info  : Peak(s) manually integrated
=====
```

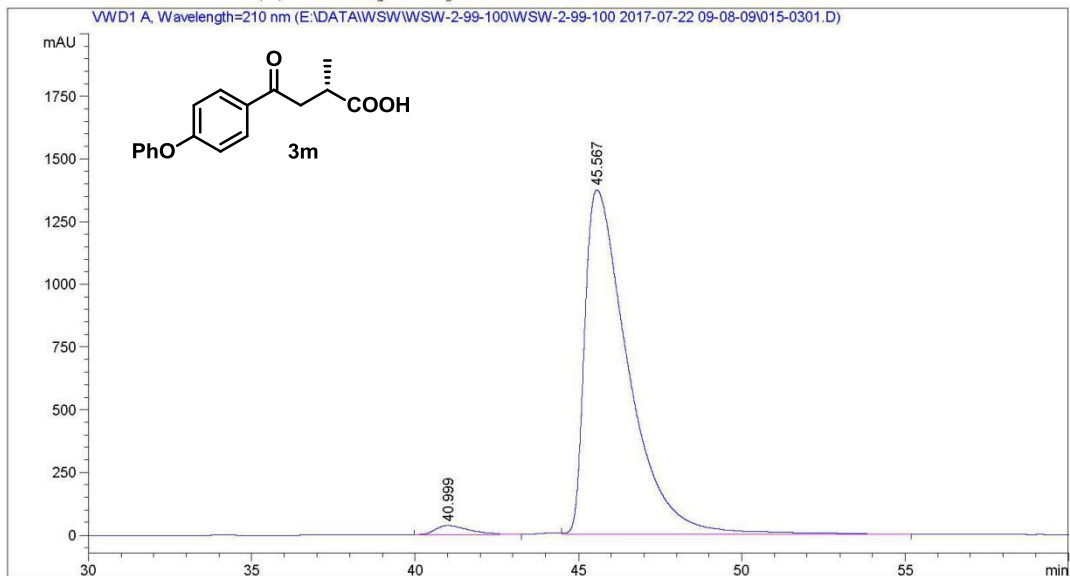

# Area Percent Report

```
=====
Sorted By      :      Signal
Multiplier     :      1.0000
Dilution       :      1.0000
Do not use Multiplier & Dilution Factor with ISTDs
=====
```

Signal 1: VWD1 A, Wavelength=210 nm

| Peak # | RetTime [min] | Type | Width [min] | Area [mAU*s] | Height [mAU] | Area %  |
|--------|---------------|------|-------------|--------------|--------------|---------|
| 1      | 40.999        | BB   | 1.0526      | 2599.48291   | 36.55566     | 2.0022  |
| 2      | 45.567        | VB   | 1.3483      | 1.27229e5    | 1373.98499   | 97.9978 |

Totals : 1.29828e5 1410.54065

Data File E:\DATA\CCY\CCY-7-99\CCY-7-99 2016-06-25 13-00-00\081-0201.D  
Sample Name: ccy-7-99-1

```
=====
Acq. Operator   : SYSTEM                      Seq. Line :    2
Acq. Instrument : 1260HPLC-DAD                Location  : Vial 81
Injection Date  : 6/25/2016 1:11:56 PM         Inj       :    1
                                           Inj Volume: 5.000 µl

Acq. Method     : E:\DATA\CCY\CCY-7-99\CCY-7-99 2016-06-25 13-00-00\DAD-OJ(1-6)-99-1-1.0ML-
                    5UL-45MIN-ALL.M
Last changed    : 6/25/2016 1:00:00 PM by SYSTEM
Analysis Method : E:\DATA\CCY\CCY-7-99\CCY-7-99 2016-06-25 13-00-00\DAD-OJ(1-6)-99-1-1.0ML-
                    5UL-45MIN-ALL.M (Sequence Method)
Last changed    : 9/5/2016 8:52:56 PM by SYSTEM
                    (modified after loading)
Additional Info : Peak(s) manually integrated
=====
```

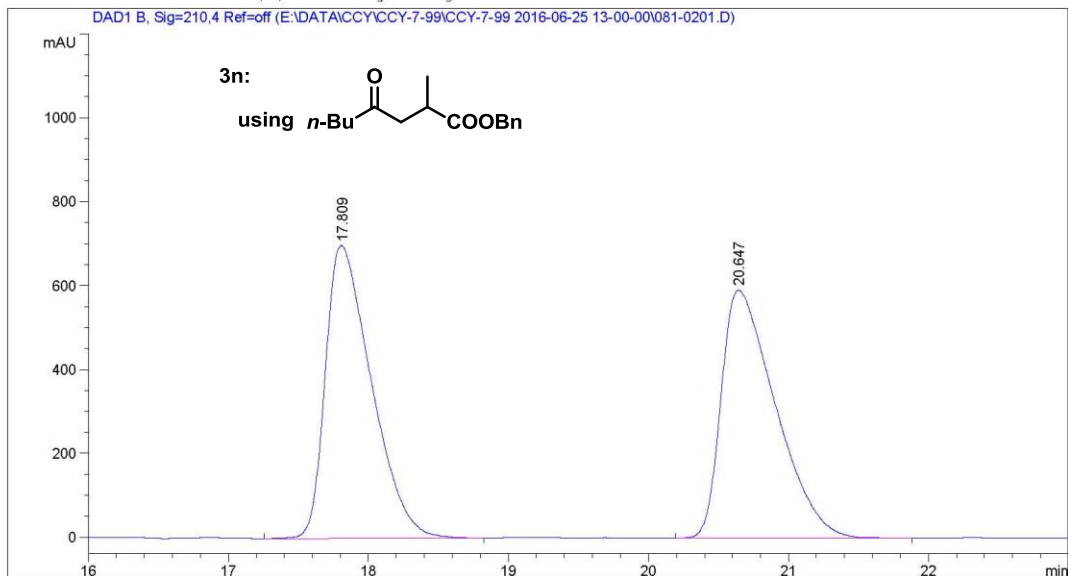

Area Percent Report

```
=====
Sorted By      :      Signal
Multiplier     :      1.0000
Dilution       :      1.0000
Use Multiplier & Dilution Factor with ISTDs
=====
```

Signal 1: DAD1 B, Sig=210,4 Ref=off

| Peak # | RetTime [min] | Type | Width [min] | Area [mAU*s] | Height [mAU] | Area %  |
|--------|---------------|------|-------------|--------------|--------------|---------|
| 1      | 17.809        | BB   | 0.3456      | 1.58933e4    | 698.08386    | 50.0459 |
| 2      | 20.647        | BB   | 0.4090      | 1.58641e4    | 591.29150    | 49.9541 |

Totals :                    3.17575e4   1289.37537

Data File E:\DATA\WSW\WSW-1-114-1-1\WSW-1-114 2016-07-08 09-53-29\061-0301.D  
Sample Name: WSW-1-114-1-1A

```
=====
Acq. Operator   : SYSTEM                      Seq. Line :    3
Acq. Instrument : 1260HPLC-DAD                Location  : Vial 61
Injection Date  : 7/8/2016 10:44:42 AM        Inj       :    1
                                           Inj Volume: 5.000 µl

Acq. Method     : E:\DATA\WSW\WSW-1-114-1-1\WSW-1-114 2016-07-08 09-53-29\DAD-OJ(1-6)-99-1-1.
                  OML-5UL-45MIN-ALL.M
Last changed    : 7/8/2016 10:43:44 AM by SYSTEM
Analysis Method : E:\DATA\WSW\WSW-1-114-1-1\WSW-1-114 2016-07-08 09-53-29\DAD-OJ(1-6)-99-1-1.
                  OML-5UL-45MIN-ALL.M (Sequence Method)
Last changed    : 9/5/2016 8:48:49 PM by SYSTEM
                  (modified after loading)
Additional Info  : Peak(s) manually integrated
=====
```

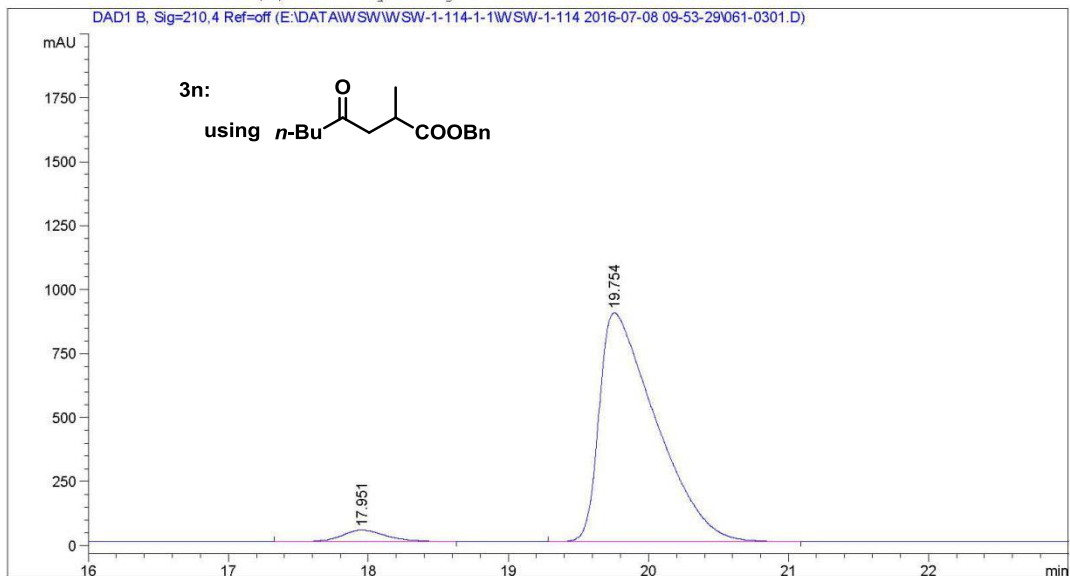

# Area Percent Report

```
=====
Sorted By      :      Signal
Multiplier     :      1.0000
Dilution       :      1.0000
Use Multiplier & Dilution Factor with ISTDs
=====
```

Signal 1: DAD1 B, Sig=210,4 Ref=off

| Peak # | RetTime [min] | Type | Width [min] | Area [mAU*s] | Height [mAU] | Area %  |
|--------|---------------|------|-------------|--------------|--------------|---------|
| 1      | 17.951        | BB   | 0.3263      | 965.45789    | 44.64465     | 3.7097  |
| 2      | 19.754        | BB   | 0.4153      | 2.50601e4    | 893.32635    | 96.2903 |

Totals :                    2.60256e4    937.97100

Data File E:\DATA\CCY\CCY-7-130-131\CCY-7-130-131 2016-07-16 15-36-28\030-0301.D  
Sample Name: CCY-7-131-2

```
=====
Acq. Operator   : SYSTEM                      Seq. Line :    3
Acq. Instrument : 1260HPLC-DAD                Location  : Vial 30
Injection Date  : 7/16/2016 4:34:29 PM         Inj       :    1
                                           Inj Volume: 5.000 µl

Acq. Method     : E:\DATA\CCY\CCY-7-130-131\CCY-7-130-131 2016-07-16 15-36-28\DAD-OJ(1-6)-99-
                  1-1.0ML-5UL-45MIN-ALL.M
Last changed    : 7/16/2016 4:56:46 PM by SYSTEM
                  (modified after loading)
Analysis Method : E:\DATA\CCY\CCY-7-130-131\CCY-7-130-131 2016-07-16 15-36-28\DAD-OJ(1-6)-99-
                  1-1.0ML-5UL-45MIN-ALL.M (Sequence Method)
Last changed    : 9/3/2016 4:25:47 PM by SYSTEM
                  (modified after loading)
Additional Info  : Peak(s) manually integrated
=====
```

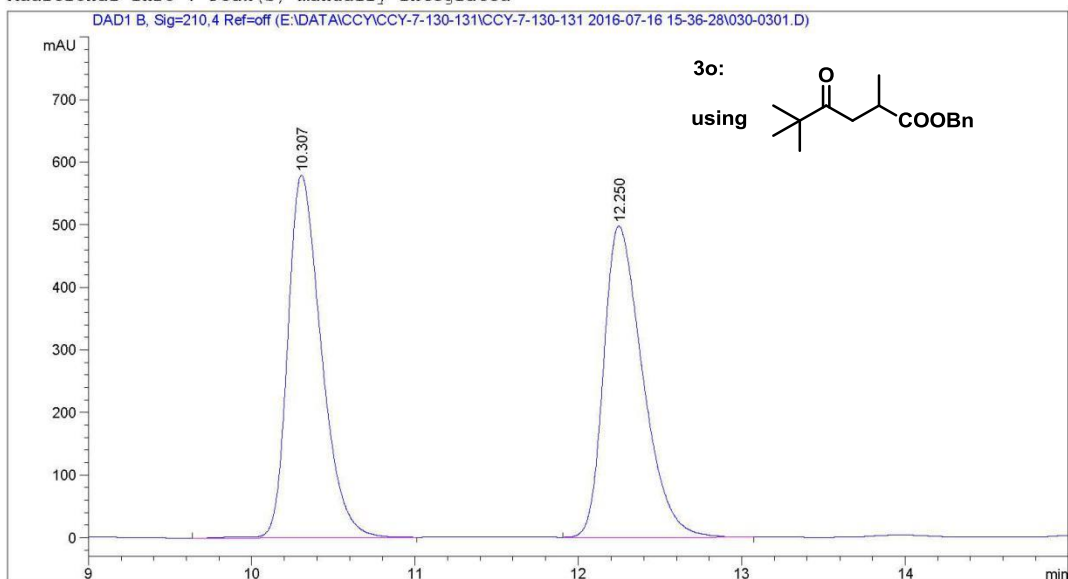

Area Percent Report

```
=====
Sorted By      :      Signal
Multiplier     :      1.0000
Dilution       :      1.0000
Use Multiplier & Dilution Factor with ISTDs
=====
```

Signal 1: DAD1 B, Sig=210,4 Ref=off

| Peak # | RetTime [min] | Type | Width [min] | Area [mAU*s] | Height [mAU] | Area %  |
|--------|---------------|------|-------------|--------------|--------------|---------|
| 1      | 10.307        | BB   | 0.2177      | 8224.67969   | 579.01904    | 49.9209 |
| 2      | 12.250        | BB   | 0.2535      | 8250.75488   | 497.45221    | 50.0791 |

Totals : 1.64754e4 1076.47125

1260HPLC-DAD 9/3/2016 4:26:05 PM SYSTEM

Page 1 of 2

Data File E:\DATA\CCY\CCY-7-162\CCY-7-162 2016-09-03 09-24-13\052-0401.D  
Sample Name: WSW-153-1

```
=====
Acq. Operator   : SYSTEM                      Seq. Line :    4
Acq. Instrument : 1260HPLC-DAD                Location  : Vial 52
Injection Date  : 9/3/2016 10:28:06 AM         Inj       :    1
                                           Inj Volume: 3.000 µl

Acq. Method     : E:\DATA\CCY\CCY-7-162\CCY-7-162 2016-09-03 09-24-13\
5UL-30MIN.M
Last changed    : 9/3/2016 9:50:02 AM by SYSTEM
Analysis Method : E:\DATA\CCY\CCY-7-162\CCY-7-162 2016-09-03 09-24-13\
5UL-30MIN.M (Sequence Method)
Last changed    : 9/3/2016 4:16:36 PM by SYSTEM
(modified after loading)
Additional Info  : Peak(s) manually integrated
=====
```

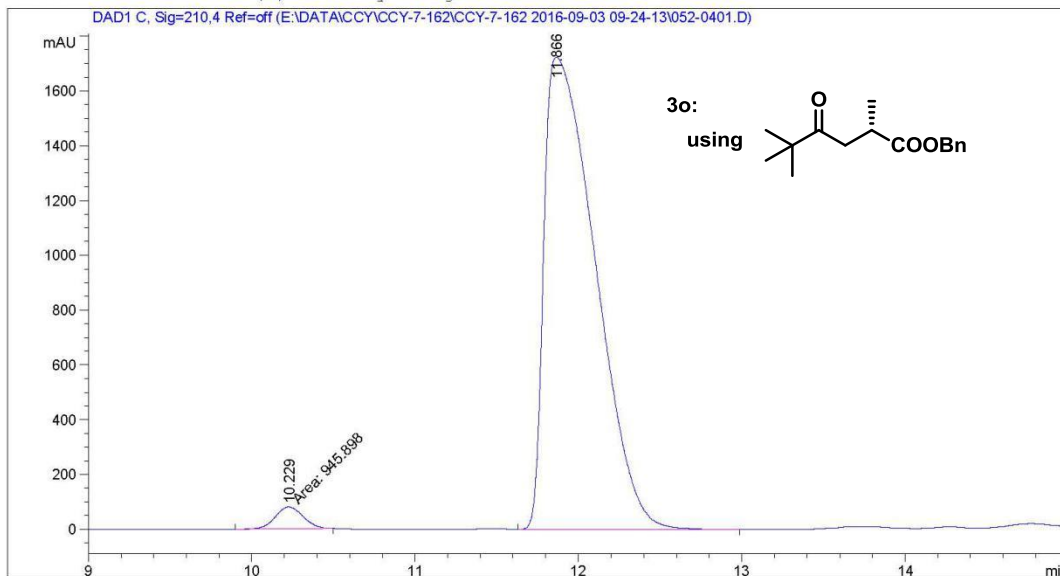

Area Percent Report

```
=====
Sorted By      :      Signal
Multiplier     :      1.0000
Dilution       :      1.0000
Do not use Multiplier & Dilution Factor with ISTDs
=====
```

Signal 1: DAD1 C, Sig=210,4 Ref=off

| Peak # | RetTime [min] | Type | Width [min] | Area [mAU*s] | Height [mAU] | Area %  |
|--------|---------------|------|-------------|--------------|--------------|---------|
| 1      | 10.229        | MM   | 0.1976      | 945.89850    | 79.79642     | 2.4638  |
| 2      | 11.866        | VB   | 0.3495      | 3.74461e4    | 1723.47534   | 97.5362 |

Totals : 3.83920e4 1803.27177

Data File E:\DATA\WWL\WWL-3-175-1\WWL-3-175-1 2016-06-27 22-45-34\031-0601.D  
Sample Name: ccy-7-99-2

```
=====
Acq. Operator   : SYSTEM                      Seq. Line :    6
Acq. Instrument : 1260HPLC-DAD                Location  : Vial 31
Injection Date  : 6/28/2016 1:31:32 AM         Inj       :    1
                                           Inj Volume: 5.000 µl

Acq. Method     : E:\DATA\WWL\WWL-3-175-1\WWL-3-175-1 2016-06-27 22-45-34\
DAD-OJ(1-6)-99-1-1.
                   OML-5UL-45MIN-ALL.M
Last changed    : 6/27/2016 10:46:58 PM by SYSTEM
Analysis Method : E:\DATA\WWL\WWL-3-175-1\WWL-3-175-1 2016-06-27 22-45-34\
DAD-OJ(1-6)-99-1-1.
                   OML-5UL-45MIN-ALL.M (Sequence Method)
Last changed    : 9/3/2016 9:00:48 PM by SYSTEM
                   (modified after loading)
Additional Info  : Peak(s) manually integrated
=====
```

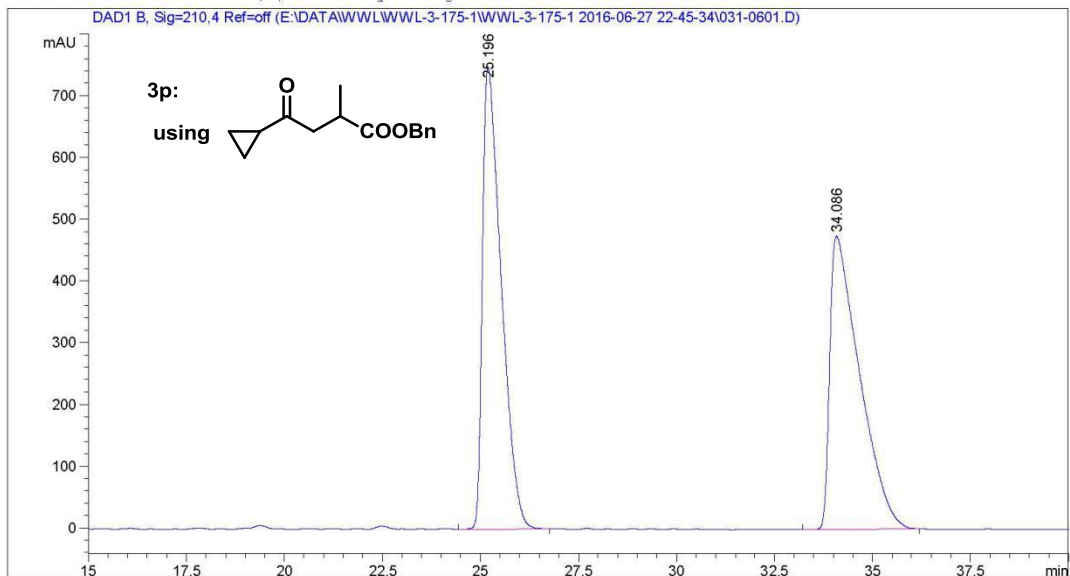

# Area Percent Report

```
=====
Sorted By      :      Signal
Multiplier     :      1.0000
Dilution       :      1.0000
Use Multiplier & Dilution Factor with ISTDs
=====
```

Signal 1: DAD1 B, Sig=210,4 Ref=off

| Peak # | RetTime [min] | Type | Width [min] | Area [mAU*s] | Height [mAU] | Area %  |
|--------|---------------|------|-------------|--------------|--------------|---------|
| 1      | 25.196        | BB   | 0.4999      | 2.49313e4    | 749.75635    | 49.9331 |
| 2      | 34.086        | BB   | 0.7400      | 2.49980e4    | 475.02005    | 50.0669 |

Totals : 4.99293e4 1224.77640



Data File E:\DATA\WSW\WSW-1-114\ (OD-M-ME (D)-95-5 2016-07-07 08-26-28\044-0501.D  
Sample Name: WSW-1-114-3-1

```
=====
Acq. Operator   : SYSTEM                      Seq. Line :    5
Acq. Instrument : 1260HPLC-DAD                Location  : Vial 44
Injection Date  : 7/7/2016 10:56:18 AM        Inj       :    1
                                           Inj Volume: 5.000 µl

Acq. Method     : E:\DATA\WSW\WSW-1-114\ (OD-M-ME (D)-95-5 2016-07-07 08-26-28\
-1.0ML-5UL-45MIN-ALL.M
Last changed    : 7/7/2016 11:31:30 AM by SYSTEM
                  (modified after loading)
Analysis Method : E:\DATA\WSW\WSW-1-114\ (OD-M-ME (D)-95-5 2016-07-07 08-26-28\
-1.0ML-5UL-45MIN-ALL.M (Sequence Method)
Last changed    : 9/3/2016 8:57:48 PM by SYSTEM
                  (modified after loading)
Additional Info : Peak(s) manually integrated
=====
```

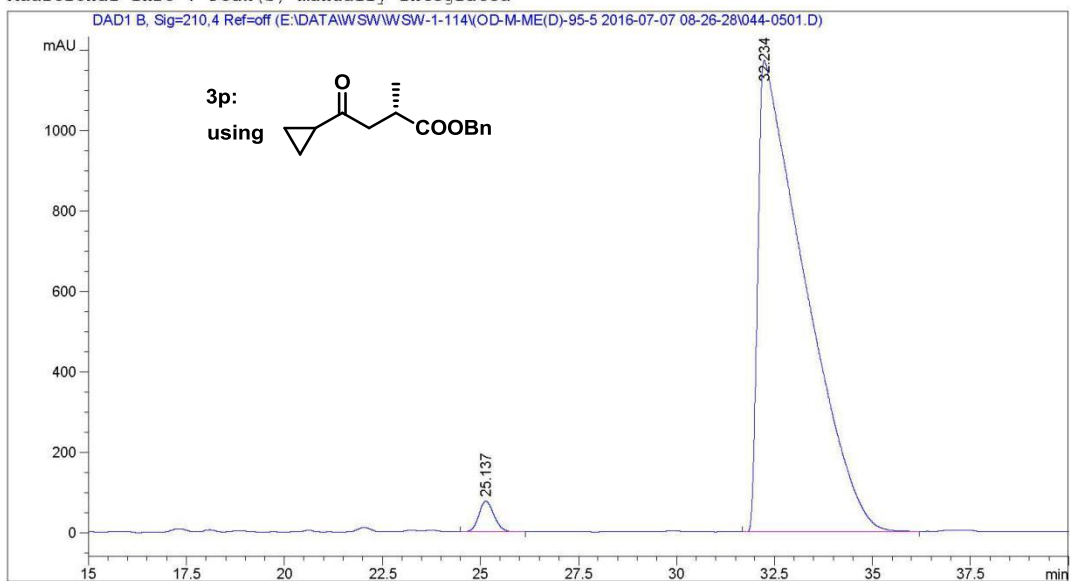

# Area Percent Report

```
=====
Sorted By      :      Signal
Multiplier     :      1.0000
Dilution       :      1.0000
Use Multiplier & Dilution Factor with ISTDs
=====
```

Signal 1: DAD1 B, Sig=210,4 Ref=off

| Peak # | RetTime [min] | Type | Width [min] | Area [mAU*s] | Height [mAU] | Area %  |
|--------|---------------|------|-------------|--------------|--------------|---------|
| 1      | 25.137        | BB   | 0.4217      | 2085.11328   | 76.58176     | 2.1059  |
| 2      | 32.234        | BB   | 1.0624      | 9.69280e4    | 1172.51477   | 97.8941 |

Totals : 9.90131e4 1249.09653



Data File E:\DATA\WWL\WWL-3-175-1\WWL-3-175-1 2016-06-27 22-45-34\032-0701.D  
Sample Name: ccy-7-99-3

```
=====
Acq. Operator   : SYSTEM                      Seq. Line :    7
Acq. Instrument : 1260HPLC-DAD                Location  : Vial 32
Injection Date  : 6/28/2016 2:17:32 AM         Inj       :    1
                                           Inj Volume: 5.000 µl
Acq. Method     : E:\DATA\WWL\WWL-3-175-1\WWL-3-175-1 2016-06-27 22-45-34\
DAD-OJ(1-6)-99-1-1.
OML-5UL-45MIN-ALL.M
Last changed    : 6/27/2016 10:46:58 PM by SYSTEM
Analysis Method : E:\DATA\WWL\WWL-3-175-1\WWL-3-175-1 2016-06-27 22-45-34\
DAD-OJ(1-6)-99-1-1.
OML-5UL-45MIN-ALL.M (Sequence Method)
Last changed    : 9/3/2016 5:27:22 PM by SYSTEM
(modified after loading)
Additional Info : Peak(s) manually integrated
=====
```

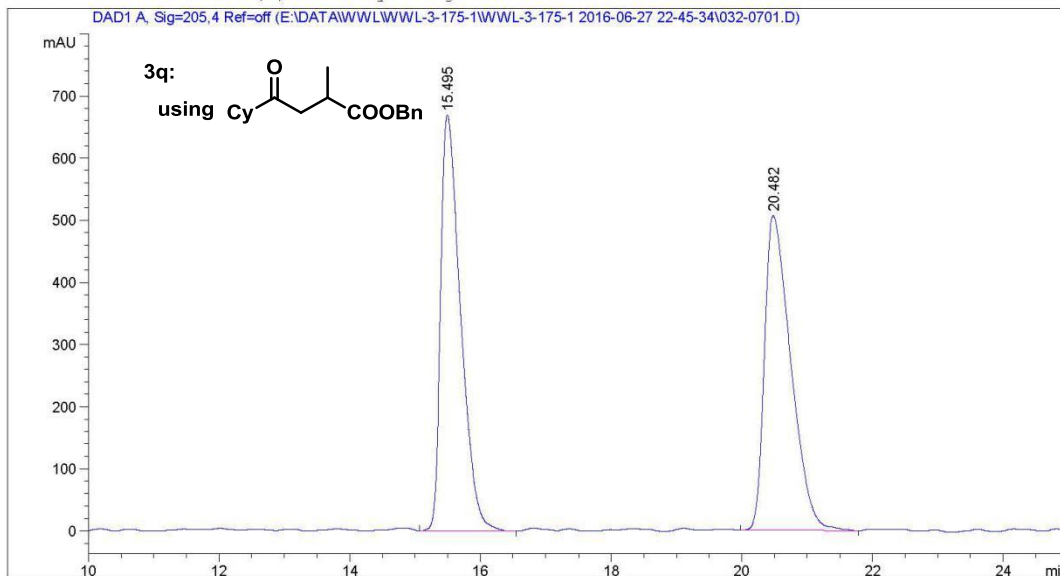

# Area Percent Report

```
=====
Sorted By      :      Signal
Multiplier     :      1.0000
Dilution       :      1.0000
Use Multiplier & Dilution Factor with ISTDs
=====
```

Signal 1: DAD1 A, Sig=205,4 Ref=off

| Peak # | RetTime [min] | Type | Width [min] | Area [mAU*s] | Height [mAU] | Area %  |
|--------|---------------|------|-------------|--------------|--------------|---------|
| 1      | 15.495        | VB   | 0.3197      | 1.41013e4    | 669.61841    | 49.9133 |
| 2      | 20.482        | BB   | 0.4220      | 1.41503e4    | 506.41763    | 50.0867 |

Totals : 2.82516e4 1176.03604

Data File E:\DATA\WSW\WSW-1-114\ (OD-M-ME(D)-95-5 2016-07-07 08-26-28\042-0301.D  
Sample Name: WSW-1-114-2

```
=====
Acq. Operator   : SYSTEM                      Seq. Line :    3
Acq. Instrument : 1260HPLC-DAD                Location  : Vial 42
Injection Date  : 7/7/2016 9:24:22 AM          Inj       :    1
                                           Inj Volume: 5.000 µl

Acq. Method     : E:\DATA\WSW\WSW-1-114\ (OD-M-ME(D)-95-5 2016-07-07 08-26-28\
-1.0ML-5UL-45MIN-ALL.M
Last changed    : 7/7/2016 8:26:28 AM by SYSTEM
Analysis Method : E:\DATA\WSW\WSW-1-114\ (OD-M-ME(D)-95-5 2016-07-07 08-26-28\
-1.0ML-5UL-45MIN-ALL.M (Sequence Method)
Last changed    : 9/3/2016 5:24:57 PM by SYSTEM
(modified after loading)
Additional Info  : Peak(s) manually integrated
=====
```

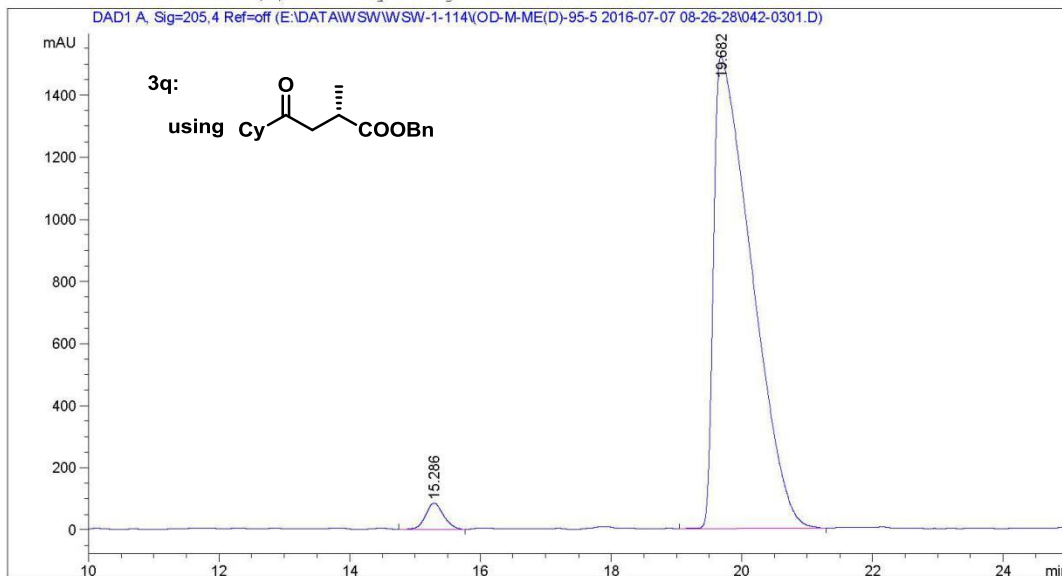

# Area Percent Report

```
Sorted By      : Signal
Multiplier     : 1.0000
Dilution       : 1.0000
Use Multiplier & Dilution Factor with ISTDs
```

Signal 1: DAD1 A, Sig=205,4 Ref=off

| Peak # | RetTime [min] | Type | Width [min] | Area [mAU*s] | Height [mAU] | Area %  |
|--------|---------------|------|-------------|--------------|--------------|---------|
| 1      | 15.286        | BB   | 0.2944      | 1601.35291   | 84.02046     | 2.5606  |
| 2      | 19.682        | VB   | 0.5467      | 6.09372e4    | 1516.76587   | 97.4394 |

Totals : 6.25385e4 1600.78633

Data File E:\DATA\CCY\CCY-7-144\CCY-7-144A 2016-07-25 18-46-40\071-0201.D  
Sample Name: ccy-7-144-2

```
=====
Acq. Operator   : SYSTEM                      Seq. Line :    2
Acq. Instrument : 1260HPLC-VWD                Location  : Vial 71
Injection Date  : 7/25/2016 6:58:14 PM         Inj       :    1
                                           Inj Volume: 5.000 µl

Acq. Method     : E:\DATA\CCY\CCY-7-144\CCY-7-144A 2016-07-25 18-46-40\VWD-AD(1-6)-95-5-1ML-
                    5UL-210-60MIN.M
Last changed    : 7/25/2016 7:26:07 PM by SYSTEM
                    (modified after loading)
Analysis Method : E:\DATA\CCY\CCY-7-144\CCY-7-144A 2016-07-25 18-46-40\VWD-AD(1-6)-95-5-1ML-
                    5UL-210-60MIN.M (Sequence Method)
Last changed    : 7/19/2017 5:25:22 PM by SYSTEM
                    (modified after loading)
Additional Info  : Peak(s) manually integrated
=====
```

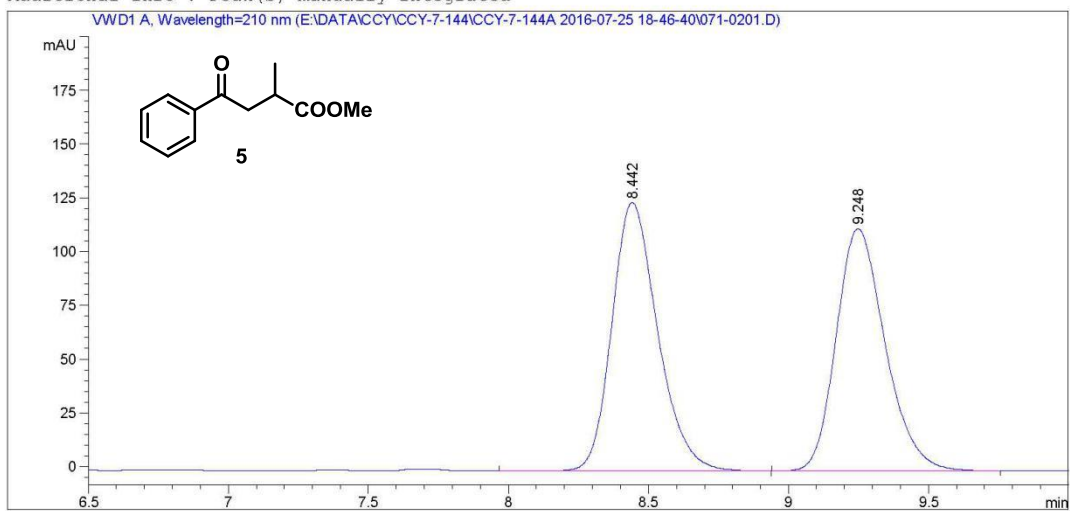

# Area Percent Report

```
=====
Sorted By      :      Signal
Multiplier     :      1.0000
Dilution       :      1.0000
Do not use Multiplier & Dilution Factor with ISTDs
=====
```

Signal 1: VWD1 A, Wavelength=210 nm

| Peak # | RetTime [min] | Type | Width [min] | Area [mAU*s] | Height [mAU] | Area %  |
|--------|---------------|------|-------------|--------------|--------------|---------|
| 1      | 8.442         | BB   | 0.1743      | 1414.93030   | 124.72693    | 50.9759 |
| 2      | 9.248         | BB   | 0.1861      | 1360.75659   | 112.49741    | 49.0241 |

Totals : 2775.68689 237.22434

Data File E:\DATA\WSW\WSW-151-3\WWL-3-DKR-N-R 2016-08-31 14-59-29\062-0201.D  
Sample Name: WSW-151-3

=====

|                 |                        |            |             |
|-----------------|------------------------|------------|-------------|
| Acq. Operator   | : SYSTEM               | Seq. Line  | : 2         |
| Acq. Instrument | : 1260HPLC-VWD         | Location   | : Vial 62   |
| Injection Date  | : 8/31/2016 3:11:10 PM | Inj        | : 1         |
|                 |                        | Inj Volume | : 10.000 µl |

Acq. Method : E:\DATA\WSW\WSW-151-3\WWL-3-DKR-N-R 2016-08-31 14-59-29\VWD-AD(1-6)-95-5-1.  
OML-254NM-60MIN.M

Last changed : 8/31/2016 2:59:29 PM by SYSTEM

Analysis Method : E:\DATA\WSW\WSW-151-3\WWL-3-DKR-N-R 2016-08-31 14-59-29\VWD-AD(1-6)-95-5-1.  
OML-254NM-60MIN.M (Sequence Method)

Last changed : 7/19/2017 5:23:05 PM by SYSTEM  
(modified after loading)

Additional Info : Peak(s) manually integrated

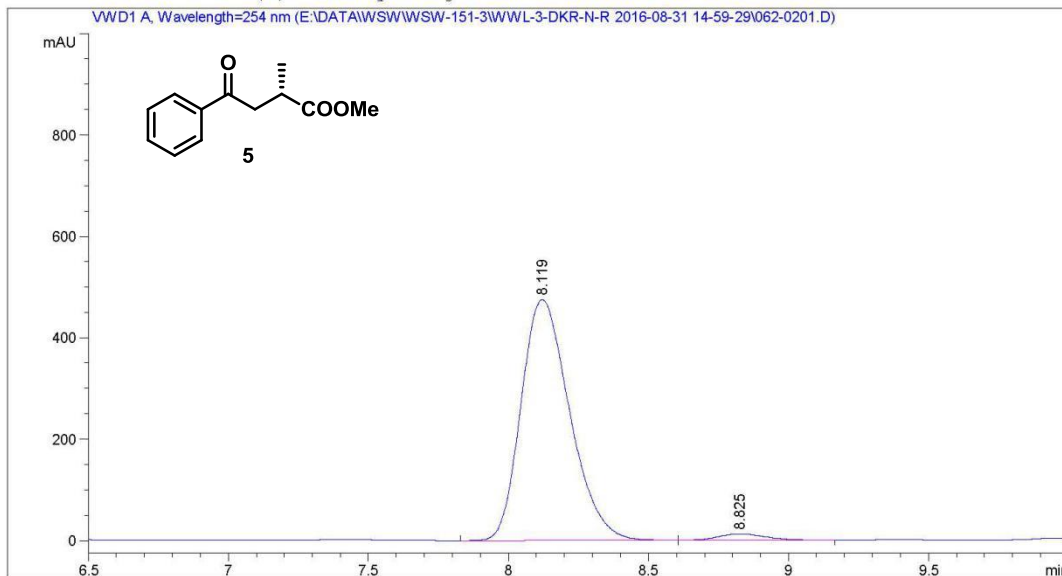

Area Percent Report

Sorted By : Signal  
Multiplier : 1.0000  
Dilution : 1.0000  
Use Multiplier & Dilution Factor with ISTDs

Signal 1: VWD1 A, Wavelength=254 nm

| Peak # | RetTime [min] | Type | Width [min] | Area [mAU*s] | Height [mAU] | Area %  |
|--------|---------------|------|-------------|--------------|--------------|---------|
| 1      | 8.119         | EV   | 0.1865      | 5720.54834   | 474.98645    | 97.4050 |
| 2      | 8.825         | VB   | 0.1847      | 152.40485    | 12.73159     | 2.5950  |

Totals : 5872.95319 487.71804

Data File E:\DATA\WSW\WSW-2-99-100\WSW-2-99-100 2017-07-22 09-08-09\016-1901.D  
Sample Name: WSW-2-100-2

```
=====
Acq. Operator   : SYSTEM                      Seq. Line :   19
Acq. Instrument : 1260HPLC-VWD                Location  : Vial 16
Injection Date  : 7/22/2017 8:04:12 PM         Inj       :    1
                                           Inj Volume: 10.000 µl

Acq. Method     : E:\DATA\WSW\WSW-2-99-100\WSW-2-99-100 2017-07-22 09-08-09\VWD-AD(1-2)-95-5-
                  1ML-10UL-210NM-60MIN.M
Last changed    : 7/22/2017 8:53:16 PM by SYSTEM
                  (modified after loading)
Analysis Method : E:\DATA\WSW\WSW-2-99-100\WSW-2-99-100 2017-07-22 09-08-09\VWD-AD(1-2)-95-5-
                  1ML-10UL-210NM-60MIN.M (Sequence Method)
Last changed    : 7/22/2017 9:02:17 PM by SYSTEM
                  (modified after loading)
Additional Info  : Peak(s) manually integrated
=====
```

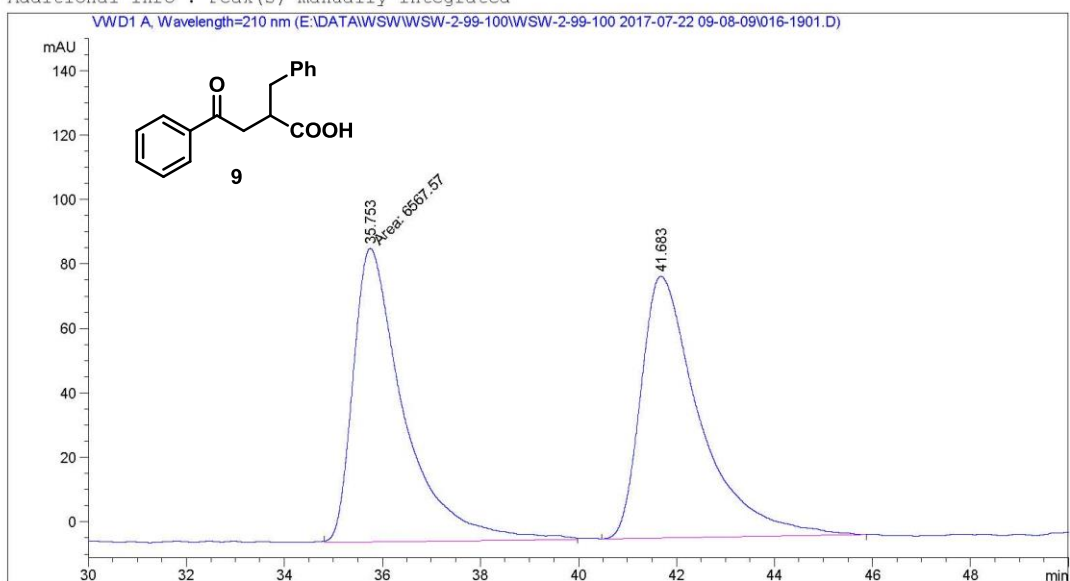

# Area Percent Report

```
=====
Sorted By      :      Signal
Multiplier     :      1.0000
Dilution       :      1.0000
Do not use Multiplier & Dilution Factor with ISTDs
=====
```

Signal 1: VWD1 A, Wavelength=210 nm

| Peak # | RetTime [min] | Type | Width [min] | Area [mAU*s] | Height [mAU] | Area %  |
|--------|---------------|------|-------------|--------------|--------------|---------|
| 1      | 35.753        | MM   | 1.2001      | 6567.56689   | 91.21033     | 49.2973 |
| 2      | 41.683        | BB   | 1.2326      | 6754.78906   | 81.18958     | 50.7027 |

Totals : 1.33224e4 172.39992

Data File E:\DATA\WSW\WSW-2-99-100\WSW-2-99-100 2017-07-22 09-08-09\017-1801.D  
Sample Name: WSW-2-99-1

```
=====
Acq. Operator   : SYSTEM                               Seq. Line :   18
Acq. Instrument : 1260HPLC-VWD                         Location  : Vial 17
Injection Date  : 7/22/2017 7:03:24 PM                 Inj       :    1
                                                    Inj Volume: 10.000 µl

Acq. Method     : E:\DATA\WSW\WSW-2-99-100\WSW-2-99-100 2017-07-22 09-08-09\VWD-AD(1-2)-95-5-
                  1ML-10UL-210NM-60MIN.M
Last changed    : 7/22/2017 4:09:58 PM by SYSTEM
Analysis Method : E:\DATA\WSW\WSW-2-99-100\WSW-2-99-100 2017-07-22 09-08-09\VWD-AD(1-2)-95-5-
                  1ML-10UL-210NM-60MIN.M (Sequence Method)
Last changed    : 7/27/2017 10:26:39 PM by SYSTEM
                  (modified after loading)
Additional Info : Peak(s) manually integrated
=====
```

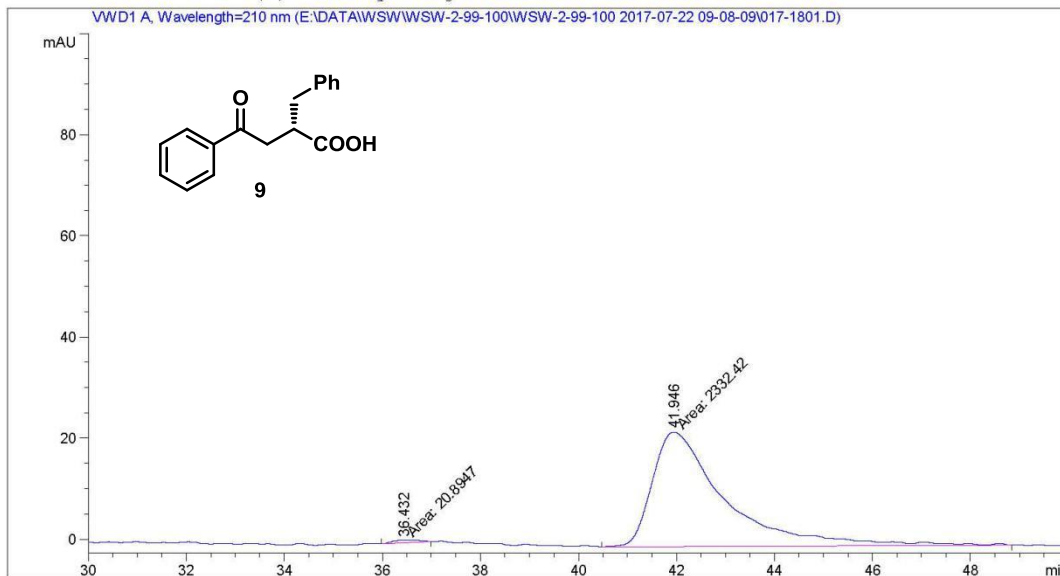

# Area Percent Report

```
=====
Sorted By      :      Signal
Multiplier     :      1.0000
Dilution       :      1.0000
Do not use Multiplier & Dilution Factor with ISTDs
=====
```

Signal 1: VWD1 A, Wavelength=210 nm

| Peak # | RetTime [min] | Type | Width [min] | Area [mAU*s] | Height [mAU] | Area %  |
|--------|---------------|------|-------------|--------------|--------------|---------|
| 1      | 36.432        | MM   | 0.4485      | 20.89468     | 5.54385e-1   | 0.8879  |
| 2      | 41.946        | MM   | 1.7180      | 2332.42212   | 22.62732     | 99.1121 |

Totals : 2353.31680 23.18171

## Reference

- [1] a) T. Noguchi, A. Onodera, K. Tomisawa, S. Yokomori, *Chem. Pharm. Bull.* **2002**, *50*, 1407-1412; b) T. Noguchi, A. Onodera, M. Ito, M. Yoshida, S. Yokomori, *Synth. Comm.*, **2003**, *33*, 2657–2670; c) C. Chen, Z. Zhang, S. Jin, X. Fan, M. Geng, S. Wen, Y. Zhou, X. Wang, L. W. Chung, X.-Q. Dong, X. Zhang. *Angew. Chem. Int. Ed.* **2017**, *56*, 6808-6812; d) G. Abbandonato, G. Signore, R. Nifosi, V. Voliani, R. Bizzarri, F. Beltram, *Eur. Biophys. J.* **2011**, *40*, 1205-1214; e) F., Robert and H., Lourdes M. *J. Am. Chem. Soc.* **1959**, *81*, 391-393. f) S. Dominique, M. Federica, PCT Int. APPL., 2013092979, 27 Jun 2013.
- [2] Hoge, G.; Wu, H.-P.; Kissel, W. S.; Pflum, D. A.; Greene, D. J.; Bao, J. *J. Am. Chem. Soc.* **2004**, *126*, 5966-5967.
